# Supplementary material for: Genomic characterization and gene bank curation of Aegilops: the wild relatives of wheat
Source: Frontiers journal article supplement (doi:10.3389/fpls.2023.1268370), 2023-10-17
Supplement: Data_Sheet_1.pdf [file Data_Sheet_1.pdf]

## **Supplementary Data**

### **Genomic Characterization and Gene Bank Curation of *Aegilops*: The Wild Relatives of Wheat**

Laxman Adhikari<sup>1,2</sup>, John Raupp<sup>2</sup>, Shuangye Wu<sup>2</sup>, Dal-Hoe Koo<sup>2</sup>, Bernd Friebe<sup>2</sup>, and Jesse Poland<sup>1,2,3\*</sup>

<sup>1</sup> KAUST Center for Desert Agriculture, Biological and Environmental Science and Engineering Division, King Abdullah University of Science and Technology (KAUST), Thuwal, 23955-6900, Kingdom of Saudi Arabia

<sup>2</sup> Wheat Genetics Resource Center, Department of Plant Pathology, Kansas State University, Manhattan Kansas, USA, 66502

<sup>3</sup> Plant Science Program, Biological and Environmental Science and Engineering Division, King Abdullah University of Science and Technology (KAUST), Thuwal, 23955-6900, Kingdom of Saudi Arabia

\* Corresponding author: [jesse.poland@kaust.edu.sa](mailto:jesse.poland@kaust.edu.sa) ; ORCID: 0000-0002-7856-1399

## Supplementary Figures

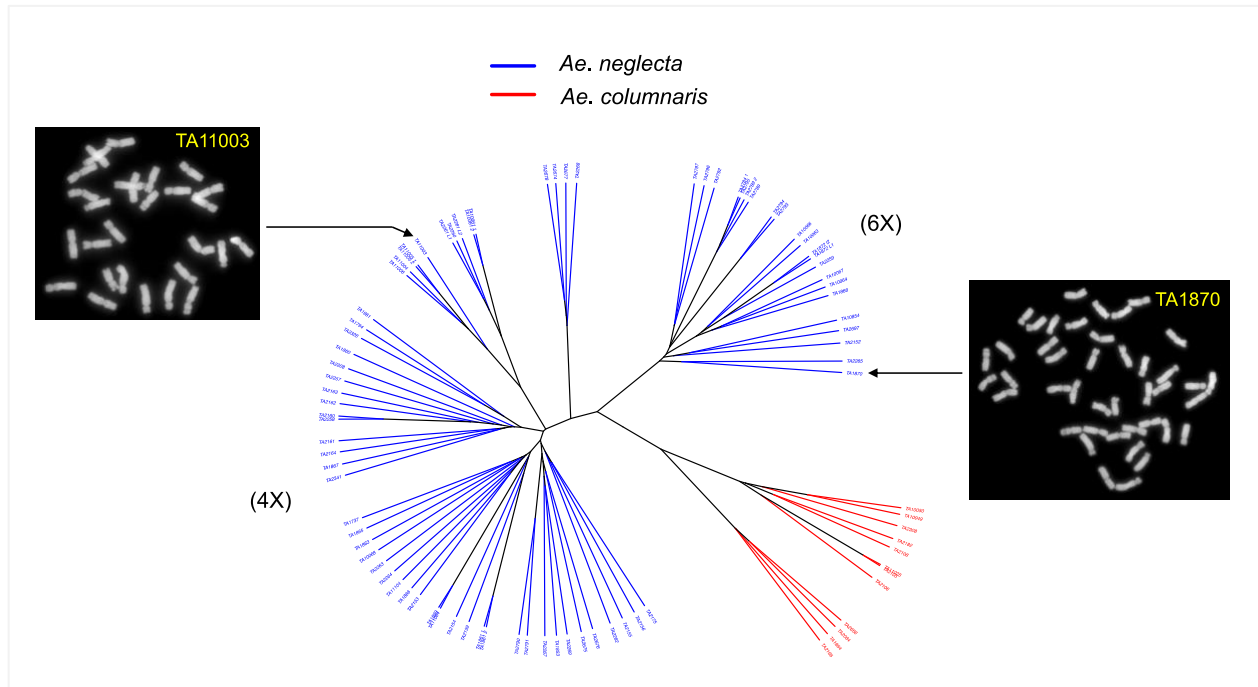

**Supplementary Figure S1.** The GBS SNP based unrooted neighbor-joining (NJ) tree separating tetraploid and hexaploid accessions of *Ae. neglecta* (blue clade) and the chromosome counts of two representative individuals from each 4X and 6X sub-clade of the *Ae. neglecta*. The other sister species *Ae. columnaris* accessions are shown in the red-colored clade.

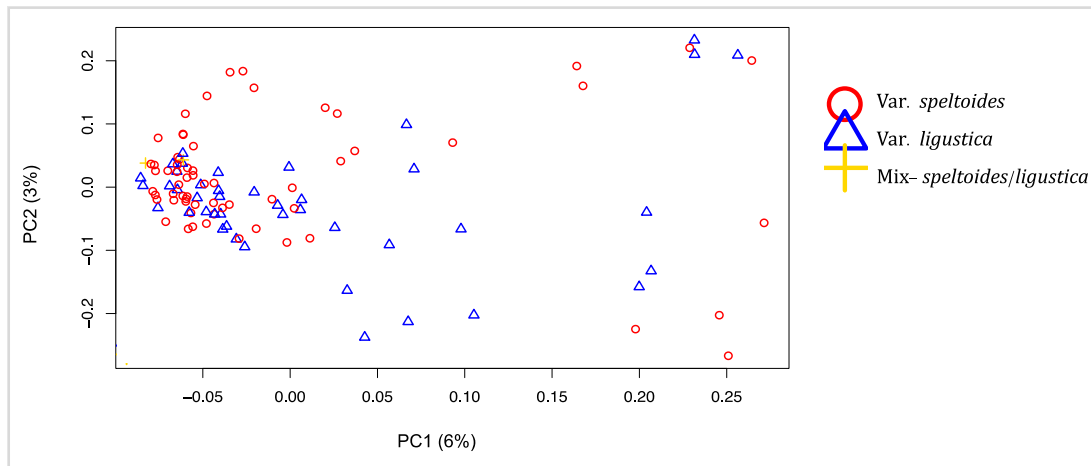

**Supplementary Figure S2.** Principal component analysis (PCA) plot showing two forms of *Ae. speltoides*; *var. speltoides* and *ligustica*. No separate PCA cluster was observed for each of the groups.

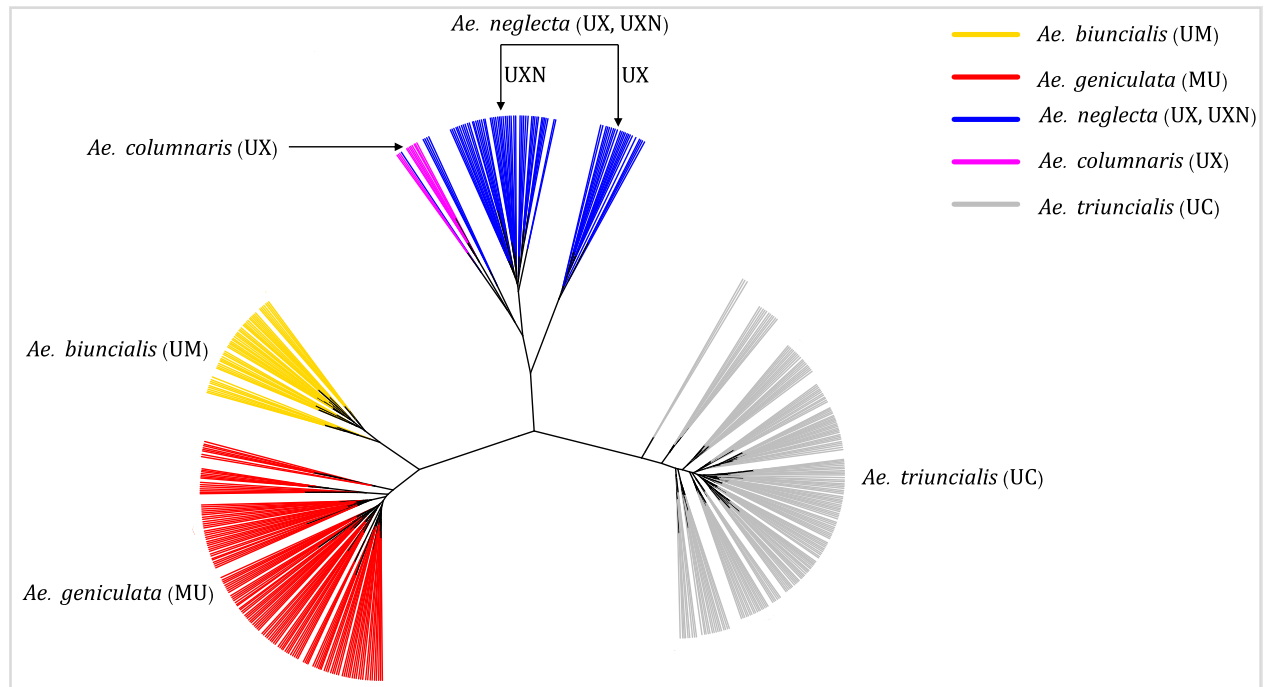

**Supplementary Figure S3.** An unrooted neighbor-joining (NJ) tree separating some tetraploid *Aegilops* accessions containing two species whose genome formula is controversial, the *Ae. neglecta* and *Ae. columnaris*. These two species clustered in the middle of UM genome clade and UC genome clade. The M genome (now proposed X) was a part of traditional *Ae. neglecta* and *Ae. columnaris* genome formula.

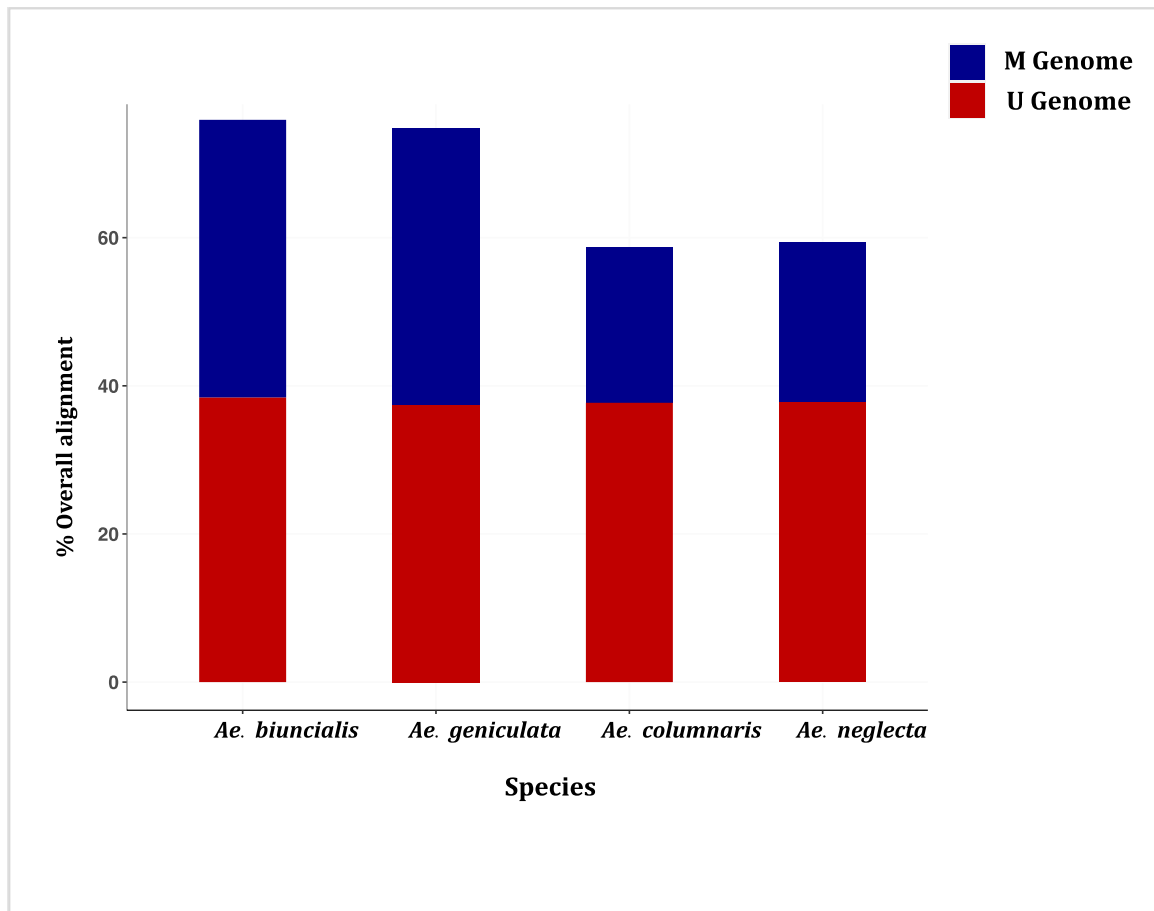

**Supplementary Figure S4.** The bar chart showing the overall sequence read alignment of four tetraploid *Aegilops* species; *Ae. biuncialis*, *Ae. geniculata*, *Ae. columnaris* and *Ae. neglecta* when aligned on M and U genome *de novo* mock reference.

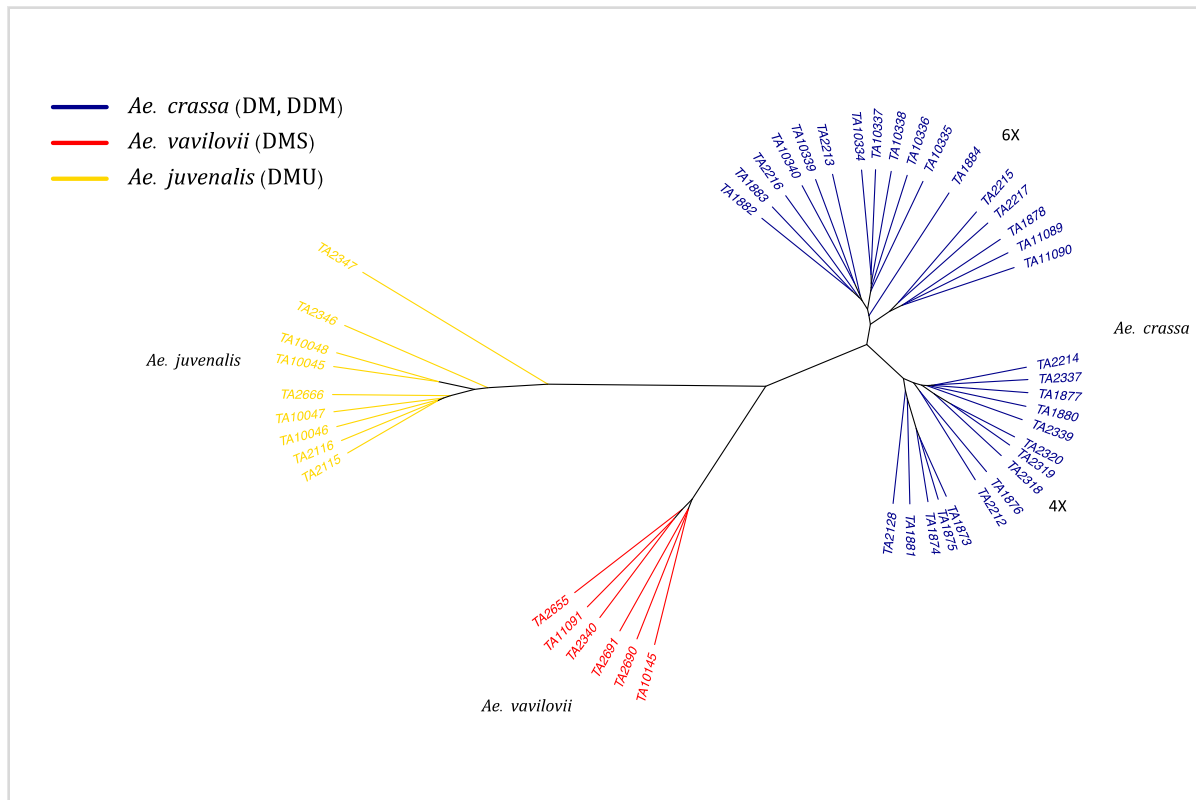

**Supplementary Figure S5.** An unrooted neighbor-joining (NJ) tree of *Ae. juvenalis*, *Ae. crassa* and *Ae. vavilovii*. The tree branches were colored based on the accession's taxon. The *Ae. crassa* branches we annotated as 4x or 6x based on cytological chromosome counting. The grouping clearly separated 6X and 4X *Ae. crassa*.

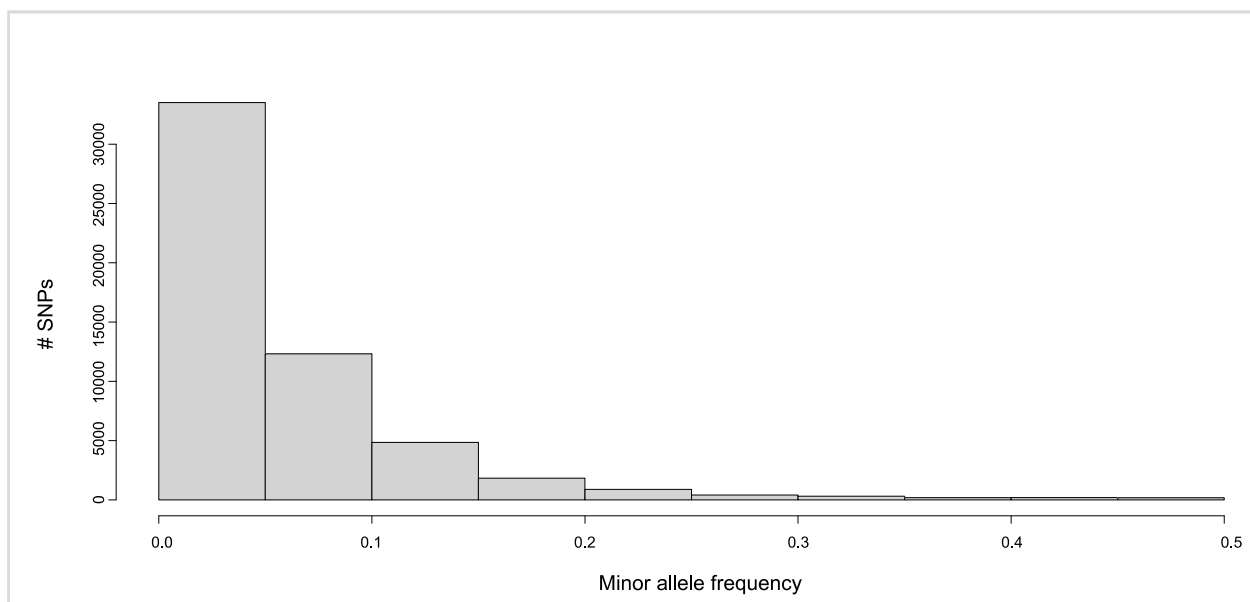

**Supplementary Figure S6.** Minor allele frequency (MAF) distribution within the loci for the entire *Aegilops* collection. Most of the loci had a very low MAF.

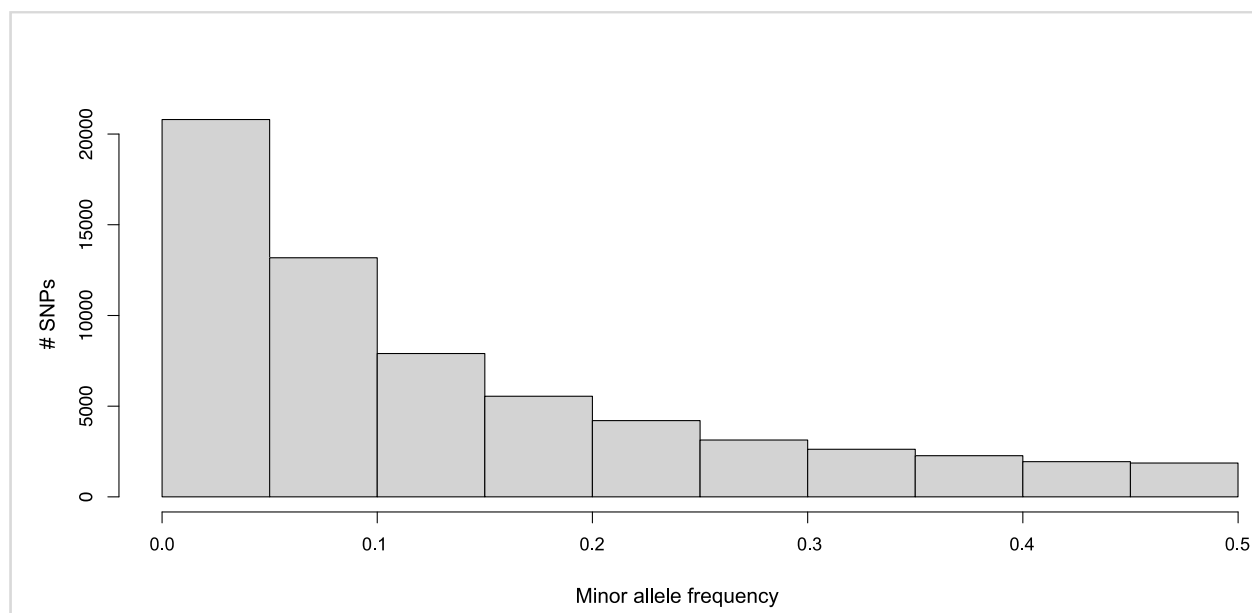

**Supplementary Figure S7.** Distribution of minor alleles frequency (MAF) for segregating variants in *Ae. speltoides*.



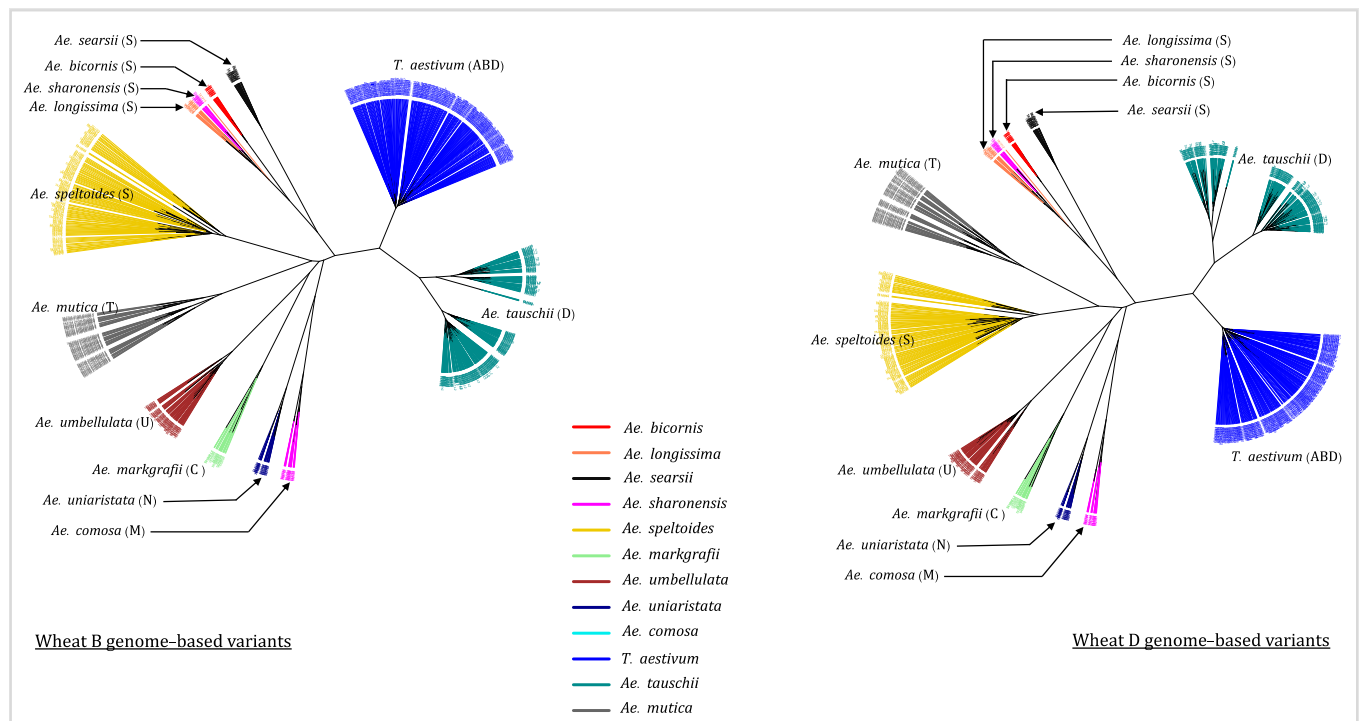

**Supplementary Figure S8.** An unrooted neighbor-joining (NJ) tree constructed using the genotyping information generated by using wheat B genome as a reference (left); and the unrooted NJ tree constructed using genotyping profile generated using the wheat D genome as a reference (right). The clades were colored based on genetic clustering.

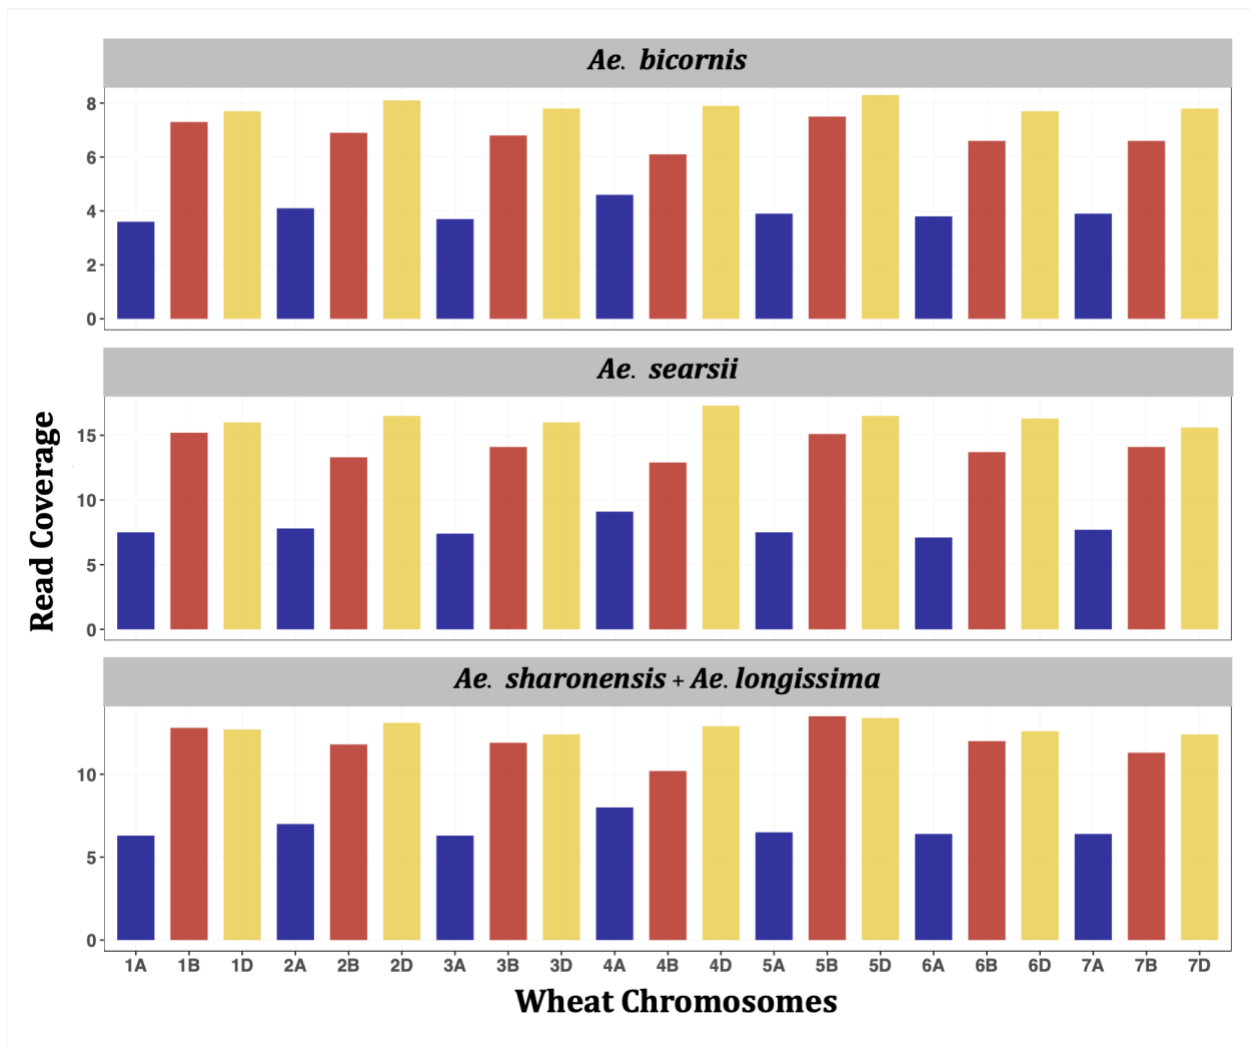

**Supplementary Figure S9.** Bar charts showing genomic relations between the *Sitopsis* section *Aegilops* (except *Ae. speltoides*) and the wheat. The number of reads coverage (mapped per 1 Mb wheat genome) are shown for all wheat chromosomes. *Ae. sharonensis* and *Ae. longissima* appeared as highly genetically similar so their sequences were mapped together.

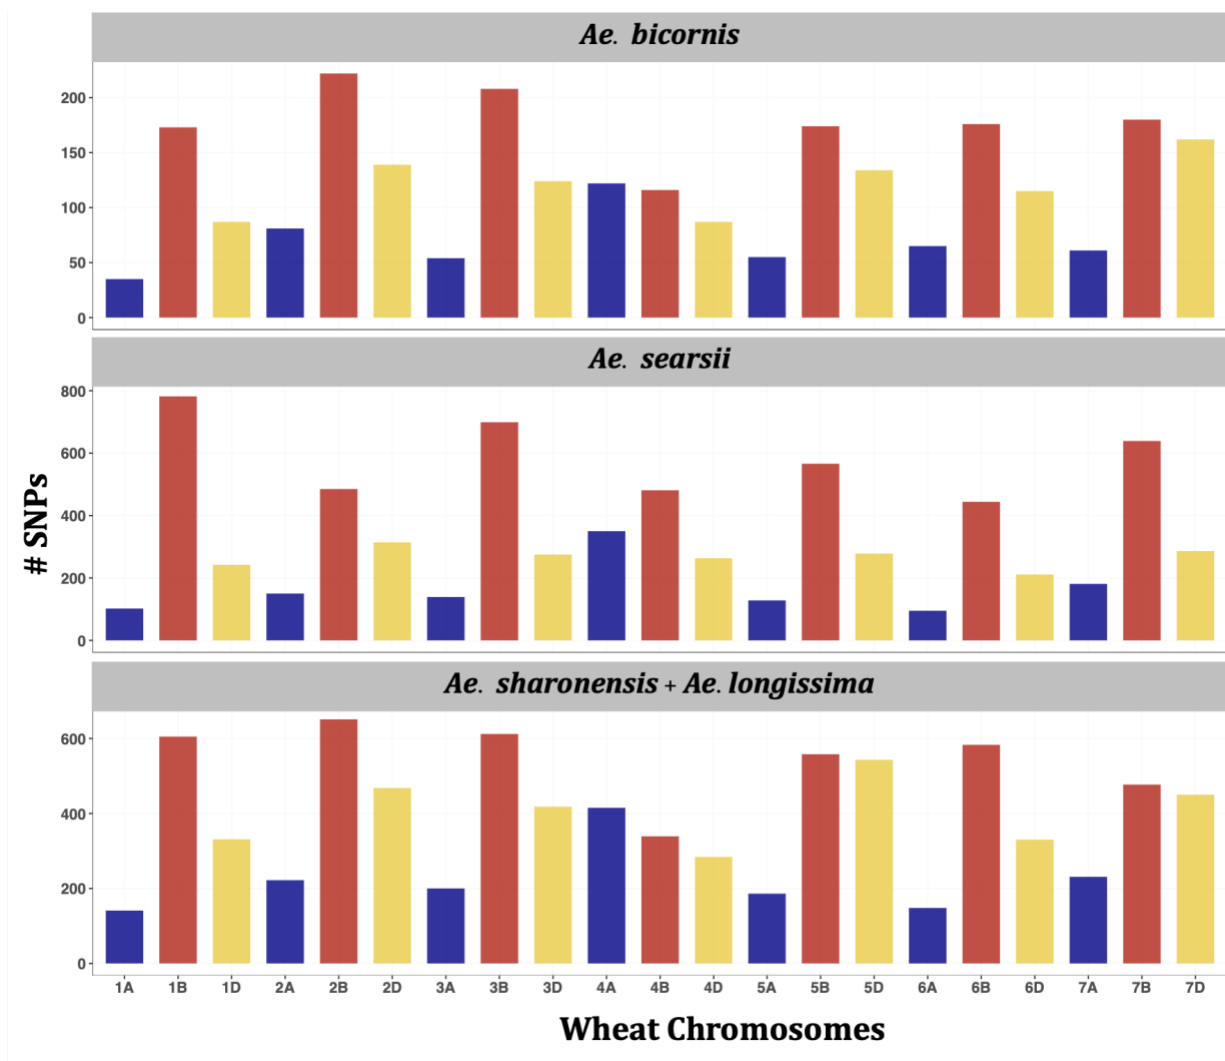

**Supplementary Figure S10.** Bar charts showing genomic relations between the *Sitopsis* section *Aegilops* (except *Ae. speltoides*) and the wheat. The number of variants (# SNPs) identified per wheat chromosome for the four species are shown. *Ae. sharonensis* and *Ae. longissima* appeared as highly genetically similar so their SNPs were called together.

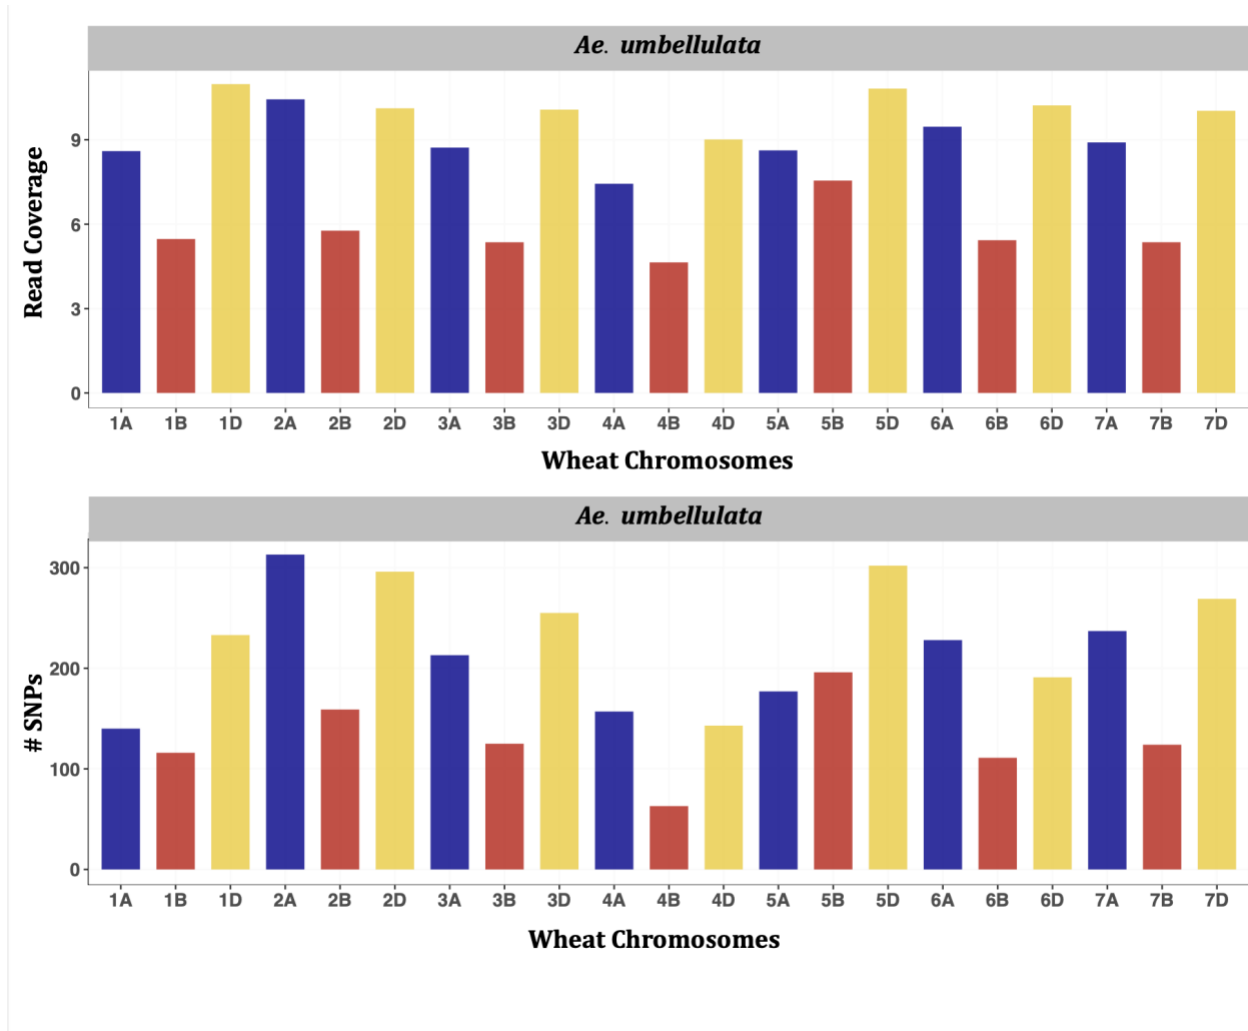

**Supplementary Figure S11.** Bar chart showing genomic relation between U genome diploid *Ae. umbellulata* and wheat. The average number of *Ae. umbellulata* sequence reads mapped per Mb of the wheat genome (upper panel), and numbers of *Ae. umbellulata* variants mapped on the respective wheat chromosomes (lower panel).

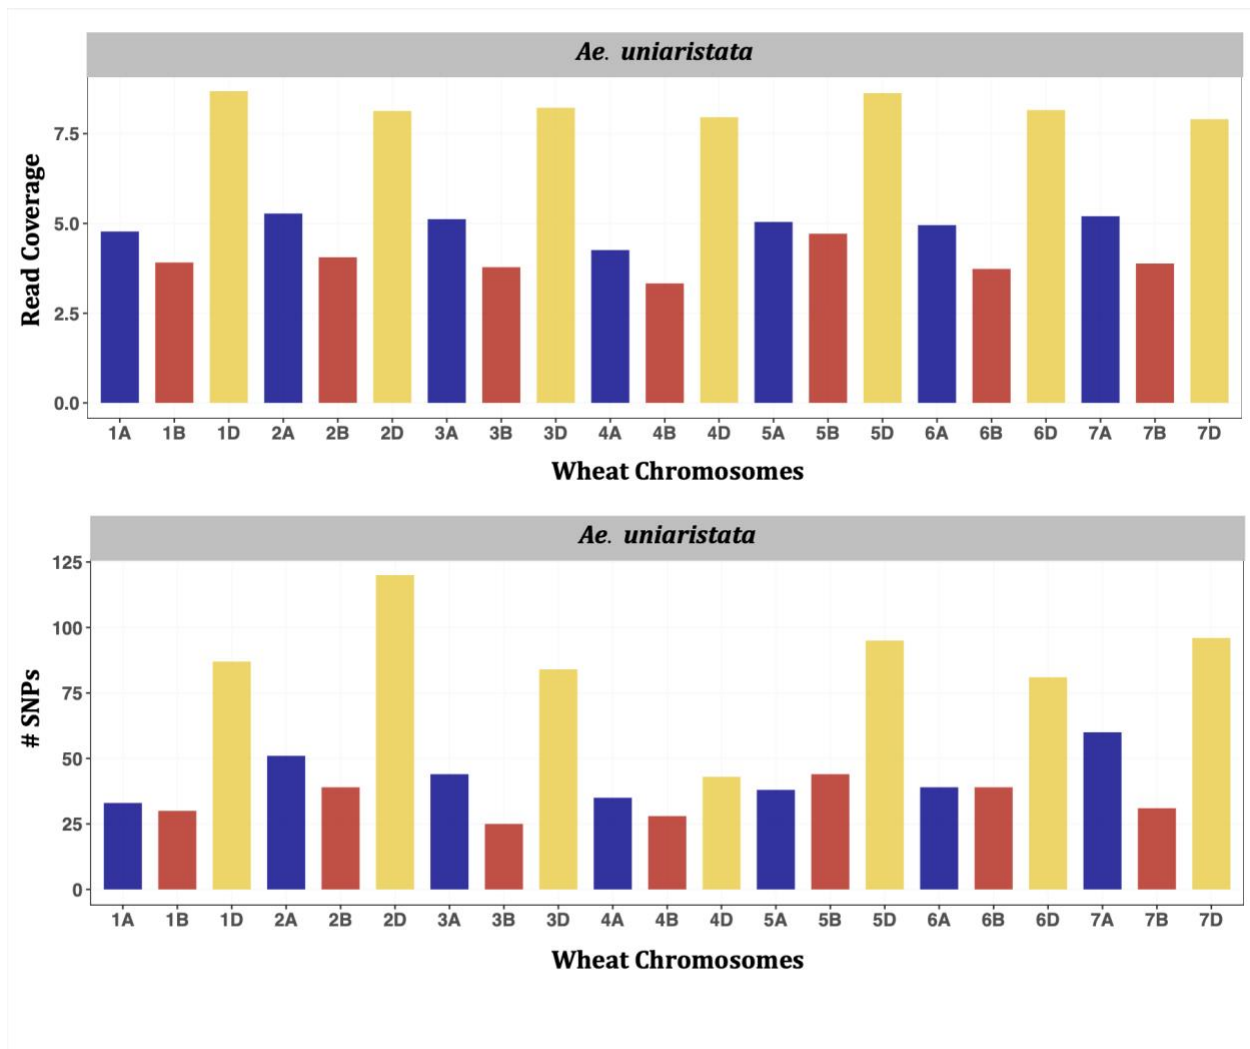

**Supplementary Figure S12.** Bar chart showing genomic relation between N genome diploid *Ae. uniaristata* and wheat. The average number of *Ae. uniaristata* sequence reads mapped per Mb of the wheat genome (upper panel), and numbers of *Ae. uniaristata* variants mapped on the respective wheat chromosomes (lower panel).

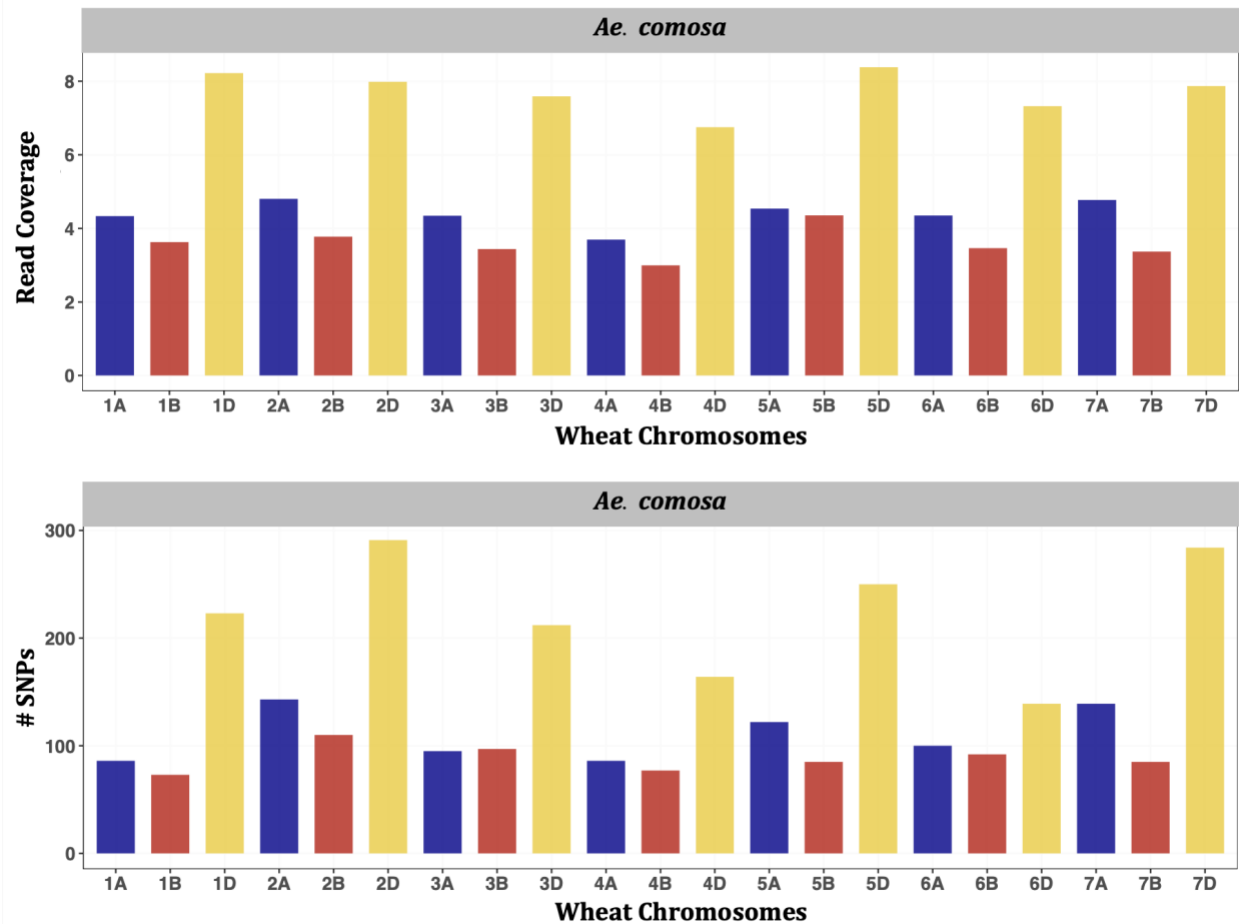

**Supplementary Figure S13.** Bar chart showing genomic relation between M genome diploid *Ae. comosa* and wheat. The average number of *Ae. comosa* sequence reads mapped per Mb of the wheat genome (upper panel), and numbers of *Ae. comosa* variants mapped on the respective wheat chromosomes (lower panel).

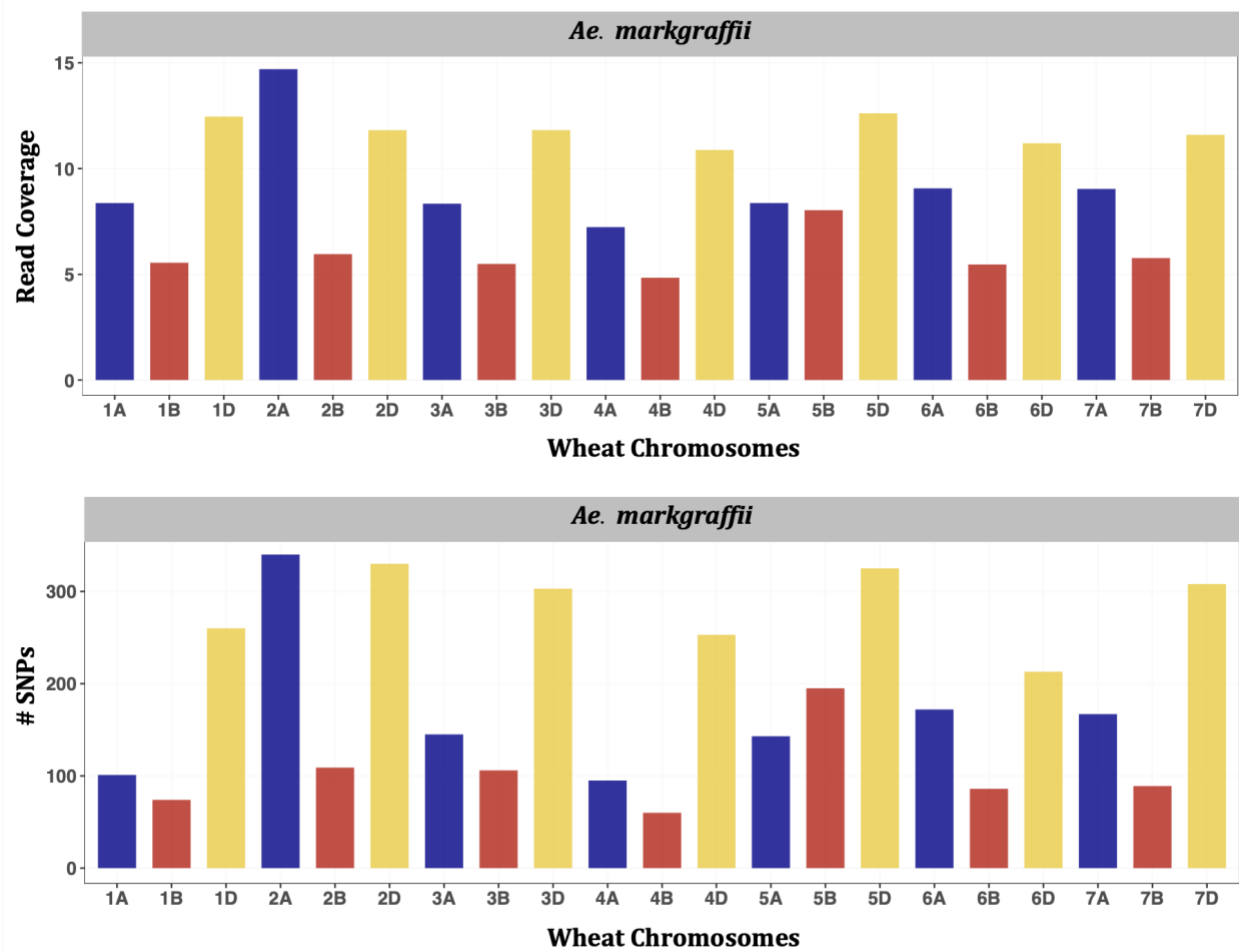

**Supplementary Figure S14.** Bar chart showing genomic relation between C genome diploid *Ae. markgraffii* and wheat. The average number of *Ae. markgraffii* sequence reads mapped per Mb of the wheat genome (upper panel), and numbers of *Ae. markgraffii* variants mapped on the respective wheat chromosomes (lower panel).

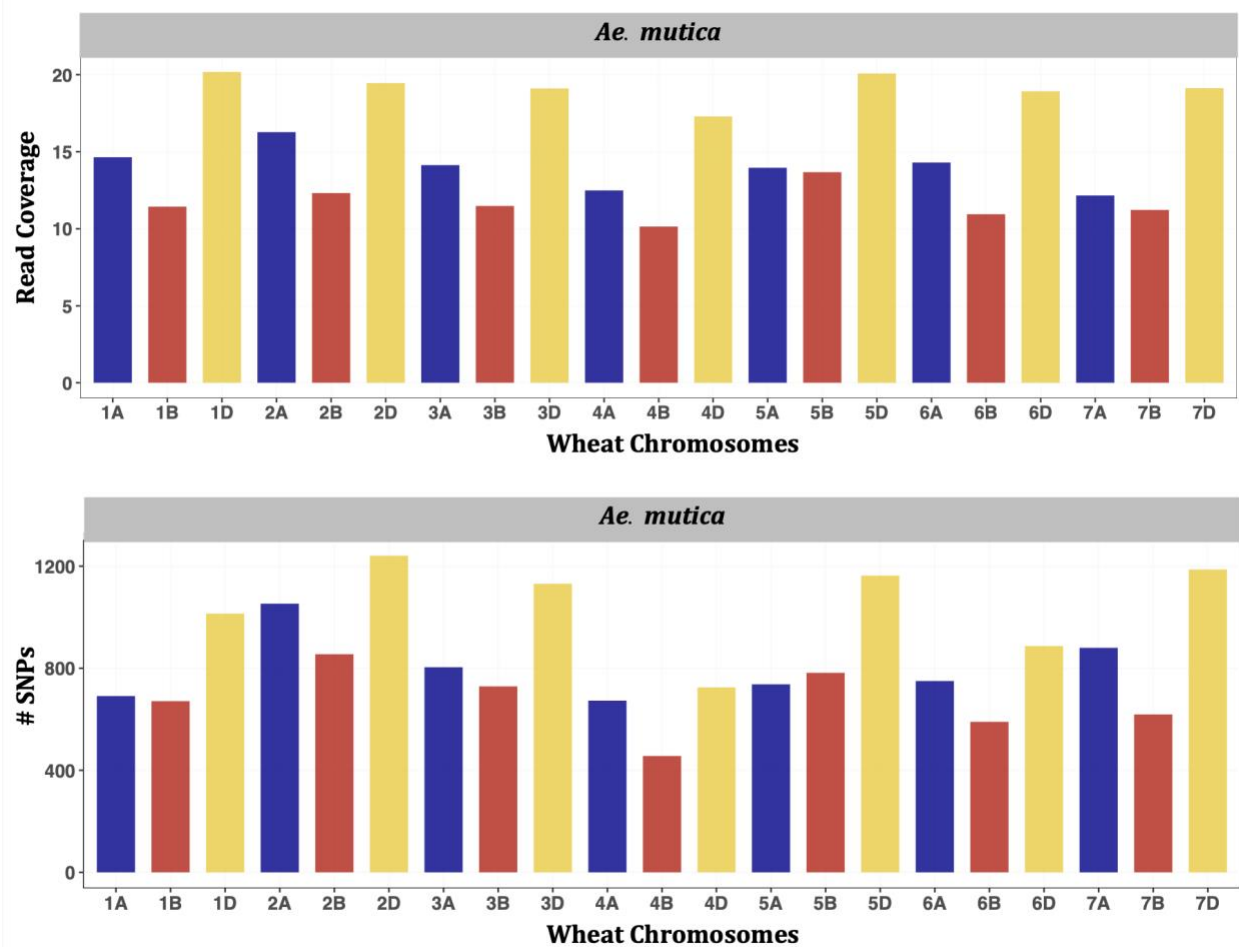

**Supplementary Figure S15.** Bar charts showing genomic relations between *Ae. mutica* and wheat. The average number of *Ae. mutica* sequence reads mapped per Mb of the wheat genome (upper panel), and numbers of *Ae. mutica* variants mapped on the respective wheat chromosomes (lower panel).



## Supplementary Tables

**Supplementary Table S1.** List of *Aegilops* germplasms in the WGRC gene bank collection with the taxa and origins of the accessions.

[external file]

**Supplementary Table S2.** Misclassified and genetically identical (redundant) *Aegilops* accessions. The redundant accession was determined for only those diploid species collections whose genotyping was based on the variants called on their reference genome.

[external file]

**Supplementary Table S3.** Different SNP matrices, population genotyped, the reference sequence used and the application which used the SNP matrix.

| Species                                          | Total Accessions | Reference/Mock Reference genome Source Species                                        | Total Filtered SNPs | Analysis    |
|--------------------------------------------------|------------------|---------------------------------------------------------------------------------------|---------------------|-------------|
| All 23 species                                   | 1051             | <i>De novo</i> : derived from sequence reads representing all <i>Aegilops</i> genomes | 54667               | Gbc, PA, GR |
| All 23 species                                   | 1041             | After filtration: (MAF > 0.01, missing <30%, heterozygosity <10%)                     | 46879               | Gbc, PA, GR |
| All U genome species                             | 596              | <i>De novo</i> : from <i>Ae. umbellulata</i> sequence reads                           | 18653               | Gbc, PA, GR |
| <i>Ae. neglecta</i> and <i>Ae. columnaris</i>    | 88               | <i>De novo</i> : from <i>Ae. neglecta</i> and <i>Ae. columnaris</i> sequence reads    | 21035               | Gbc         |
| <i>Ae. umbellulata</i> (U)                       | 58               | <i>De novo</i> : from <i>Ae. umbellulata</i> sequence reads                           | 18653               | GR          |
| <i>Ae. comosa</i> (M)                            | 17               | <i>De novo</i> : from <i>Ae. comosa</i> sequence reads                                | 23304               | GR          |
| S-genome diploids and <i>Ae. mutica</i>          | 214              | <i>Ae. speltoides</i> reference genome                                                | 13553               | Gbc, PA     |
| <i>Ae. searsii</i>                               | 18               | <i>Ae. searsii</i> reference genome                                                   | 11663               | Gbc         |
| <i>Ae. sharonensis</i> and <i>Ae. longissima</i> | 23               | <i>Ae. sharonensis</i> reference genome                                               | 19000               | Gbc         |
| <i>Ae. bicornis</i>                              | 13               | <i>Ae. bicornis</i> reference genome                                                  |                     | Gbc         |
| <i>Ae. tauschii</i>                              | 47               | <i>Ae. tauschii</i> reference genome                                                  | 28617               | Gbc         |
| <i>Ae. speltoides</i>                            | 97               | Chinese spring wheat reference genome                                                 | 23281               | GR          |
| <i>Ae. searsii</i>                               | 18               | Chinese spring wheat reference genome                                                 | 7114                | GR          |
| <i>Ae. sharonensis</i> and <i>Ae. longissima</i> | 23               | Chinese spring wheat reference genome                                                 | 8192                | GR          |
| <i>Ae. bicornis</i>                              | 13               | Chinese spring wheat reference genome                                                 | 2570                | GR          |
| <i>Ae. mutica</i>                                | 54               | Chinese spring wheat reference genome                                                 | 17638               | GR          |
| <i>Ae. umbellulata</i>                           | 58               | Chinese spring wheat reference genome                                                 | 4048                | GR          |
| <i>Ae. uniaristata</i>                           | 24               | Chinese spring wheat reference genome                                                 | 1142                | GR          |
| <i>Ae. comosa</i>                                | 17               | Chinese spring wheat reference genome                                                 | 2853                | GR          |
| <i>Ae. markgraffii</i>                           | 16               | Chinese spring wheat reference genome                                                 | 3874                | GR          |

Gbc = Gene bank curation

PA = Population analysis

GR = Genome relation

**Supplementary Table S4.** *Sitopsis* section *Aegilops* and *Ae. mutica* pairwise  $F_{ST}$  values. The higher values indicate more genetic differentiation and lower values indicate a lower genetic differentiation between pairs.

|                        | <i>Ae.</i><br><i>longissima</i> | <i>Ae. searsii</i> | <i>Ae.</i><br><i>sharonensis</i> | <i>Ae.</i><br><i>mutica</i> | <i>Ae. speltoides</i> |
|------------------------|---------------------------------|--------------------|----------------------------------|-----------------------------|-----------------------|
| <i>Ae. bicornis</i>    | 0.027                           | 0.057              | 0.027                            | 0.073                       | 0.085                 |
| <i>Ae. longissima</i>  |                                 | 0.054              | 0.006                            | 0.067                       | 0.079                 |
| <i>Ae. searsii</i>     |                                 |                    | 0.055                            | 0.075                       | 0.088                 |
| <i>Ae. sharonensis</i> |                                 |                    |                                  | 0.068                       | 0.081                 |
| <i>Ae. mutica</i>      |                                 |                    |                                  |                             | 0.065                 |

**Supplementary Table S5.** Total segregating loci in UM and UX genome species when called variants on the M genome and U genome mock references independently.

| Species                       | No. of individuals | Segregating loci  |                   |
|-------------------------------|--------------------|-------------------|-------------------|
|                               |                    | M-genome variants | U-genome variants |
| <i>Ae. comosa</i>             | 17                 | 23304             | -                 |
| <i>Ae. biuncials</i> (UM)     | 53                 | 11598 (50%)       | 15380 (83%)       |
| <i>Ae. geniculata</i> (MU)    | 143                | 10590 (46%)       | 11331 (61%)       |
| <i>Ae. columnaris</i> (UX)    | 12                 | 2287 (10%)        | 9849 (53%)        |
| <i>Ae. neglecta</i> (UX, UXN) | 76                 | 5467 (24%)        | 12013 (65%)       |
| <i>Ae. umbellulata</i> (U)    | 58                 | -                 | 18653             |
