# Supplementary material for: Genomic characterization and gene bank curation of Aegilops: the wild relatives of wheat
Source: Frontiers journal article supplement (doi:10.3389/fpls.2023.1268370), 2023-10-17
Supplement: Table_1.xlsx [file Table_1.xlsx]

## Sheet: Aegilops_Section
Supplementary Table S1: Aegilops accessions preserved in the Wheat Genetics Resource Center (WGRC), Kansas State University
Each sheet includes accessions of one Aegilops section as classified by van Slagerene (1994)
There are five sections within the genus Aegilops: Aegilops, Comopyrum, Cylindropyrum, Sitopsis and Vertebrata based on van Slagerene (1994) nomenclature.
1) Section Aegilops: Ae. umbellulata, Ae. kotschyi, Ae. peregrina, Ae. triuncialis, Ae. columnaris, Ae. biuncialis, Ae. neglecta, and Ae. geniculata
2) Section Comopyrum: Ae. comosa, and Ae. uniaristata
3) Section Cylindropyrum: Ae. markgraffii, Ae. caudata, Ae. cylindrica
4) Section Sitopsis: Ae. bicornis, Ae. searsii, Ae. sharonensis, Ae. longissima, and Ae. speltoides
5) Section Vertebrata: Ae. tauschii, Ae. juvenalis, Ae. crassa, Ae. ventricosa and Ae. vavilovii
6) Ae. mutica
7) Ae. tauschii Collection: These are the tauschii lines curated previously [https://pubmed.ncbi.nlm.nih.gov/30740115/] and are used here just to study the genomics relationships between all diploid Aegilops and the wheat subgenomes B and D
8) CIMMYT wheat lines: CIMMYT wheat lines tested for the genetic relationships between wheat and diploid Aegilops
Note: van Slagerene (1994) put Ae. mutica as a separate genus Amblyopyrum muticum, however, several recent studies including this study showed that it this species should be listed under the genus Aegilops and is a sister species of Ae. spletoides
In this study, we have used Ae. mutica instead of Am. muticum
A) Aegilops_Section
S.N.	Accession ID	Species	Sub Taxa	Accession Name	Donor Number	Collection_Country	Collection Site	Latitude	Longitude	Elevation
1	TA1957	Ae. biuncialis		USA109	G596	TUR	Izmir; 15 km SW of Manisa	38.5433	27.2873	490
2	TA1958	Ae. biuncialis		USA628	84TK067-017	TUR	Kitlis; 24 km NW of Kilis	36.8148	36.9305	500
3	TA1959	Ae. biuncialis		USA628	84TK150-004	TUR	Usak; 1 km E of junction to Selendi on the Izmir highway	38.6198	28.8697	490
4	TA1960	Ae. biuncialis		USA109	G597	ISR	Jerusalem; Campus of Jerusalem University	31.7711	35.2274	756
5	TA1962	Ae. biuncialis		USA109	G1219	TUR	Denizli; 28 km NW of Denizli	37.9615	28.9078	150
6	TA1963	Ae. biuncialis		USA109	G731	CAN	University of Manitoba; Winnipeg
7	TA1964	Ae. biuncialis		USA628	84TK153-005	TUR	Izmir; Bergama; stop 2 on a hill overlooking valley; remains of Roman theater on hillside	39.1167	27.1833	65
8	TA1972	Ae. biuncialis		USA628	84TK154-021	TUR	Izmir; Agean Agricultural Research Institute Genebank; Menemen			30
9	TA1991	Ae. biuncialis		USA628	84TK213-004	TUR	Canakkale; 7 km NE Canakkale; in route to Lapseki	40.1773	26.4839	80
10	TA2000	Ae. biuncialis		USA628	84TK230-004	TUR	Bursa; 11 km NW of Karacabey	40.235	28.2383	20
11	TA2073	Ae. biuncialis		USA628	84TK238-003	TUR	Bursa; 23 km NW of Gemlik	40.5065	29.3156	50
12	TA2074	Ae. biuncialis		USA628	84TK242-006	TUR	Yalova; 15 km W of Cinarcik	40.6207	28.9565	75
13	TA2077	Ae. biuncialis		USA628	84TK430-003	TUR	Malatya	38.9936	37.793	1500
14	TA2078	Ae. biuncialis		USA628	84TK443-006	TUR	Elazig	38.8473	38.6454	1000
15	TA2079	Ae. biuncialis		USA628	84TK072-013	TUR	Gaziantep; 19 km N of Gaziantep toward Yavuzeli	37.2347	37.5101	800
16	TA2080	Ae. biuncialis		USA628	84TK076-032	TUR	Gaziantep	37.5176	37.7107	820
17	TA2081	Ae. biuncialis		USA628	84TK027-063.01	TUR	Antalya; 4 km SW of Korkuteli	37.0541	30.1776	1100
18	TA2082	Ae. biuncialis		USA628	84TK028-070.0	TUR	Antalya; 10 km E of Korkuteli	37.0058	30.2769	900
19	TA2083	Ae. biuncialis		USA628	84TK065-014.0	TUR	Gaziantep	36.8351	36.7163	500
20	TA2168	Ae. biuncialis		USA628	M88-83	SYR	Halab (Aleppo); ICARDA
21	TA2169	Ae. biuncialis		USA628	M88-83-1	SYR	Halab (Aleppo); ICARDA
22	TA2349	Ae. biuncialis		USA109	G1192	TUR	Kirsehir; 4 km NW of Kirsehir	39.1583	34.1228	1020
23	TA2658	Ae. biuncialis		USA628	84TK144-048	TUR	Kahraman Maras; 14 km SE of Kahraman Maras	37.4836	37.0432	515
24	TA2659	Ae. biuncialis		USA628	CN 400026	SYR	Dimashq (Damascus); Zabadani (Az-Zabadani); 2 km NW of Damascus from Nabe'a Barada to Rawda	33.6639	36.05	1180
25	TA2661	Ae. biuncialis		USA628	CN 400031a	SYR	Halab (Aleppo); ICARDA
26	TA2662	Ae. biuncialis		USA628	CN 400018	SYR	Halab (Aleppo); On rocky hillside 8 km from Sarmada on road to Harem; limestone hill after Sarmarda valley	36.2	36.6333	550
27	TA2663	Ae. biuncialis		USA628	CN 400066	SYR	Idlib (Idleb); Kafer Kharim; on road to Harem	36.1133	36.5114	400
28	TA2664	Ae. biuncialis		USA628	CN 400067	SYR	Idlib (Idleb); Kafer Kharim; on road to Harem	36.1133	36.5114	400
29	TA2782	Ae. biuncialis		USA359	8917-2	XKX	Unknown
30	TA2783	Ae. biuncialis		USA628	85YG005-002	BIH	Herzegovina; 2 km E of Mostar on Highway 17	43.3347	17.8209	700
31	TA2784	Ae. biuncialis		USA628	85YG005-003	BIH	Herzegovina; 2 km E of Mostar on Highway 17	43.3347	17.8209	700
32	TA2785	Ae. biuncialis		USA628	85YG006-006	BIH	Herzegovina; 1 km E of Mostar	43.3348	17.8111	700
33	TA10057	Ae. biuncialis		DEU146	AE 762	LBY	Jabal al Akhdar; 1 km N of Qirnada	32.7434	21.9006	660
34	TA10058	Ae. biuncialis		DEU146	AE 736	AZE	Absheron/Baki; Pirshaga	40.5534	49.8864	-3
35	TA10059	Ae. biuncialis		DEU146	AE 751	TUR	Izmir; Agean Agricultural Research Institute gene bank; Menemen			30
36	TA10060	Ae. biuncialis		DEU146	AE 1045	GRC	Lesvos Island; Plagia	38.983	26.3971	44
37	TA10840	Ae. biuncialis		USA029	PI 219797	IRQ	Erbil; Salahadin Resort Area	36.4	44.2	1006
38	TA10841	Ae. biuncialis		USA029	PI 374323	SRB	Macedonia; Demir Kapija; Unknown	41.405	22.2489	129
39	TA10990	Ae. biuncialis		USA1004	12GE-003-1	GEO	Tbilisi	41.7085	44.8398	604
40	TA10991	Ae. biuncialis		USA1004	12AZ-002-5	AZE	Daghlig Shirvan [Qobustan]; 95 km W of Baku	40.5318	48.8967	804
41	TA10992	Ae. biuncialis		USA1004	12AZ-003-7	AZE	Daghlig Shirvan [Qobustan]; 103 km W of Baku	40.5297	48.7882	685
42	TA10993	Ae. biuncialis		USA1004	12AZ-003-8	AZE	Daghlig Shirvan [Qobustan]; 103 km W of Baku	40.5297	48.7882	685
43	TA10994	Ae. biuncialis		USA1004	12AZ-008-11B	AZE	Daghlig Shirvan [Agsu]; 15 km W of Agsu	40.6253	48.2494	328
44	TA10995	Ae. biuncialis		USA1004	12AZ-010-1	AZE	Naxcivan; Flood plain of Lizbit Darasri River	39.4515	45.3792	1261
45	TA10996	Ae. biuncialis		USA1004	12AZ-013-1A	AZE	Naxcivan; In riverbed of Lizbit Darasri River	39.3888	45.3436	1404
46	TA10997	Ae. biuncialis		USA1004	12AZ-014-1	AZE	Naxcivan; On mountainside above Lizbit Darasri River	39.5388	45.258	2121
47	TA11002	Ae. biuncialis		USA1004	12AZ-008-7B	AZE	Daghlig Shirvan [Agsu]; 15 km W of Agsu	40.6252	48.249	321
48	TA11024	Ae. biuncialis		USA288	P102	XKX	University of Missouri; Columbia
1	TA2084	Ae. columnaris		USA628	84TK053-132.01	TUR	Hatay; 1 km N of Iskenderum (Alexandretta)	36.6001	36.1969	50
2	TA2105	Ae. columnaris		USA109	G732	USA	Missouri; University of Missouri Columbia
3	TA2106	Ae. columnaris	var. typica	USA109	G954	TUR	Konya; Konya	37.8667	32.4833	1030
4	TA2108	Ae. columnaris		USA109	G599	TUR	Malatya; 30 km SW of Malatya	38.167	37.955	1215
5	TA2166	Ae. columnaris	var. columnaris	USA628	84TK040-108	TUR	Icel; 4 km E of Anamur at the Karan Motel; village of Bezdogan	36.1009	32.8922	100
6	TA2182	Ae. columnaris		USA628	84TK441-004	TUR	Malatya; 47 km N of Malatya	38.6712	38.3545	675
7	TA2656	Ae. columnaris		USA628	CN 400053	SYR	Idlib; 18 km from Sarmada	36.2167	36.5639	540
8	TA10049	Ae. columnaris		DEU146	AE 112	AZE	Naxcivan; Nakhchivan region	39.2035	45.4086	1340
9	TA10050	Ae. columnaris		DEU146	AE 113	ARM	Kotayk; Aboveensk region	40.049	44.5475	1750
10	TA10051	Ae. columnaris	var. glabriuscula	DEU146	AE 286	PRT	Unknown
11	TA10052	Ae. columnaris	var. columnaris	DEU146	AE 546	IRN	Unknown
12	TA11025	Ae. columnaris		USA288	P100	XKX	University of Missouri; Columbia
1	TA1701	Ae. geniculata		USA628	84TK053-133.03	TUR	Hatay (Antakya); 1 km N of Iskenderum (Alexandretta)	36.6001	36.1969	50
2	TA1702	Ae. geniculata		USA109	G769	ROU	Gradina Botanica; Cluj
3	TA1710	Ae. geniculata		USA628	84TK054-136	TUR	Hatay (Antakya 4 km SE of Iskenderum (Alexandretta)	36.5405	36.1526	250
4	TA1711	Ae. geniculata		USA109	G422	TUR	Kirklareli; Babaeski	41.4325	27.0931	51
5	TA1720	Ae. geniculata		USA109	G393	TUR	Kocaeli (Izmit); Agricultural School at Cayirova	40.8299	29.3889	85
6	TA1721	Ae. geniculata		USA628	84TK056-143	TUR	Hatay (Antakya); 10 km SW Antakya	36.1473	36.0592	180
7	TA1797	Ae. geniculata		USA628	84TK154-025	TUR	Izmir; Agean Agriultural Research Institute Gene Bank; Menemen
8	TA1798	Ae. geniculata		USA109	G419	TUR	Canakkale; 5 km S of Gelibolu	40.3833	26.6167	51
9	TA1799	Ae. geniculata		USA109	G420	TUR	Balikesir; 70 km E of Can	40.0833	27.5667	284
10	TA1800	Ae. geniculata		USA109	G421	TUR	Kirklareli; Babaeski	41.4325	27.0931	51
11	TA1801	Ae. geniculata		USA109	G610	TUR	Istanbul; 20 km S of Yalova	40.5232	29.315	185
12	TA1802	Ae. geniculata		USA109	G613	TUR	Izmir; 18 km N of Menemen	38.7535	26.9611	13
13	TA1803	Ae. geniculata		USA628	84TK201-005	TUR	Izmir; 0.5 km E of Aliaga; E edge of village	38.7938	26.9892	60
14	TA1804	Ae. geniculata		USA109	G1044	TUR	Osmaniye; 112 km E of Adana	37.191	36.3812	400
15	TA1805	Ae. geniculata		USA109	G1047	TUR	Gaziantep; 210 km E of Adana	37.1034	37.4414	1000
16	TA1806	Ae. geniculata		USA628	84TK202-009	TUR	Izmir; 22 km SE of Bergama	39.0484	27.0943	30
17	TA1807	Ae. geniculata		USA628	84TK242-005	TUR	Istanbul; 15 km W of Cinarcik	40.6207	28.9565	75
18	TA1808	Ae. geniculata		USA109	G1056	TUR	Gaziantep; 28 km E of Gaziantep	37.0354	37.7106	650
19	TA1809	Ae. geniculata		USA628	84TK265-003	TUR	Sakarya (Adapazari); 16 km N Osmaneli (1 km SW Mekece)	40.4426	30.051	50
20	TA1810	Ae. geniculata		USA109	G611	ISR	Jerusalem; Hebrew University campus; Jerusalem	31.7933	35.2436	815
21	TA1811	Ae. geniculata		USA109	G612	ISR	Jerusalem; Beit Hakerem; western outskirts of Jerusalem	31.7775	35.1894	787
22	TA1812	Ae. geniculata		USA628	84TK266-001	TUR	Sakarya (Adapazari); Pamukova	40.5086	30.17	25
23	TA1813	Ae. geniculata		USA109	G860	ITA	Instituto Orto Botanico; Rome
24	TA1814	Ae. geniculata		USA109	G767	ROU	Gradina Botanica; Cluj
25	TA1815	Ae. geniculata		USA109	G662	GBR	Department of Agricultural Botany; University of Reading
26	TA1816	Ae. geniculata		USA109	G710	CHE	Botanischer Garten der University; Zurich
27	TA1817	Ae. geniculata		USA109	G735	XKX	Unknown
28	TA1818	Ae. geniculata		USA628	84TK273-003	TUR	Kocaeli (Izmit); 4 km NE of Kandira	41.0977	30.1836	50
29	TA1819	Ae. geniculata	var. vulgaris	USA109	G950	JPN	Laboratory of Genetics; Kyoto University
30	TA1821	Ae. geniculata		USA109	G423	TUR	Kirsehir; 110 km SE of Ankara along Route 60	39.4765	33.8475	895
31	TA1879	Ae. geniculata		SYR002	IG 47431	JOR	Al Balqa (Balqa); 5 km N of Salt towards Zai	32.0881	35.7141	970
32	TA1997	Ae. geniculata		USA628	84TK228-005	TUR	Balikesir; 3 km E of Erdek	40.4015	27.8308	15
33	TA2040	Ae. geniculata		MAR071	OB 48	MAR	Tetouan; 51 km N of El Araich (Larache)	35.4987	-5.77606	85
34	TA2041	Ae. geniculata		MAR071	OB 49	MAR	Tetouan; 11 km N of El Araich (Larache)	35.2512	-6.08917	195
35	TA2042	Ae. geniculata		MAR071	OB 50	MAR	Tetouan; 11 km N of El Araich (Larache)	35.2512	-6.08917	195
36	TA2043	Ae. geniculata		MAR071	OB 55 57	MAR	Rabat; 25 km E of Avenue Oued Akrach	34.0151	-6.55609	160
37	TA2044	Ae. geniculata		MAR071	OB 57	MAR	Azilal; Tanant; Douar Abaynou	31.8633	-6.9397	875
38	TA2045	Ae. geniculata		MAR071	OB 58	MAR	Khenifra; Zaouit sheikh	32.9394	-5.6675	840
39	TA2046	Ae. geniculata		MAR071	OB 59	MAR	Khenifra; (Ait) Ouaoumana	32.7128	-5.80417	725
40	TA2048	Ae. geniculata		MAR071	OB 62	MAR	Khemisset; 35 km SE from Rabat to Rommani (Romani)	33.738	-6.72089	135
41	TA2049	Ae. geniculata		MAR071	OB 63	MAR	Khemisset; Rommani (Romani)	33.532	-6.60622	490
42	TA2050	Ae. geniculata		MAR071	OB 64	MAR	Khemisset; Maaziz	33.6667	-6.31667	220
43	TA2051	Ae. geniculata		MAR071	OB 65	MAR	Khemisset; Oulmes	33.4251	-6.00177	1180
44	TA2054	Ae. geniculata		MAR071	OB 70	MAR	Khenitra; Aguelmous	33.1587	-5.84558	1175
45	TA2056	Ae. geniculata		MAR071	OB 74	MAR	Khenitra; Khenifra	32.9394	-5.6675	840
46	TA2058	Ae. geniculata		MAR071	OB 77	MAR	Khenitra; Khenifra	32.9394	-5.6675	840
47	TA2059	Ae. geniculata		MAR071	OB 79	MAR	Khenitra; Khenifra	32.9394	-5.6675	840
48	TA2060	Ae. geniculata		MAR071	OB 80	MAR	Khenitra; Ain Leuh	33.2875	-5.33901	1460
49	TA2061	Ae. geniculata		MAR071	OB 82	MAR	Khenitra; Azrou	33.4414	-5.2248	1400
50	TA2062	Ae. geniculata		MAR071	OB 83	MAR	Khenitra; Timehdit (rural commune possibly between Ifrane and Azrou)	33.4658	-5.1622	1615
51	TA2063	Ae. geniculata		MAR071	OB 84	MAR	Khenitra; Timehdit (rural commune possibly between Ifrane and Azrou)	33.4658	-5.1622	1615
52	TA2066	Ae. geniculata		MAR071	OB 85	MAR	Khenitra; Ait Oufela	32.9292	-5.05206	1745
53	TA2068	Ae. geniculata		MAR071	OB 88	MAR	Khenitra; Midelt	32.6804	-4.73064	1470
54	TA2069	Ae. geniculata		MAR071	OB 90	MAR	Khenitra; Boumia	32.7167	-5.1	1510
55	TA2070	Ae. geniculata		MAR071	OB 91	MAR	Khenitra; Boumia	32.7167	-5.1	1510
56	TA2071	Ae. geniculata		MAR071	OB 92	MAR	Khenitra; El Kbab	32.7333	-5.51667	1380
57	TA2072	Ae. geniculata		MAR071	OB 93	MAR	Khenitra; El Kbab	32.7333	-5.51667	1380
58	TA2145	Ae. geniculata		USA628	84TK067-018.0	TUR	Gaziantep; 24 km NW of Kilis	36.8148	36.9305	500
59	TA2146	Ae. geniculata		USA628	84TK067-018.01	TUR	Gaziantep; 24 km NW of Kilis	36.8148	36.9305	500
60	TA2147	Ae. geniculata		USA628	84TK226-002	TUR	Balikesir; 12 km SE of Bandirma (just north of junction)	40.2693	28.0543	30
61	TA2183	Ae. geniculata		MAR071	OB 94	MAR	Khenitra; Khenifra	32.9394	-5.6675	840
62	TA2184	Ae. geniculata		MAR071	OB 95	MAR	Khenitra; Khenifra	32.9394	-5.6675	840
63	TA2185	Ae. geniculata		MAR071	OB 96	MAR	Khenitra; Mrirt	33.1667	-5.56667	1115
64	TA2187	Ae. geniculata		MAR071	OB 98	MAR	Khenitra; Mrirt	33.1667	-5.56667	1115
65	TA2188	Ae. geniculata		MAR071	OB 99	MAR	Khenitra; (Bled) Adarouch	33.5338	-5.46673	900
66	TA2189	Ae. geniculata		MAR071	OB 100	MAR	Beni Mellal; (El) Ksiba	32.5681	-6.03083	470
67	TA2191	Ae. geniculata		MAR071	OB 102	MAR	Beni Mellal; (El) Ksiba	32.5681	-6.03083	470
68	TA2219	Ae. geniculata		MAR071	OB 2	MAR	Rabat; 14 km E of Rabat to Meknes	34.031	-6.66252	155
69	TA2220	Ae. geniculata		MAR071	OB 3	MAR	Khemisset; Between Tifelt and Khemisset	33.8362	-6.18256	430
70	TA2221	Ae. geniculata		MAR071	OB 4	MAR	Meknes; 15 km E of Meknes to Fes	33.924	-5.38742	535
71	TA2222	Ae. geniculata		MAR071	OB 6	MAR	Meknes; Edge (sortie) of Mhaya south toward Taoujdate	33.9783	-5.24331	395
72	TA2223	Ae. geniculata		MAR071	OB 7	MAR	Meknes; 14 km S of Meknes toward El Hajeb	33.7666	-5.48904	700
73	TA2225	Ae. geniculata		MAR071	OB 9	MAR	Meknes; Edge (sortie) of El Hajeb toward Azrou	33.6889	-5.37231	990
74	TA2227	Ae. geniculata		MAR071	OB 11	MAR	Meknes; 20 km S of El-Hajeb to Azrou	33.5425	-5.32013	1370
75	TA2232	Ae. geniculata		MAR071	OB 18	MAR	Fes; Station Annasseur; Sefrou	33.8292	-4.84051	840
76	TA2235	Ae. geniculata		MAR071	OB 21	MAR	Fes; 20 km E of Sefrou toward El Menzeh	33.8385	-4.63898	535
77	TA2237	Ae. geniculata		MAR071	OB 23	MAR	Oujda; 12 km S of Oujda at Xent village	34.599	-2.01084	670
78	TA2238	Ae. geniculata		MAR071	OB 24	MAR	Oujda; 3 km from Beni Draar	34.8864	-2.01204	455
79	TA2239	Ae. geniculata		MAR071	OB 25	MAR	Oujda; 8 km from Berkane toward Taforalt	34.8702	-2.42798	250
80	TA2240	Ae. geniculata		MAR071	OB 26	MAR	Oujda; 4 km from Taforalt	34.8414	-2.41734	350
81	TA2241	Ae. geniculata		MAR071	OB 27	MAR	Nador; 8 km from Zegangenhane (Zegangen) to Izarroren (Azaren)	35.1637	-3.09643	110
82	TA2242	Ae. geniculata		MAR071	OB 28	MAR	Nador; 15 km from El Hoceima toward Driouch	35.0485	-2.96013	115
83	TA2245	Ae. geniculata		MAR071	OB 31	MAR	Al Hoceima; 1 km past Beni Abdellah (N of Ikadaben) between Al Hoceima and Targuist	35.0834	-4.02237	375
84	TA2247	Ae. geniculata		MAR071	OB 35	MAR	Al Hoceima; 22 km W of Targuist	34.931	-4.49753	1545
85	TA2248	Ae. geniculata		MAR071	OB 37	MAR	Al Hoceima; Village of Ketama	34.9167	-4.56667	1495
86	TA2250	Ae. geniculata		MAR071	OB 39	MAR	Chechaouene; 14 km from Bab Berred	35.0356	-5.02212	1235
87	TA2251	Ae. geniculata		MAR071	OB 40	MAR	Chechaouene; 32 km from Chefchaouen	35.0648	-5.12924	955
88	TA2253	Ae. geniculata		MAR071	OB 44	MAR	Tetouan; 36 km S of Teotouan	35.3599	-5.36957	485
89	TA2255	Ae. geniculata		MAR071	OB 46	MAR	Tetouan; 46 km E of Tangier	35.5613	-5.44785	210
90	TA2256	Ae. geniculata		MAR071	OB 47	MAR	Teotouan; 1 km from the Dar Chaoui city limits (sortie)	35.5365	-5.72338	130
91	TA2647	Ae. geniculata		USA628	84TK313-003	TUR	Sinop; 1 km SE of Sarayduzu village	41.3219	34.8543	450
92	TA2648	Ae. geniculata		USA628	84TK371-005	TUR	Izmir; Agean Agricultural Research Station; Menemen
93	TA2650	Ae. geniculata		USA628	CN 400041	SYR	Halab (Aleppo); 95 km NE of Aleppo in the valley of Euphrates; between Manbij and Jarablus	36.6397	38.0386	350
94	TA2651	Ae. geniculata		USA628	CN 400045	SYR	Idleb; 1 km along a pre-Roman road; between Atareb and Bab El Hawa	36.1944	36.75	450
95	TA2652	Ae. geniculata		USA628	CN 400061	SYR	Idleb; Hillside at Kafer Halap; 20 km SW of Aleppo on road to Idleb	36.0656	36.865	400
96	TA2653	Ae. geniculata	var. ovata	USA628	CN 400083	SYR	Halab (Aleppo); 10 km from Azaz; left road after canal in Wadi Valley	36.6833	37	600
97	TA2654	Ae. geniculata		USA628	CN 400124	JOR	Al Balqa; 21 km SE of Damiya at junction to Salt	32.1	35.7	800
98	TA2786	Ae. geniculata		USA628	85YG006-005	BIH	Herzegovina; 1 km E of Mostar	43.3348	17.8111	700
99	TA2787	Ae. geniculata		USA628	85YG007-004	HRV	Dalmacija; Rugged area along secondary road E of Highway 2 in a 10 km loop to the NE of Trsteno	42.7268	17.9925	20-50
100	TA2899-1	Ae. geniculata		USA359	8551	ISR	Unknown
101	TA10002	Ae. geniculata		MAR071	OB 104	MAR	Beni Mellal; (El) Ksiba	32.5681	-6.03083	470
102	TA10003	Ae. geniculata		MAR071	OB 105	MAR	Beni Mellal; Tagelft	32.2391	-6.12325	1060
103	TA10004	Ae. geniculata		MAR071	OB 106	MAR	Beni Mellal; Tagelft	32.2391	-6.12325	1060
104	TA10005	Ae. geniculata		MAR071	OB 107	MAR	Beni Mellal; Ouaouizeght (Ouaouizerth)	32.1595	-6.35387	920
105	TA10006	Ae. geniculata		MAR071	OB 108	MAR	Beni Mellal; Ouaouizeght (Ouaouizerth)	32.1595	-6.35387	920
106	TA10007	Ae. geniculata		MAR071	OB 109	MAR	Azilal; Bin El Ouidane	32.1064	-6.45901
107	TA10008	Ae. geniculata		MAR071	OB 110	MAR	Azilal; Azilal	31.9661	-6.5657	1380
108	TA10009	Ae. geniculata		MAR071	OB 111	MAR	Azilal; Ait Hhamed (M'hamed)	31.8781	-6.47033	1665
109	TA10011	Ae. geniculata		MAR071	OB 113	MAR	Azilal; Tanant	31.8633	-6.9397	875
110	TA10012	Ae. geniculata		MAR071	OB 114	MAR	Azilal; Demnate	31.7333	-7	935
111	TA10014	Ae. geniculata		MAR071	OB 116	MAR	Azilal; Demnate	31.7333	-7	935
112	TA10015	Ae. geniculata		MAR071	OB 118	MAR	Marrakech; Barrage (Dam) Moulay Youssef	31.6451	-7.26643	875
113	TA10018	Ae. geniculata		MAR071	OB 121	MAR	Beni Mellal; Ouzoud	32.0152	-6.7189	780
114	TA10019	Ae. geniculata		MAR071	OB 122	MAR	Beni Mellal; Afourer	32.2071	-6.53831	600
115	TA10020	Ae. geniculata		MAR071	OB 123	MAR	Beni Mellal; Beni Mellal	32.337	-6.36246	515
116	TA10021	Ae. geniculata		MAR071	OB 124	MAR	Khemisset; Ezzhiliga	33.2915	-6.54365	720
117	TA10022	Ae. geniculata		MAR071	OB 125	MAR	Khemisset; Ezzhiliga	33.2915	-6.54365	720
118	TA10023	Ae. geniculata		MAR071	OB 126	MAR	Khemisset; Romani	33.5353	-6.60846	305
119	TA10024	Ae. geniculata		MAR071	OB 127	MAR	Khemisset; Sidi Bettache (Bettach)	33.5685	-6.8914	390
120	TA10025	Ae. geniculata		MAR071	OB 128	MAR	Marrakech; Ourika	31.3745	-7.79058	865
121	TA10026	Ae. geniculata		MAR071	OB 129	MAR	Marrakech; Ourika	31.3745	-7.79058	865
122	TA10027	Ae. geniculata		MAR071	OB 130	MAR	Marrakech; Oukaimiden	31.2027	-7.85856	2625
123	TA10029	Ae. geniculata		MAR071	OB 133	MAR	Marrakech; 20 km from Ait Ourir	31.5341	-7.4889	970
124	TA10030	Ae. geniculata		MAR071	OB 134	MAR	Marrakech; 40 km from Ait Ourir	31.3729	-7.40281	1500
125	TA10031	Ae. geniculata		MAR071	OB 135	MAR	Ourzazate; 102 km from Ourzazate at Agouim	31.1572	-7.46315	1720
126	TA10032	Ae. geniculata		MAR071	OB 136	MAR	Ourzazate; Agouim; center of town	31.1572	-7.46315	1720
127	TA10034	Ae. geniculata		MAR071	OB 138	MAR	Ourzazate; 20 km from Agouim	31.1235	-7.59945	1900
128	TA10035	Ae. geniculata		MAR071	OB 139	MAR	Ourzazate; Sour; center of town	31.1115	-7.59922	1925
129	TA10036	Ae. geniculata		MAR071	OB 140	MAR	Marrakech; Tit Chider; center of town (coordinants are a guess)	30.9361	-8.26987	1350
130	TA10037	Ae. geniculata		MAR071	OB 142	MAR	Marrakech; Tiz-n-test Pass (Tizi-n-test) station	30.982	-8.22824	2092
131	TA10038	Ae. geniculata		MAR071	OB 143	MAR	Marrakech; Tiz-n-test Pass (Tizi-n-test) station	30.982	-8.22824	2092
132	TA10039	Ae. geniculata		MAR071	OB 144	MAR	Marrakech; Asni; center of town	31.25	-7.98333	1040
133	TA10040	Ae. geniculata		MAR071	OB 145	MAR	Agadir; 80 km S of Essaouira	30.7339	-9.82796	150
134	TA10041	Ae. geniculata		MAR071	OB 146	MAR	Essaouira; 70 km S of Essaouira	30.8916	-9.73972	345
135	TA10042	Ae. geniculata		MAR071	OB 147	MAR	Essaouira; 35 km from Essaouira	31.2034	-9.70642	295
136	TA10043	Ae. geniculata		MAR071	OB 148	MAR	Essaouira; 21 km from (Zaouia) Akermoud	31.575	-9.67071	150
137	TA10044	Ae. geniculata		MAR071	OB 149	MAR	Regueragua
138	TA10437	Ae. geniculata		IND202	3547	XKX	Unknown
139	TA10847	Ae. geniculata		USA029	PI 374324	SRB	Macedonia; Strumica; prema Berovu	41.4333	22.65	227
140	TA10848	Ae. geniculata		USA029	PI 483009	CYP	Larnaca; 2 km N-NW from Ormidhia	34.9833	33.7667	30
141	TA10849	Ae. geniculata		USA029	PI 524953	ITA	Sicily; Left of main road from Canale	38.55	14.5833	120
142	TA10850	Ae. geniculata		USA029	PI 614625	UKR	Crimea (Krym); Baydar Valley near Peredove	44.5117	33.8347	420
143	TA11027	Ae. geniculata		USA288	P103	XKX	University of Missouri; Columbia
144	TA11028	Ae. geniculata	var. globulosa	USA288	P104	XKX	University of Missouri; Columbia
145	TA11109	Ae. geniculata		USA1004	18IT-003-2	ITA	Lecce; Near lighthouse at Punta Palascia [Capo d'Otranto]	40.1075	18.5199	13
1	TA1750	Ae. kotschyi		USA109	G488	IRN	Khuzestan (Khuzistan); Abe-e-Gonji; halfway between Ahvaz (Ahwaz) and Shushtar	31.6884	48.8947	36
2	TA1974	Ae. kotschyi		CAN015	RL 5143	CAN	University of Manitoba; Winnipeg
3	TA1977	Ae. kotschyi		USA109	G608	ISR	HaNegev (Southern (HaDarom)); 15 km N of Beer Sheva	31.3847	34.7916	255
4	TA1978	Ae. kotschyi		USA109	G813	ISR	Tel Aviv; Botanical Garden; Tel Aviv	32.1138	34.8088	30
5	TA1979	Ae. kotschyi		USA109	G1319	ISR	HaNegev (Southern (HaDarom)); 25 km S of Beer Sheva	31.03	34.8734	435
6	TA1980	Ae. kotschyi		USA109	G1320	ISR	HaNegev (Southern (HaDarom)); 14 km NW of Beer Sheva	31.3325	34.6989	190
7	TA1981-1	Ae. kotschyi	var. palaestina	JPN001	KU 14-1	EGY	Shamal Sina [North Saini Governate]; El'Arish (Al Arish); Sinai Penninsula	31.1321	33.8033	50
8	TA1981-2	Ae. kotschyi	var. palaestina	USA109	G956	EGY	Shamal Sina [North Saini Governate]; El'Arish (Al Arish); Sinai Penninsula	31.1321	33.8033	50
9	TA1982	Ae. kotschyi	var. palaestina	JPN001	KU 14-3	EGY	Shamal Sina [North Saini Governate]; El'Arish (Al Arish); Sinai Penninsula	31.1321	33.8033	50
10	TA1983	Ae. kotschyi	var. palaestina	JPN001	KU-6609	EGY	Al Gharbiyah; 69 km N of rest house (Cairo‚ Alexandria)	30.7253	31.0226	12
11	TA1984	Ae. kotschyi	var. palaestina	JPN001	KU-6618	EGY	Al Buhayrah; 49 km E of Alexandria (Alexandria‚ Cairo)	31.0059	30.4816	2
12	TA1985	Ae. kotschyi	var. leptostachya	JPN001	KU-6626	ISR	Jerusalem; In the garden of the Shepherd Hotel; Jerusalem	31.7946	35.2319	780
13	TA1986	Ae. kotschyi	var. palaestina	JPN001	KU-6627	ISR	Jerusalem; In the garden of the Shepherd Hotel; Jerusalem	31.7946	35.2319	780
14	TA2205	Ae. kotschyi	var. palaestina	DEU146	AE 84/91	ISR	Via Botanical Garden; University of Uppsala; Sweden
15	TA2206	Ae. kotschyi	var. hirta	DEU146	AE 738/86	AZE	Absheron/Baki; Mardakan (Mardakyan)	40.4922	50.1389	-5
16	TA2207	Ae. kotschyi		DEU146	AE 1147/94	UZB	Surxondaryo; 30 km N of Termez; Khaudaktau Hill	37.4411	67.3984	340
17	TA2274	Ae. kotschyi		SYR002	IG 46606	JOR	Al Balqa' (Balqa'a); As Sarrouk; on Suweileh (Suwaylih)‚ AS-Salt road 8 km S of Deir Abu Said at Kufr Aean [8 km after junction]	32.45	35.8	900
18	TA2665	Ae. kotschyi		USA628		JOR	Amman; Al Jiza; 11 km S of junction Amman‚ the Desert Road to Aqaba	31.7	35.9667	1000
19	TA2667	Ae. kotschyi		USA628	CN 400151	JOR	Ma'an; 11 km after junction to Ma'an from Petra; Dilagha	30.1667	35.5	1600
20	TA2679	Ae. kotschyi		USA628	CN 400150	JOR	Ma'an; 6 km from junction to Petra from Ma'an	30.1667	35.5667	1300
21	TA10550	Ae. kotschyi		ISR005	TKK03	ISR	HaNegev (Southern (HaDarom)); Har (Mount) Kanna'im (Kenaim); eastern Negev	31.3022	35.2939	375
22	TA10551	Ae. kotschyi		ISR005	TKK39	ISR	HaNegev (Southern (HaDarom)); Central Negev
23	TA10851	Ae. kotschyi		USA029	PI 227290	IRN	Hormozgan; 25 miles NE of Ahwaz	31.5667	48.8833	27
24	TA11092	Ae. kotschyi		USA029	PI 226615	IRN	Khuzestan (Khuzistan); 50 mi N of Ahwaz	31.8667	48.3667	37
25	TA11093	Ae. kotschyi		USA029	PI 227435	IRN	Takht-e-Jamshid	29.95	52.8667	1678
26	TA11094	Ae. kotschyi		USA029	PI 487276	JOR	Irbid; Qalaat Al Rabadh; 10 km W of Ajlun castle on hill top	32.3333	35.7667	1000
27	TA11095	Ae. kotschyi		USA029	PI 614627	UKR	Krym (Crimea); Sevastopol; Along road to Sevastopol	44.5156	33.5567	260
28	TA11096	Ae. kotschyi		USA029	PI 614629	UKR	Krym (Crimea); Along trail in Karadag Nature Reserve between Koktebel' and Kurortnoe and S of road A-294	44.9214	35.2319	280
1	TA1737	Ae. neglecta		USA628	84TK154-039	TUR	Izmir; Agean Agricultural Research Institute Gene Bank; Menemen
2	TA1794	Ae. neglecta		USA109	G2297	IRQ	Arbil (Irbil); 4 km NE of Shaqlawah	36.4167	44.3667	1000
3	TA1853	Ae. neglecta		USA628	84TK056-142	TUR	Hatay (Antakya); 10 km SW of Ant√¢kya	36.1473	36.0592	180
4	TA1860	Ae. neglecta		USA628	84TK132-004	TUR	Sanliurfa; 3 km SE of junction of Karacadag Mt. road and the Diyarbakir highway	37.8092	39.663	1350
5	TA1861	Ae. neglecta		USA109	G621	TUR	Kocaeli (Izmit); 11 km W of Izmit (Kocaeli)	40.7597	29.8293	55
6	TA1863	Ae. neglecta		USA109	G623	TUR	Bursa; Bursa‚ Balikesir road	40.2187	28.6111	35
7	TA1864	Ae. neglecta	var. neglecta	USA109	G1046	TUR	Gaziantep; 137 km E of Adana	37.1849	36.7136	1100
8	TA1865	Ae. neglecta		USA628	84TK154-036	TUR	Izmir; Agean Agricultural Research Institute gene bank; Menemen
9	TA1866	Ae. neglecta		USA628	84TK220-002	TUR	Canakkale; 24 km SE of Yenice	39.8159	27.3601	190
10	TA1867	Ae. neglecta		USA109	G1085	TUR	Siirt; 16 km E of Silvan	38.1286	41.174	760
11	TA1868	Ae. neglecta	var. recta	USA109	G951	JPN	Laboratory of Genetics; Kyoto University
12	TA1869	Ae. neglecta	var. neglecta	USA109	G952	JPN	Laboratory of Genetics; Kyoto University
13	TA1870	Ae. neglecta		USA628	84TK221-001	TUR	Balikesir; 17 km NW of Balya	39.6667	27.6833	450
14	TA1871	Ae. neglecta		USA628	84TK221-002	TUR	Balikesir; 17 km NW of Balya	39.6667	27.6833	450
15	TA1872-1	Ae. neglecta	var. recta	USA109	G738	XKX	Unknown
16	TA1872-2	Ae. neglecta	var. recta	USA288	P99	USA	University of Missouri; Columbia
17	TA1961	Ae. neglecta	var. neglecta	USA109	G493	IRQ	Dahuk; 88 km N of Mosul (Al Mawsil)	36.985	42.6462	525
18	TA2151	Ae. neglecta		USA628	84TK221-003	TUR	Balikesir; 17 km NW of Balya	39.6667	27.6833	450
19	TA2152	Ae. neglecta		USA628	84TK228-007	TUR	Balikesir; 3 km E of Erdek	40.4015	27.8308	15
20	TA2153	Ae. neglecta		USA628	84TK236-005	TUR	Bursa; 1 km S of Gemlik	40.4213	29.1502	60
21	TA2154	Ae. neglecta		USA628	84TK243-004	TUR	Kocaeli (Izmit); 19 km NW of Iznik (N side of Lake Iznik)	40.4887	29.501	150
22	TA2155	Ae. neglecta		USA628	84TK259-002	TUR	Bilecik; 19 km S of Sogut	39.8908	30.2426	750
23	TA2156	Ae. neglecta		USA628	84TK347-004	TUR	Konya; 32 km W of Konya	37.8754	32.0856	1450
24	TA2157	Ae. neglecta		USA628	84TK372-006	TUR	Izmir; Menemen; south slope	38.6069	27.0974	45
25	TA2159	Ae. neglecta		USA628	84TK207-006	TUR	Balikesir; 6 km SE of Edremit	39.6432	27.0387	20
26	TA2160	Ae. neglecta		USA628	84TK085-001	TUR	Diyarbakir; Diyarbakir Regional Agricultural Research Station	37.9442	40.2045	820
27	TA2161	Ae. neglecta	var. recta	USA628	84TK094-002	TUR	Diyarbakir; 18 km NE of Diyarbakir	37.988	40.3679	800
28	TA2162	Ae. neglecta		USA628	84TK095-003	TUR	Diyarbakir; Junction of the Diyarbakir‚ Highway 380	38.0427	40.5341	900
29	TA2163	Ae. neglecta	var. neglecta	USA628	84TK096-014	TUR	Diyarbakir; 19 km SE of the Diyarbakir	37.8895	40.6432	825
30	TA2164	Ae. neglecta		USA628	84TK099-026	TUR	Diyarbakir; 12 km N of the Dyarbakir	38.1167	40.4359	925
31	TA2175	Ae. neglecta		USA628	84TK362-003	TUR	Burdur; 3 km S of Aglasun	37.6107	30.5138	1000
32	TA2208	Ae. neglecta	var. neglecta	USA628	84TK104-050	TUR	Diyarbakir; 4 km NE of Dicle	38.3833	40.0833	925
33	TA2257	Ae. neglecta		USA628	84TK109-076	TUR	Diyarbakir; 25 km SW of Diyarbakir	37.75	40.1	1000
34	TA2258	Ae. neglecta		USA628	84TK109-084	TUR	Diyarbakir; 25 km SW of Diyarbakir	37.75	40.1	1000
35	TA2259	Ae. neglecta	var. recta	USA628	84TK154-013	TUR	Izmir; Agean Agricultural Research Institute gene bank; Menemen
36	TA2260	Ae. neglecta	var. neglecta	USA628	84TK154-016	TUR	Izmir; Agean Agricultural Research Institute gene bank; Menemen
37	TA2261-1	Ae. neglecta	var. neglecta	USA628	84TK154-017	TUR	Izmir; Agean Agricultural Research Institute gene bank; Menemen
38	TA2261-2	Ae. neglecta	var. neglecta	USA628	84TK154-017	TUR	Izmir; Agean Agricultural Research Institute gene bank; Menemen
39	TA2262	Ae. neglecta	var. neglecta	USA628	84TK158-032	TUR	Denizli; 6 km S of the Buldan	37.9167	28.9333	275
40	TA2263	Ae. neglecta		USA628	84TK202-004	TUR	Izmir; 22 km SE of Bergmana	39.0833	27.4167	30
41	TA2264	Ae. neglecta		USA628	84TK208-005	TUR	Canakkale; 22 km SE of Ayvacik	39.548	26.5958	50
42	TA2265	Ae. neglecta		USA628	84TK209-002	TUR	Canakkale; 9 km SE of Ayvacik	39.5833	26.4833	420
43	TA2267	Ae. neglecta		USA628	84TK048-122.0	TUR	Adana; 8 km E of Adana; 200 m W of fuel storage tanks on highway E5	37.0283	35.4158	80
44	TA2268	Ae. neglecta		USA628	84TK051-128	TUR	Hatay (Antakya); 12 km N of Dortyol; a small village a few km from the sea	36.8357	36.2251	70
45	TA2269	Ae. neglecta		USA628	84TK058-150.0	TUR	Hatay (Antakya); 13 km S of the village of Samandag (Samandaga)	36.0347	35.9809	175
46	TA2326	Ae. neglecta		USA109	G2361	IRQ	Arbil (Irbil); 13 km W of Shaqlawah	36.3992	44.2131	1000
47	TA2341	Ae. neglecta		USA109	G1091	TUR	Bitlis; 155 km NE of Diyarbakir	38.2252	41.8799	700
48	TA2671	Ae. neglecta		USA628	84TK154-038	TUR	Izmir; Agean Agricultural Research Institute gene bank; Menemen
49	TA2673	Ae. neglecta		USA628	84TK035-091.0	TUR	Antalya; 9 km NE of junction with Highway 400 to Akseki; along coastal road Antalya-Akseki	36.7576	31.517	150
50	TA2674	Ae. neglecta		USA628	84TK036-093	TUR	Antalya; 18 km E of Serik at junction with road to Tasgil	36.8997	31.2094	50
51	TA2675	Ae. neglecta	var. neglecta	USA628	84TK030-083.01	TUR	Antalya; 30 km NW to Antalya from Korkuteli	37.0344	30.4088	500
52	TA2676	Ae. neglecta		USA628	84TK031-085.0	TUR	Antalya; Roman ruins at Perge	36.9599	30.8541	10
53	TA2677	Ae. neglecta	var. recta	USA628	84TK033-088.01	TUR	Antalya; 1 km S of Manavgat on roadside of a side junction off Highway 400	36.7695	31.444	10
54	TA2678	Ae. neglecta		USA628	84TK034-090.0	TUR	Antalya; 5 km NE of the Antalya‚AiAkseki road junction toward Akseki	36.8302	31.7889	10
55	TA2697	Ae. neglecta	var. recta	USA628	LF91-97	XKX	Unknown
56	TA2789	Ae. neglecta	var. recta	USA628	85YG011-002	HRV	Dalmacija; At junction of Highway 2 and the road to Peljesac Island on the Adriatic coast	42.8327	17.7484	50
57	TA2790	Ae. neglecta	var. neglecta	USA628	85YG005-005	BIH	Herzegovina; 2 km E of Mostar on Highway 17	43.3347	17.8209	70
58	TA2791	Ae. neglecta	var. neglecta	USA628	85YG006-016	BIH	Herzegovina; 1 km E of Mostar	43.3348	17.8111	70
59	TA2792	Ae. neglecta	var. recta	USA628	85YG007-005	HRV	Dalmacija; 10 km NE of Trsteno; rugged area along secondary road off Highway 2	42.7268	17.9925	20‚Äì50
60	TA2793	Ae. neglecta	var. recta	USA628	85YG008-005	HRV	Dalmacija; 10 km stretch on main highway just N of Dubrovnik	42.6814	18.056	50
61	TA2794	Ae. neglecta	var. recta	USA628	85YG008-013	HRV	Dalmacija; 10 km stretch on main highway just N of Dubrovnik	42.6814	18.056	50
62	TA2795	Ae. neglecta	var. recta	USA628	85YG011-009	HRV	Dalmacija; At junction of Highway 2 and the road to Peljesac Island on the Adriatic coast	42.8327	17.7484	50
63	TA2796	Ae. neglecta	var. recta	USA628	85YG013-001	XKX	Former Yugoslavia; Unknown
64	TA2797	Ae. neglecta	var. recta	USA628	85YG014-006	XKX	Former Yugoslavia; Unknown
65	TA10061	Ae. neglecta	var. neglecta	DEU146	AE 549	GRC	Botanical Garden; University of Athens
66	TA10062	Ae. neglecta	var. recta	DEU146	AE 586	ESP	Castilla y Leon; Piedralaves - S. Martin de Viera, Avila; 8 km from Arenas de San Pedro; Monbeltran Calle; Avila [along road from Piedralaves to San Martin de Viera]	40.1865	-4.98436	400
67	TA10063	Ae. neglecta	var. recta	DEU146	AE 605	ITA	Lazio; Albano Laziale; Loc. Selvotta	41.7314	12.6658	470
68	TA10064	Ae. neglecta	var. recta	DEU146	AE 608	GRC	Ionian Islands; Kefalonia Island	38.25	20.5831	70
69	TA10065	Ae. neglecta	var. neglecta	DEU146	AE 658	UKR	Crimea (Krym); Crimea	44.5161	34.151	90
70	TA10066	Ae. neglecta	var. recta	DEU146	AE 701	FRA	Rhone Alpes; Saint-Paul-le-Jeune	44.3402	4.15403	260
71	TA10067	Ae. neglecta	var. recta	DEU146	AE 913	FRA	Languedoc-Roussillon; Octon; Herault	43.6548	3.30309	200
72	TA10068	Ae. neglecta	var. neglecta	DEU146	AE 1018	BGR	Unknown
73	TA10854	Ae. neglecta		USA029	PI 374317	MNE	Bar; Gorgni Brceli	42.2417	19.0117	749
74	TA11000	Ae. neglecta		USA1004	12GE-002-4	GEO	Kvemo Kartli; Hillside N of Lake Kumisi	41.5971	44.8402	493
75	TA11001	Ae. neglecta		USA1004	12GE-002-5	GEO	Kvemo Kartli; Hillside N of Lake Kumisi	41.5971	44.8402	493
76	TA11003	Ae. neglecta		USA1004	12AZ-008-8	AZE	Daghlig Shirvan [Agsu]; 15 km W of Agsu [Aghsu]	40.6254	48.2489	334
77	TA11004	Ae. neglecta		USA1004	12AZ-008-10B	AZE	Daghlig Shirvan [Agsu]; 15 km W of Agsu [Aghsu]	40.6254	48.2491	334
78	TA11005	Ae. neglecta		USA1004	12AZ-008-11D	AZE	Daghlig Shirvan [Agsu]; 15 km W of Agsu [Aghsu]	40.6253	48.2494	328
79	TA11006	Ae. neglecta		USA1004	12AZ-008-12	AZE	Daghlig Shirvan [Agsu]; 15 km W of Agsu [Aghsu]	40.6253	48.2494	328
80	TA11084	Ae. neglecta		RUS001	VIR 1588	AFG	Unknown
1	TA1885	Ae. peregrina	var. cylindrostachys	USA109	G634	ISR	Central (Hamerkaz); 10 km E of Rehovot	31.8939	34.9242	100
2	TA1886	Ae. peregrina	var. peregrina	USA109	G3023	SYR	Al Qunaytirah; 5 km S of Al Qunaytirah (Kunetra)	33.0956	35.801	955
3	TA1887	Ae. peregrina	var. peregrina	USA109	G636	ISR	Southern (HaDarom); 4 km E of Ashqelon	31.6604	34.6378	58
4	TA1888	Ae. peregrina	var. peregrina	USA109	G637	ISR	Jerusalem; Campus of Jerusalem University	31.7711	35.2274	756
5	TA1889	Ae. peregrina	var. brachyathera	USA109	G1311	ISR	Central (Hamerkaz); 3 km SE of Rehovot	31.8627	34.8222	60
6	TA1890	Ae. peregrina	var. peregrina	USA109	G1312	ISR	Central (Hamerkaz); 3 km SE of Rehovot	31.8627	34.8222	60
7	TA1891	Ae. peregrina		USA109	G1313	ISR	Central (Hamerkaz); 3 km SE of Rehovot	31.8627	34.8222	60
8	TA1892	Ae. peregrina		CAN015	RL 5017	CAN	University of Manitoba; Winnipeg
9	TA1893	Ae. peregrina		USA109	G1026	TUR	Konya; Opposite Eregli	37.5315	34.0466	1250
10	TA1894	Ae. peregrina	var. brachyathera	JPN001	KU-6668	JOR	Al Balqa (Balqa); Basin of the Jordan River (A) (Amman‚ Dead Sea)	31.8717	35.5806	305
11	TA1895	Ae. peregrina	var. elongata	JPN001	KU-6701	JOR	Al Balqa (Balqa); Basin of the Jordan River (B) (Amman‚ Dead Sea)	31.8717	35.5806	305
12	TA1896	Ae. peregrina	var. peregrina	USA109	G666	GBR	Department of Agricultural Botany; University of Reading
13	TA1897	Ae. peregrina	var. peregrina	USA628	84TK483-001	TUR	Bitlis; 21 km E of Tatvan	38.4686	42.458	1575
14	TA1898	Ae. peregrina	var. peregrina	USA109	G955	LBN	Ash Shamal (North Lebanon); Suburbs of Tripoli (Tarabulus)	34.4381	35.8308	20
15	TA1899	Ae. peregrina		USA628	84TK054-134.01	TUR	Hatay (Antakya); 4 km SE of Iskenderum (Alexandretta)	36.5405	36.1526	250
16	TA1901	Ae. peregrina	var. typica	JPN001	JPN001:KU-13-2	ISR	Tel Aviv; Suburbs of Tel-Aviv	32.0474	34.7704	25
17	TA1902	Ae. peregrina	var. peregrina	JPN001	JPN001:KU-13-4	ISR	Palestine; West Bank [Al-Quds]; 7 km S of Jerusalem (Jerusalem)	31.7258	35.1954	80
18	TA1903	Ae. peregrina	var. intermedia	JPN001	JPN001:KU-6664	ISR	Palestine; West Bank [Nabulus]; 9 km NW of Fariah al Jiftliq (Dead Sea‚ (Jiftlik))	32.1447	35.496	-225
19	TA1904	Ae. peregrina		USA288	P83-9.2-1	USA	Missouri; University of Missouri Columbia
20	TA1918	Ae. peregrina	var. peregrina	USA628	84TK057-146.0	TUR	Hatay (Antakya); 4 km SW of the village of Samandaga	36.0824	35.9466	5
21	TA1919	Ae. peregrina	var. peregrina	USA109	G1310	ISR	Central (Hamerkaz); 3 km SE of Rehovot	31.8627	34.8222	60
22	TA1920	Ae. peregrina	var. brachyathera	USA628	84TK057-148.0	TUR	Hatay (Antakya); 4 km SW of the village of Samandaga	36.0824	35.9466	5
23	TA2173	Ae. peregrina	var. cylindrostachys	USA628	M89-78	ISR	Central (Hamerkaz); Unknown
24	TA2618	Ae. peregrina		USA628	84TK154-023	TUR	Izmir; Agean Agricultural Research Institute gene bank; Menemen			30
25	TA2681	Ae. peregrina		USA628	CN 400111	JOR	Irbid; 8 km S of Deir Abu Said at Kufr Awan	32.4333	35.75	500
26	TA2682	Ae. peregrina		USA628	CN 400139	SYR	ICARDA; possibly from Portugal
27	TA2698	Ae. peregrina		USA359	3	ISR	Northern (Hagalil); Lebanese border road	33.095	35.2496	615
28	TA2775	Ae. peregrina		USA359	8267-20	ISR	Northern (Hagalil); Lebanese border road	33.095	35.2496	615
29	TA2899-2	Ae. peregrina		USA359	8551	ISR	Unknown
30	TA10855	Ae. peregrina		USA029	PI 483019	CYP	Larnaca; 5 km WNW of Kiti	34.8333	33.6167	1
31	TA11035	Ae. peregrina		USA288	P599	XKX	University of Missouri; Columbia
32	TA11036	Ae. peregrina		USA288	W4069	XKX	University of Missouri; Columbia
33	TA11085	Ae. peregrina		MAR071	OB 91	MAR	Khenitra; Boumia	32.7167	-5.1	1510
1	TA1719	Ae. triuncialis	var. triuncialis	USA109	G392	TUR	Izmir; Bergama	39.1169	27.1839	59
2	TA1722	Ae. triuncialis	var. triuncialis	USA109	G432	TUR	Elazig; N of Elazig	38.7112	39.2136	1256
3	TA1723	Ae. triuncialis	var. triuncialis	USA109	G625	TUR	Bursa; 20 km S of Yalova	40.5232	29.315	185
4	TA1724	Ae. triuncialis	var. triuncialis	USA628	84TK036-097	TUR	Antalya; 18 km E of Serik at junction of road to Tasgil	36.8997	31.2094	50
5	TA1725	Ae. triuncialis	var. triuncialis	USA628	84TK063-007	TUR	Hatay (Antakya); 19 km N of Kirikhan in route to Hassa	36.6538	36.4544	225
6	TA1726	Ae. triuncialis	var. triuncialis	USA628	84TK091-001	TUR	Sanliurfa; 38 km SW of Diyarbakir	37.8927	39.8145	1100
7	TA1727	Ae. triuncialis	var. triuncialis	USA628	84TK121-009	TUR	Sanliurfa; 18 km SE of Bozova	37.2683	38.7651	725
8	TA1728	Ae. triuncialis	var. triuncialis	USA628	84TK125-022	TUR	Sanliurfa; 20 km W of Viransehir	37.2167	39.55	550
9	TA1729	Ae. triuncialis	var. triuncialis	USA109	G1057	TUR	Gaziantep; 28 km E of Gaziantep	37.0354	37.7106	650
10	TA1730	Ae. triuncialis	var. triuncialis	USA628	84TK132-003	TUR	Sanliurfa; 3 km SE of junction of Karacadag Mountain road and the Diyarbakir highway	37.8092	39.663	1350
11	TA1731	Ae. triuncialis	var. triuncialis	USA109	G1059	TUR	Sanliurfa; 8 km W of Urfa	37.1455	38.7254	750
12	TA1732	Ae. triuncialis	var. triuncialis	USA109	G1061	TUR	Sanliurfa; 11 km N of Urfa	37.262	38.792	700
13	TA1733	Ae. triuncialis	var. triuncialis	USA109	G1067	TUR	Sanliurfa; 69 km NE of Urfa	37.6599	39.2184	620
14	TA1734	Ae. triuncialis	var. triuncialis	USA628	84TK145-002	TUR	Gaziantep; 17 km NW of Gaziantep	37.2074	37.2917	850
15	TA1735	Ae. triuncialis	var. triuncialis	USA628	84TK534-006	TUR	Hakkari; 34 km NE of Hakkari	37.7229	44.0758	1500
16	TA1736	Ae. triuncialis	var. triuncialis	USA109	G1078	TUR	Diyarbakir; 31 km NE of Diyarbakir	38.0427	40.5306	780
17	TA1738	Ae. triuncialis	var. triuncialis	USA628	84TK201-006	TUR	Izmir; 0.5 km E of Aliaga; E edge of village	38.7938	26.9892	60
18	TA1739	Ae. triuncialis	var. triuncialis	USA628	84TK204-001	TUR	Izmir; 12 km NW of Dikili junction	39.0661	27.0003	20
19	TA1740	Ae. triuncialis	var. triuncialis	USA628	84TK218-002	TUR	Canakkale; 5 km NW of Can	40.0155	26.992	50
20	TA1741	Ae. triuncialis	var. triuncialis	USA628	84TK223-008	TUR	Balikesir; 18 km SE of Balya	39.6667	27.6833	200
21	TA1742	Ae. triuncialis	var. triuncialis	USA628	84TK242-004	TUR	Istanbul; 15 km W of Cinarcik	40.6207	28.9565	75
22	TA1743	Ae. triuncialis	var. triuncialis	USA628	84TK250-005	TUR	Eskisehir; At Eskisehir Research Station (research material)	39.7927	30.4898	785
23	TA1744	Ae. triuncialis	var. triuncialis	USA628	84TK276-001	TUR	Sakarya (Adapazari); 8 km E of Hendek	40.8268	30.8304	290
24	TA1745	Ae. triuncialis	var. triuncialis	USA109	G481	AFG	Kondoz; Between Baghlan and Kunduz	36.7	68.9	518
25	TA1746	Ae. triuncialis	var. persica	USA109	G482	AFG	Kondoz; Between Kunduz and Mazar-i-Sharif	36.7	68.3	458
26	TA1747	Ae. triuncialis	var. triuncialis	USA628	84TK308-002	TUR	Cankiri; 9 km NE of junction to Istanbul on Highway 40 to Tosya	40.8065	32.2476	840
27	TA1748	Ae. triuncialis	var. persica	USA109	G484	AFG	Faryab; 20 mi SW of Maimana (Meymaneh)	35.8523	64.6216	900
28	TA1749	Ae. triuncialis	var. triuncialis	USA109	G485	AFG	Herat; Herat	34.3333	62.1667	976
29	TA1751	Ae. triuncialis	var. triuncialis	USA109	G489	IRN	Fars; Mountain pass above Dasht Arjan (desert)	29.7167	51.7833	2135
30	TA1752	Ae. triuncialis	var. triuncialis	USA109	G490	IRN	Azarbayjan-e Khavari (East Azerbaijan); 49 km NW of Tabriz	38.3333	45.9	1563
31	TA1753	Ae. triuncialis	var. triuncialis	USA628	84TK314-002	TUR	Sinop; 6 km S of Boyabat at Samsum‚ Boyabat junction	41.4623	34.7875	400
32	TA1754	Ae. triuncialis	var. triuncialis	USA109	G486	IRN	Khuzestan (Khuzistan); Abe-e-Gonji; halfway between Ahvaz (Ahwaz) and Shushtar	31.6884	48.8947	36
33	TA1755	Ae. triuncialis	var. persica	USA109	G487	IRN	Fars; Near Kazerun	29.6167	51.6333	915
34	TA1756	Ae. triuncialis	var. triuncialis	USA109	G624	IRN	Lorestan (Luristan); Between Khorramabad and Kermanshah (Bakhtaran)	34.0936	47.9718	1840
35	TA1757	Ae. triuncialis	var. triuncialis	USA109	G628	IRN	Hamadan; 80 km E of Kermanshah (Bakhtaran)	34.4477	47.8729	1560
36	TA1758	Ae. triuncialis	var. triuncialis	USA109	G849	UKR	Crimea (Krym); Horticultural Botanica Nikitensis; Yalta; Tauria
37	TA1760	Ae. triuncialis	var. triuncialis	USA628	84TK349-001	TUR	Konya; 27 km NE of Beysehir	37.8532	31.872	1250
38	TA1762	Ae. triuncialis	var. triuncialis	USA109	G480	IRQ	Arbil (Irbil); Salahuddin (Salahadin); fenced area	36.4	44.2	1100
39	TA1763	Ae. triuncialis	var. triuncialis	USA109	G726	IRQ	Arbil (Irbil); Rawanduz (Rawandiz/Rawanduz)	36.6119	44.5235	585
40	TA1764	Ae. triuncialis	var. triuncialis	USA109	G957	JPN	Laboratory of Genetics; Kyoto University
41	TA1765	Ae. triuncialis	var. persica	USA109	G958	JPN	Laboratory of Genetics; Kyoto University
42	TA1766	Ae. triuncialis	var. triuncialis	USA109	G815	SWE	Hortus Botanicus Berqianus; Stockholm
43	TA1767	Ae. triuncialis	var. triuncialis	USA109	G665	GBR	Department of Agricultural Botany; University of Reading
44	TA1768	Ae. triuncialis	var. triuncialis	USA109	G781	ROU	Gradina Botanica; Cluj
45	TA1769	Ae. triuncialis	var. triuncialis	USA109	G491	IRN	Bakhtaran (Kermanshahan); 20 km E of Kermanshah (Bakhtaran) in the Behistun Mountains	34.25	47.2167	1344
46	TA1915	Ae. triuncialis	var. triuncialis	USA628	84TK441-001	TUR	Malatya; 47 km N of Malatya	38.6712	38.3545	675
47	TA1973	Ae. triuncialis	var. triuncialis	USA628	84TK154-037	TUR	Izmir; Agean Agricultural Research Institute Genebank; Menemen			30
48	TA2047	Ae. triuncialis		MAR071	OB 60	MAR	Unknown
49	TA2052	Ae. triuncialis	var. triuncialis	MAR071	OB 68	MAR	Oulmes; Oulmes	33.4251	-6.00177	1180
50	TA2055	Ae. triuncialis	var. triuncialis	MAR071	OB 72	MAR	Khenifra; Aguelmous	33.1587	-5.84558	1175
51	TA2057	Ae. triuncialis	var. triuncialis	MAR071	OB 76	MAR	Khenifra; Khenifra	32.9394	-5.6675	840
52	TA2135	Ae. triuncialis	var. triuncialis	KAZ037		KAZ	South Kazakh; Boraldaitau Ridge (Boraldai-Tau)	42.9122	69.8799	835
53	TA2136	Ae. triuncialis	var. triuncialis	KAZ037		KAZ	South Kazakh; Holpak-Korgan			837
54	TA2158	Ae. triuncialis	var. triuncialis	USA628	84TK443-003.02	TUR	Elazig; 1 km E of the Arapkir	38.8473	38.6454	1000
55	TA2170	Ae. triuncialis	var. triuncialis	USA628	M88-60	SYR	Halab (Aleppo); ICARDA
56	TA2176	Ae. triuncialis	var. triuncialis	USA628	84TK073-024	TUR	Gaziantep; 4 km N of Yavuzeli	37.3667	37.5667	450
57	TA2177	Ae. triuncialis	var. triuncialis	USA628	84TK085-002	TUR	Diyarbakir; Diyarbakir Regional Agricultural Research Station	37.9442	40.2045	820
58	TA2178	Ae. triuncialis	var. triuncialis	USA628	84TK099-027	TUR	Diyarbakir; 12 km N of the Dyarbakir	38.1167	40.45	925
59	TA2179	Ae. triuncialis	var. triuncialis	USA628	84TK102-041	TUR	Diyarbakir; 8 km E of the Hani	38.034	40.5135	1000
60	TA2186	Ae. triuncialis	var. triuncialis	MAR071	OB 97	MAR	Khenifra; Mrirt	33.1667	-5.56667	1115
61	TA2190	Ae. triuncialis	var. triuncialis	MAR071	OB 101	MAR	Beni Mellal; (El) Ksiba	32.5681	-6.03083	470
62	TA2218	Ae. triuncialis	var. triuncialis	MAR071	OB 1	MAR	Rabat; 14 km E of Rabat to Meknes	34.031	-6.66252	155
63	TA2224	Ae. triuncialis	var. triuncialis	MAR071	OB 8	MAR	Meknes; Edge (sortie) of El-Hajeb toward Azrou	33.6889	-5.37231	990
64	TA2226	Ae. triuncialis	var. triuncialis	MAR071	OB 10	MAR	Meknes; 20 km S of El-Hajeb to Azrou	33.5425	-5.32013	1370
65	TA2229	Ae. triuncialis	var. triuncialis	MAR071	OB 14	MAR	Fes; 11 km from Azrou between Azrou‚ Ifrane	33.483	-5.1519	1645
66	TA2231	Ae. triuncialis	var. triuncialis	MAR071	OB 16	MAR	Fes; 12 km from Fes between Fes‚ Ifrane	33.9069	-4.98779	605
67	TA2233	Ae. triuncialis	var. triuncialis	MAR071	OB 19	MAR	Fes; Station Annasseur; Sefrou	33.8292	-4.84051	840
68	TA2236	Ae. triuncialis		MAR071	OB 22	MAR	Oujda; 9 km S of Oujda toward Jerada	34.6219	-1.9899	660
69	TA2243	Ae. triuncialis	var. triuncialis	MAR071	OB 29	MAR	Al Hoceima; 1 km past Beni Abdellah between Al Hoceima and Targuist	35.0572	-4.07091	580
70	TA2244	Ae. triuncialis	var. triuncialis	MAR071	OB 30	MAR	Al Hoceima; 1 km past Beni Abdellah (N of Ikadaben) between Al Hoceima and Targuist	35.0572	-4.07091	580
71	TA2246	Ae. triuncialis	var. triuncialis	MAR071	OB 32	MAR	Al Hoceima; 19 km N of Targist (Al Hoceima)	35.0308	-4.16554	975
72	TA2249	Ae. triuncialis	var. triuncialis	MAR071	OB 38	MAR	Tetouan; 7 km from Bab Berred (Ketama)	34.9941	-4.83913	1230
73	TA2252	Ae. triuncialis	var. triuncialis	MAR071	OB 43	MAR	Tetouan; 13 km S of Chefchaouen (Ketama)	35.0986	-5.25696	405
74	TA2254	Ae. triuncialis	var. triuncialis	MAR071	OB 45	MAR	Tetouan; 36 km S of Tetouan (Chefchaoun)	35.3599	-5.36957	485
75	TA2270	Ae. triuncialis	var. triuncialis	USA628	84TK361-002	TUR	Burdur; 7 km E of Aglasun	37.6352	30.6155	1000
76	TA2271	Ae. triuncialis	var. triuncialis	USA628	84TK363-004	TUR	Burdur; 4 km NW of Celtikci	37.5615	30.45	900
77	TA2272	Ae. triuncialis	var. triuncialis	USA628	84TK369-001	TUR	Denizli; 12 km NW of Denizli	37.8749	29.0211	300
78	TA2273	Ae. triuncialis	var. triuncialis	USA628	84TK412-003.01	TUR	Kirsehir; 7 km SE of Mucur	39.0833	34.45	1050
79	TA2275	Ae. triuncialis	var. triuncialis	USA628	84TK521-002	TUR	Hakkari; 16 km W of Hakkari	37.5647	43.5704	1900
80	TA2276	Ae. triuncialis	var. triuncialis	USA628	84TK564-001	TUR	Hakkari; 18 km SW of Semdinli	37.2311	44.4579	1125
81	TA2277	Ae. triuncialis	var. triuncialis	USA628	84TK566-008	TUR	Hakkari; 21 km SW of Semdinli	37.2101	44.4411	1125
82	TA2278	Ae. triuncialis	var. triuncialis	USA628	84TK111-092	TUR	Sanliurfa; 28 km E of Siverek	37.7167	39.5833	1050
83	TA2279	Ae. triuncialis	var. triuncialis	USA628	84TK347-001	TUR	Konya; 32 km W of Konya	37.8754	32.0856	1450
84	TA2280	Ae. triuncialis	var. triuncialis	USA628	84TK348-001	TUR	Konya; 36 km NE of Beysehir	37.9117	31.9482	1300
85	TA2281	Ae. triuncialis	var. triuncialis	USA628	84TK349-001	TUR	Konya; 27 km NE of Beysehir	37.8532	31.872	1250
86	TA2282	Ae. triuncialis	var. triuncialis	USA628	84TK350-002	TUR	Konya; 6 km SW of Beysehir	37.6542	31.6691	1150
87	TA2283	Ae. triuncialis	var. triuncialis	USA628	84TK351-003	TUR	Konya; 5 km N of Beysehir	37.7208	31.7051	1125
88	TA2284	Ae. triuncialis	var. triuncialis	USA628	84TK352-001	TUR	Konya; 18 km N of Beysehir	37.8336	31.6379	1120
89	TA2285	Ae. triuncialis	var. triuncialis	USA628	84TK353-001	TUR	Isparta; 36 km NW of Beysehir; 19 km SW of Sarkikaraagac	37.9734	31.4923	1175
90	TA2286	Ae. triuncialis	var. triuncialis	USA628	84TK354-001	TUR	Isparta; 1 km NW of Sarkikaraagac	38.0854	31.356	1150
91	TA2287	Ae. triuncialis	var. triuncialis	USA628	84TK355-001	TUR	Isparta; 21 km NW of Sarkikaraagac	38.1918	31.2231	1050
92	TA2288	Ae. triuncialis	var. triuncialis	USA628	84TK356-002	TUR	Isparta; 17 km SW of Gelendost	37.9794	30.9684	950
93	TA2289	Ae. triuncialis	var. triuncialis	USA628	84TK360-001	TUR	Burdur; 10 km SE of Isparta	37.6996	30.6498	950
94	TA2290	Ae. triuncialis	var. triuncialis	USA628	84TK362-001	TUR	Burdur; 3 km S of Aglasun	37.6107	30.5138	1000
95	TA2291	Ae. triuncialis	var. triuncialis	USA628	84TK363-002	TUR	Burdur; 4 km NW of Celtikci	37.5615	30.45	900
96	TA2292	Ae. triuncialis	var. triuncialis	USA628	84TK364-001	TUR	Burdur; 3 km SE of Burdur	37.7001	30.3181	925
97	TA2293	Ae. triuncialis	var. triuncialis	USA628	84TK365-001	TUR	Burdur; 29 km NE of Yesilova	37.5789	30.0387	1070
98	TA2294	Ae. triuncialis	var. triuncialis	USA628	84TK366.1-002	TUR	Burdur; 8 km W of Yesilova	37.5179	29.6693	1310
99	TA2295	Ae. triuncialis	var. triuncialis	USA628	84TK367-001	TUR	Denizli; 2 km S of Kizilhisar	37.5585	29.2871	1020
100	TA2296	Ae. triuncialis	var. triuncialis	USA628	84TK368-001	TUR	Denizli; 32 km S of Denizli at junction of road to Tavas	37.5725	29.0796	1230
101	TA2297	Ae. triuncialis	var. triuncialis	USA628	84TK402-002	TUR	Ankara; 1 km E of Elmadag	39.9165	33.2469	1000
102	TA2298	Ae. triuncialis	var. triuncialis	USA628	84TK405-001	TUR	Kirikkale; 1 km NW of Keskin	39.6792	33.5981	1075
103	TA2299	Ae. triuncialis	var. triuncialis	USA628	84TK406-003	TUR	Kirsehir; 10 km SE of Ankara at the Kirsehir province border	39.4616	33.6223	825
104	TA2300	Ae. triuncialis	var. triuncialis	USA109	G1090	TUR	Bitlis; 155 km NE of Diyarbakir	38.2252	41.8799	700
105	TA2301	Ae. triuncialis	var. triuncialis	USA109	G1094	TUR	Mus; 229 km NE of Diyarbakir	38.5804	42.3743	1350
106	TA2302	Ae. triuncialis	var. triuncialis	USA109	G1105	TUR	Bitlis; 15 km from Bitlis to Hizan	38.3363	42.1628	1450
107	TA2303	Ae. triuncialis	var. triuncialis	USA109	G1106	TUR	Bitlis; 26 km from Bitlis to Hizan	38.2956	38.2956	1450
108	TA2304	Ae. triuncialis	var. triuncialis	USA109	G1114	TUR	Bitlis; 47 km NE of Tatvan	38.7675	42.5624	1650
109	TA2305	Ae. triuncialis	var. triuncialis	USA109	G1118	TUR	Bitlis; 59 km NE of Tatvan	38.7862	42.6922	1560
110	TA2306	Ae. triuncialis	var. triuncialis	USA109	G1183	TUR	Malatya; 55 km W of Malatya	38.3503	37.6831	1700
111	TA2307	Ae. triuncialis	var. triuncialis	USA109	G1188	TUR	Kirsehir; 16 km SE of Kirsehir	39.0709	34.3158	1120
112	TA2308	Ae. triuncialis	var. triuncialis	USA109	G1191	TUR	Kirsehir; 4 km NW of Kirsehir	39.1583	34.1228	1020
113	TA2309	Ae. triuncialis	var. triuncialis	USA109	G1196	TUR	Kirikkale; 69 km NW of Kirsehir	39.5909	33.7006	960
114	TA2310	Ae. triuncialis	var. triuncialis	USA109	G1202	TUR	Ankara; 127 km NW of Kirsehir	39.9297	33.2144	1200
115	TA2311	Ae. triuncialis	var. triuncialis	USA109	G1203	TUR	Ankara; 127 km NW of Kirsehir	39.9297	33.2144	1200
116	TA2312	Ae. triuncialis	var. triuncialis	USA109	G1205	TUR	Ankara; 94 km N of Ankara; 1 km N of intersection of Candir Road	40.6905	32.7331	920
117	TA2313	Ae. triuncialis	var. triuncialis	USA109	G1211	TUR	Afyonkarahisar; 208 km SW of Ankara	38.8996	30.8496	980
118	TA2314	Ae. triuncialis	var. triuncialis	USA109	G1214	TUR	Afyonkarahisar; 34 km SW of Afyonkarahisar	38.6051	30.2756	1200
119	TA2315	Ae. triuncialis	var. triuncialis	USA109	G1216	TUR	Afyonkarahisar; 125 km SW of Afyonkarahisar	38.4019	30.2193	1000
120	TA2316	Ae. triuncialis	var. triuncialis	USA109	G1217	TUR	Denizli; 26 km NW of Denizli	37.9439	28.9194	150
121	TA2317	Ae. triuncialis	var. triuncialis	USA109	G1218	TUR	Denizli; 28 km NW of Denizli	37.9615	28.9078	150
122	TA2321	Ae. triuncialis	var. triuncialis	USA109	G1969	TUR	Sanliurfa; 5.9 km E of Urfa	37.1494	38.8497	660
123	TA2322	Ae. triuncialis	var. triuncialis	USA109	G1970	TUR	Sanliurfa; 5.9 km E of Urfa	37.1494	38.8497	660
124	TA2323	Ae. triuncialis	var. triuncialis	USA109	G1973	TUR	Sanliurfa; 22.1 km E of Urfa	37.1609	39.0296	760
125	TA2324	Ae. triuncialis	var. triuncialis	USA109	G2021	TUR	Sanliurfa; 62 km E of Urfa; E of Hilvan	37.6115	39.0138	650
126	TA2325	Ae. triuncialis	var. triuncialis	USA109	G2333	IRQ	Arbil (Irbil); 21 km S of Harir; between Rawanduz and Shaqlawah	36.4167	44.3667	1000
127	TA2327	Ae. triuncialis	var. triuncialis	USA109	G2362	IRQ	Arbil (Irbil); 13 km W of Shaqlawah	36.3992	44.2131	1000
128	TA2328	Ae. triuncialis	var. triuncialis	USA109	G2526	IRN	Kermanshahan; 34 km E of Kamyaran on road W of Sonqor; 97 km N of Bisotun	34.8333	47.1667	1900
129	TA2588	Ae. triuncialis	var. triuncialis	USA628	84TK412-001	TUR	Kirsehir; 7 km SE of Mucur	39.0072	34.416	1050
130	TA2589	Ae. triuncialis	var. triuncialis	USA628	84TK414-001	TUR	Nevsehir; 20 km SE of Mucur	38.9471	34.416	1175
131	TA2590	Ae. triuncialis	var. triuncialis	USA628	84TK415-001	TUR	Nevsehir; 0.5 km W of junction to Hacibektas	38.9449	34.5263	1200
132	TA2591	Ae. triuncialis	var. triuncialis	USA628	84TK419-003	TUR	Nevsehir; At Goreme Ruins	38.6583	34.8536	1100
133	TA2592	Ae. triuncialis	var. triuncialis	USA628	84TK531-002	TUR	Hakkari; 31 km SW of Hakkari on road to Uludere (by bridge over Zap river)	37.4825	43.5567	1175
134	TA2593	Ae. triuncialis	var. triuncialis	USA628	84TK533-001	TUR	Hakkari; 20 km NE of Hakkari	37.6724	43.8938	1425
135	TA2594	Ae. triuncialis	var. triuncialis	USA628	84TK559-002	TUR	Hakkari; 1 km NW of Semdinli	37.3107	44.5683	1475
136	TA2595	Ae. triuncialis	var. triuncialis	USA628	84TK561-001	TUR	Hakkari; 8 km SW of Semdinli	37.268	44.5327	1150
137	TA2596	Ae. triuncialis	var. triuncialis	USA628	84TK563-001	TUR	Hakkari; 16 km SW of Semdinli	37.2456	44.4654	1150
138	TA2597	Ae. triuncialis	var. triuncialis	USA628	84TK570-002	TUR	Van; 2 km N of Van	38.5321	43.3843	1710
139	TA2599	Ae. triuncialis	var. triuncialis	USA628	84TK577-001	TUR	Bitlis; 5 km W of Adilcevaz	38.7889	42.6987	1700
140	TA2600	Ae. triuncialis	var. triuncialis	USA628	84TK007-020	TUR	Mugla; 20 km S of Mugla	37.0442	28.3585	450
141	TA2612	Ae. triuncialis	var. triuncialis	USA628	84TK008-021	TUR	Mugla; 6 km N of Marmaris	36.9117	28.2778	290
142	TA2613	Ae. triuncialis	var. triuncialis	USA628	84TK009-022	TUR	Mugla; 4 km NE of Marmaris	36.8939	28.2761	200
143	TA2614	Ae. triuncialis	var. triuncialis	USA628	84TK010-023	TUR	Mugla; 18 km E of road junction to Marmaris and main coast Highway 400	36.7801	28.0179	25
144	TA2615	Ae. triuncialis	var. triuncialis	USA628	84TK010-026	TUR	Mugla; 18 km E of road junction to Marmaris and main coast Highway 400	36.7801	28.0179	25
145	TA2616	Ae. triuncialis	var. triuncialis	USA628	84TK015-037	TUR	Mugla; 23 km NW of Fethiye	36.7477	28.9627	190
146	TA2617	Ae. triuncialis	var. triuncialis	USA628	84TK336-004	TUR	Ankara; 9 km S of Golbasi	39.7162	32.8155	900
147	TA2619	Ae. triuncialis	var. triuncialis	USA628	84TK119-114	TUR	Sanliurfa; 29 km S of Urfa	36.9181	38.9108	325
148	TA2620	Ae. triuncialis	var. triuncialis	USA628	M88-60	SYR	Halab (Aleppo); 10 km after Azaz; road on left past canal in the Wadi Valley	36.6833	37	600
149	TA2621	Ae. triuncialis	var. triuncialis	SYR002	IG 46572	SYR	Idlib (Idleb); 6 km from Harem to Sarmada	36.2306	36.55	500
150	TA2622	Ae. triuncialis	var. triuncialis	SYR002	IG 46571	SYR	Idlib (Idleb); 20 km from Sarmada	36.2306	36.5528	540
151	TA2624	Ae. triuncialis	var. triuncialis	USA628	84TK062-002.0	TUR	Hatay (Antakya); 4 km N of Kirikhan in route to Hassa	36.5345	36.3792	120
152	TA2625	Ae. triuncialis	var. triuncialis	USA628	84TK064-009.0	TUR	Hatay (Antakya); 1 km S of village of Saparozu (3.5 km E of Hassa/Kilis road junction toward Kilis)	36.853	36.5955	400
153	TA2626	Ae. triuncialis	var. triuncialis	USA628	84TK069-024.0	TUR	Gaziantep; 13 km NE of Kilis	36.7559	37.2457	625
154	TA2680	Ae. triuncialis	var. triuncialis	USA628	CN 400151B	SYR	ICARDA
155	TA2683-1	Ae. triuncialis	var. triuncialis	USA628	CN 400114	JOR	Ajloun (Ajlun); Qalaat Al Rabadh; 10 km W of Ajlun; Castle on top of hill	32.3333	35.7667	1000
156	TA2683-2	Ae. triuncialis	var. triuncialis	USA628	CN 400114A	JOR	Ajloun (Ajlun); Qalaat Al Rabadh; 10 km W of Ajlun; Castle on top of hill	32.3333	35.7667	1000
157	TA2769	Ae. triuncialis	var. triuncialis	USA628	84TK036-097.01	TUR	Antalya; 18 km E of Serik at junction of road to Tasgil	36.8997	31.2094	50
158	TA2770	Ae. triuncialis	var. triuncialis	USA628	84TK407-002	TUR	Kirsehir; 4 km SE of village of Akpinar	39.4182	33.9859	1100
159	TA2788	Ae. triuncialis	var. triuncialis	USA628	85YG007-010	HRV	Dalmacija; 10 km NE of Trsteno; rugged area along secondary road off Highway 2	42.7268	17.9925	20‚Äì50
160	TA10001	Ae. triuncialis	var. triuncialis	MAR071	OB 103	MAR	(El) Ksiba	32.5681	-6.03083	470
161	TA10013	Ae. triuncialis	var. triuncialis	MAR071	OB 115	MAR	Azilal; Demnate	31.7333	-7	935
162	TA10016	Ae. triuncialis	var. triuncialis	MAR071	OB 119	MAR	Marrakech; Barrage (Dam) Moulay Youssef	31.6451	-7.26643	875
163	TA10017	Ae. triuncialis	var. triuncialis	MAR071	OB 120	MAR	Azilal; Ait Attab (large agricultural river valley)	32.1094	-6.70531	795
164	TA10028	Ae. triuncialis	var. triuncialis	MAR071	OB 131	MAR	Marrakech; Ourika	31.3745	-7.79058	865
165	TA10053	Ae. triuncialis	var. triuncialis	DEU146	AE 996	BGR	Unknown
166	TA10054	Ae. triuncialis	var. triuncialis	DEU146	AE 1053	ITA	Lazio; Sassello-loc, Palo; Savona	44.4931	8.54417	600
167	TA10055	Ae. triuncialis	var. triuncialis	DEU146	AE 1057	PRT	Guarda; Barca de Alva (Barca d'Alva); Beira Alta region	41.0264	-6.05889	140
168	TA10056	Ae. triuncialis	var. triuncialis	DEU146	AE 1150	GRC	Sterea Ellada (Central Greece); Athen; Stadtteil Holargos; trockener Berghang [Athens; dry hillside in Cholargos (Holargos) area]	37.9899	23.8083	280
169	TA10207	Ae. triuncialis	var. triuncialis	SYR002	IG 120719	UZB	Namangan; 154 km E of Tashkent	41.0214	70.6091	1300
170	TA10357	Ae. triuncialis	var. triuncialis	TJK020	ATRI 1	TJK	Karotegin (Rudaki); Near Dushanbe; central Tajikistan	38.5833	68.8	800
171	TA10358	Ae. triuncialis	var. triuncialis	TJK020	ATRI 2	TJK	Karotegin (Rudaki); Near Dushanbe; central Tajikistan	38.5833	68.8	800
172	TA10359	Ae. triuncialis	var. triuncialis	TJK020	ATRI 3	TJK	Karotegin (Rudaki); Near Dushanbe; central Tajikistan	38.5833	68.8	800
173	TA10360	Ae. triuncialis	var. triuncialis	TJK020	ATRI 4	TJK	Karotegin (Hissor); Hisor (Hissar) district; central Tajikistan	38.5256	68.5472	450
174	TA10361	Ae. triuncialis	var. triuncialis	TJK020	ATRI 5	TJK	Karotegin (Hissor); South Hissar (Gissar Range) Mountains; central Tajikistan	38.7021	68.3817	2150
175	TA10362	Ae. triuncialis	var. triuncialis	TJK020	ATRI 6	TJK	Karotegin (Hissor); South Hissar (Gissar Range) Mountains; central Tajikistan	38.7021	68.3817	1600
176	TA10363	Ae. triuncialis	var. triuncialis	TJK020	ATRI 7	TJK	Karotegin (Hissor); South Hissar (Gissar Range) Mountains; central Tajikistan	38.7021	68.3817	1850
177	TA10364	Ae. triuncialis	var. triuncialis	TJK020	ATRI 8	TJK	Khatlon (Sughd); Faizabad (Faizabod) district; central Tajikistan	38.5667	69.3167	1200
178	TA10365	Ae. triuncialis	var. triuncialis	TJK020	ATRI 9	TJK	Khatlon (Sughd); Faizabad (Faizabod) district; central Tajikistan	38.5667	69.3167	1200
179	TA10366	Ae. triuncialis	var. triuncialis	TJK020	ATRI 10	TJK	Khatlon (Sughd); Faizabad (Faizabod) district; central Tajikistan	38.5667	69.3167	1400
180	TA10367	Ae. triuncialis	var. triuncialis	TJK020	ATRI 11	TJK	Khatlon (Sughd); South Tajikistan	37.9114	69.097	850
181	TA10368	Ae. triuncialis	var. triuncialis	TJK020	ATRI 12	TJK	Karotegin (Tojikobod); Qarm (Gharm)	39.215745 39.215745	70.5265	1400
182	TA10369	Ae. triuncialis	var. triuncialis	TJK020	ATRI 13	KGZ	Osh; Osh	40.55	72.8	965
183	TA10370	Ae. triuncialis	var. triuncialis	TJK020	ATRI 14	TJK	Leninobad; Khujand (Khodjent/Khodzhent) district; uranium mine area; north Tajikistan	40.2833	69.6333	1300
184	TA10371	Ae. triuncialis	var. triuncialis	TJK020	ATRI 15	TJK	Leninobad; Khujand (Khodjent/Khodzhent) district; uranium mine area; north Tajikistan	40.2833	69.6333	1200
185	TA10372	Ae. triuncialis	var. triuncialis	TJK020	ATRI 16	TJK	Leninobad; Khujand (Khodjent/Khodzhent) district; uranium mine area; north Tajikistan	40.2833	69.6333	1400
186	TA10438	Ae. triuncialis	var. triuncialis	IND202	3549	XKX	Unknown
187	TA10975	Ae. triuncialis	var. triuncialis	USA1004	12GE-002-2	GEO	Kvemo Kartli; Hillside N of Lake Kumisi	41.5971	44.8402	493
188	TA10976	Ae. triuncialis	var. triuncialis	USA1004	12GE-002-3	GEO	Kvemo Kartli; Hillside N of Lake Kumisi	41.5971	44.8402	493
189	TA10977	Ae. triuncialis	var. triuncialis	USA1004	12GE-005-1	GEO	Tbilisi; Tbilisi; near Mt. Makhata	41.7114	44.8357	646
190	TA10978	Ae. triuncialis	var. triuncialis	USA1004	12AZ-006-1	AZE	Daghlig Shirvan [Agsu]; Near the Manzara Restaurant; between Samaxi [Shamakhi] and Agsu	40.5918	48.416	470
191	TA10979	Ae. triuncialis	var. triuncialis	USA1004	12AZ-007-2	AZE	Daghlig Shirvan [Agsu]; 7.3 km W of Agsu; 154 km from Baku; Samaxi [Shamakhi]‚ Aghsu	40.5862	48.4158	370
192	TA10980	Ae. triuncialis	var. triuncialis	USA1004	12AZ-008-1	AZE	Daghlig Shirvan [Agsu]; 15 km W of Agsu	40.625	48.2498	311
193	TA10981	Ae. triuncialis	var. triuncialis	USA1004	12AZ-008-4	AZE	Daghlig Shirvan [Agsu]; 15 km W of Agsu	40.625	48.2493	315
194	TA10982	Ae. triuncialis	var. triuncialis	USA1004	12AZ-008-7A	AZE	Daghlig Shirvan [Agsu]; 15 km W of Agsu	40.6252	48.249	321
195	TA10983	Ae. triuncialis	var. triuncialis	USA1004	12AZ-008-11C	AZE	Daghlig Shirvan [Agsu]; 15 km W of Agsu [Aghsu]; high ridge above rest of site 8	40.6253	48.2494	328
196	TA10984	Ae. triuncialis	var. triuncialis	USA1004	12AZ-009-2	AZE	Naxcivan; 23 km N of Naxchivan City; after the village of Jahri	39.3883	45.3958	1617
197	TA10985	Ae. triuncialis	var. triuncialis	USA1004	12AZ-013-1A	AZE	Naxcivan; In riverbed of LLizbit Darasri River	39.3888	45.3436	1404
198	TA10986	Ae. triuncialis	var. triuncialis	USA1004	12AZ-015-2	AZE	Naxcivan; Along roadside next to riverbed	39.5438	45.2602	2018
199	TA10987	Ae. triuncialis	var. triuncialis	USA1004	12AZ-016-2	AZE	Naxcivan; On the grounds of the Naxchivan Botanical Gardens	39.2141	45.4084	898
200	TA10988	Ae. triuncialis	var. triuncialis	USA1004	12AZ-016-3	AZE	Naxcivan; On the grounds of the Naxchivan Botanical Gardens	39.2141	45.4084	898
201	TA10989	Ae. triuncialis	var. triuncialis	USA1004	12AZ-016-4	AZE	Naxcivan; On the grounds of the Naxchivan Botanical Gardens	39.2141	45.4084	898
202	TA11033	Ae. triuncialis	var. triuncialis	USA288	P85	XKX	University of Missouri; Columbia
203	TA11086	Ae. triuncialis	var. triuncialis	USA109	G2361	IRQ	Erbil; 13 km W of Shaqlawah	36.3992	44.2131	1000
1	TA1820	Ae. umbellulata		USA109	G429	IRN	Fars; 20.8 km W of Shiraz	41.4314	46.6517	1830
2	TA1822	Ae. umbellulata		USA109	G629	TUR	Denizli; 10 km W of Denizli	37.7854	28.9799	690
3	TA1823	Ae. umbellulata		USA288	TU87-24-1	TUR	Mugla; 4 km E of Milas‚ Yatagan road junction	37.2883	27.8256	450
4	TA1824	Ae. umbellulata		RUS001	VIR 1588	AFG	Unknown
5	TA1825	Ae. umbellulata		USA109	G1149	TUR	Bing√∂l; 154 km SW of Erzurum	39.1215	40.8362	1200
6	TA1826	Ae. umbellulata		USA109	G1210	TUR	Eskisehir; 123 km SW of Ankara	39.296	31.4429	845
7	TA1827	Ae. umbellulata		USA109	G1220	TUR	Denizli; 28 km NW of Denizli	37.9615	28.9078	150
8	TA1828	Ae. umbellulata		USA109	G2492	IRQ	As Sulaymaniyah; 16 km E of As-Sulaimaniya to Chuwartah (Chuarta)	35.6751	45.5328	1300
9	TA1829	Ae. umbellulata		USA109	G424	IRN	Qazvin; 96.5 km NW of Tehran; on road to Quzvin (Kazwin)	36.1201	50.4108	1372
10	TA1830	Ae. umbellulata		USA109	G426	IRN	Lorestan (Luristan); 32 km N of Dezful along roadside to Khorramabad	32.6167	48.2833	366
11	TA1831	Ae. umbellulata		USA109	G427	IRN	Fars; 19.3 km E of Kazerun along road to Shiraz	29.55	51.8167	1220
12	TA1832	Ae. umbellulata		USA109	G428	IRN	Fars; Badgka; 12.8 km NE of Shiraz	29.7203	52.5867	1525
13	TA1833	Ae. umbellulata		USA109	G631	IRN	Fars; 2 km NE of Shiraz	29.6333	52.5667	1610
14	TA1834	Ae. umbellulata	var. typica	JPN001	KU-8-7	TUR	Burdur; Suburbs of Burdur	37.7229	30.2948	960
15	TA1835	Ae. umbellulata		USA109	G717	IRQ	Arbil (Irbil); 4.8 km W of Salahadin	36.4	44.1333	830
16	TA1848	Ae. umbellulata		USA288	TU87-31-2	TUR	Antalya; 35 km SW of Elmali; edge of the village of Gombe	36.5504	29.6716	1200
17	TA1849	Ae. umbellulata	var. typica	JPN001	KU-8-1	TUR	Konya; Suburbs of Pozanti (Bozanti)	37.4288	34.8785	785
18	TA1850	Ae. umbellulata	var. typica	JPN001	KU-8-5	SYR	Dimashq (Damascus); 6 km W of Qatana (Damascus‚ Mt. Hermon)	33.4317	36.018	820
19	TA1851	Ae. umbellulata		GBR247	U201001	GBR	Norfolk; Plant Science Research; John Innes Center; Norwich
20	TA1852	Ae. umbellulata		USA628	84TK030-081	TUR	Antalya; 30 km NW to Antalya from Korkuteli	37.0344	30.4088	500
21	TA1854	Ae. umbellulata		USA628	84TK116-104	TUR	Urfa; 8 km SW of Hilvan; along side road just W of a small village	37.5225	38.8919	625
22	TA1855	Ae. umbellulata		USA628	84TK140-028	TUR	Adiyaman; 20 km E of Golbasi	37.7517	37.8561	670
23	TA2137	Ae. umbellulata		USA628	84TK016-040.01	TUR	Antalya; 48 km SE of Fethiye; 2 km SE of the village of Kinik	36.3364	29.3266	200
24	TA2139	Ae. umbellulata		USA628	84TK017-042.01	TUR	Antalya; S edge of the Kalkan village limits	36.2655	29.4145	175
25	TA2165	Ae. umbellulata		USA628	84TK202-006	TUR	Izmir; 22 km SE of Bergama	39.0484	27.0943	30
26	TA2627	Ae. umbellulata		USA628	84TK144-047	TUR	Kahramanmaras; 14 km SE of Kahramanmaras (Kahraman Maras)	37.4836	37.0432	515
27	TA2628	Ae. umbellulata		USA628	84TK154-050	TUR	Izmir; Agean Agricultural Research Institute gene bank; Menemen			30
28	TA2629	Ae. umbellulata		USA628	84TK202-008	TUR	Izmir; 22 km SE of Bergama	39.0484	27.0943	30
29	TA2630	Ae. umbellulata		USA628	84TK223-010	TUR	Balikesir; 18 km SE of Balya	39.6667	27.6833	200
30	TA2631	Ae. umbellulata		USA628	84TK308-003	TUR	Cankiri; 9 km NE of junction to Istanbul on highway 40 to Toysa	40.8065	32.2476	840
31	TA2632	Ae. umbellulata		USA628	84TK344-004	TUR	Konya; 1 km W of Konya	37.8823	32.4201	1125
32	TA2633	Ae. umbellulata		SYR002	IG 46581	SYR	Halab (Aleppo); Kafr Takharim; on road to Harem near fig trees	36.1133	36.5114	300
33	TA2634	Ae. umbellulata		USA628	84TK072-012	TUR	Gaziantep; 19 km N of Gaziantep toward Yavuzeli	37.2347	37.5101	800
34	TA2635	Ae. umbellulata		USA628	84TK073-027	TUR	Gaziantep; 4 km N of Yavuzeli	37.3369	37.566	450
35	TA2636	Ae. umbellulata		USA628	84TK076-036	TUR	Gaziantep; 9 km N of Araban at the Gaziantep‚ Adiyaman province border	37.5176	37.7107	820
36	TA2637	Ae. umbellulata		USA628	84TK077-042	TUR	Adiyaman; 10 km S of Besni	37.6376	37.7765	900
37	TA2638	Ae. umbellulata		USA628	84TK159-039	TUR	Denizli; 25 km S of Sarigol; 10 km N of the Buldan junction	38.1016	28.8371	275
38	TA2639	Ae. umbellulata		USA628	84TK152-002	TUR	Izmir; Medical center in Bergama; Bergama stop 1	39.1167	27.1829	60
39	TA2640	Ae. umbellulata		USA628	84TK202-007	TUR	Izmir; 22 km SE of Bergama	39.0484	27.0943	30
40	TA2641	Ae. umbellulata		USA628	84TK207-005	TUR	Balikesir; 6 km SE of Edremit	39.6432	27.0387	20
41	TA2642	Ae. umbellulata		USA628	84TK004-013.0	TUR	Mugla; 1 km W of Karalti	37.3063	27.9911	420
42	TA2643	Ae. umbellulata		USA628	84TK010-024	TUR	Mugla; 18 km E of the junction of the road to Marmaris and main coast Highway 400	36.7801	28.0179	25
43	TA2644	Ae. umbellulata		USA628	84TK020-047	TUR	Antalya; 8 km N of the Elmali‚ Finike road junction toward Elmali	36.6654	29.9216	190
44	TA2649	Ae. umbellulata		USA628	84TK003-007.02	TUR	Mugla; 4 km E of Milas‚ Yatagan road junction	37.2883	27.8256	400
45	TA2800	Ae. umbellulata		USA628	79TK021-128.1	TUR	Diyarbakir; 10 km NE of Diyarbakir Regional Research Institute	37.961	40.3253	650
46	TA10416	Ae. umbellulata		ISR005	TU04	TUR	Gaziantep; Unknown
47	TA10835	Ae. umbellulata		AZE015	925/10	AZE	Shaki-Zaqatala (Qax); Girdmanchay (River Valley)	41.4314	46.6517	319
48	TA10998	Ae. umbellulata		USA1004	12AZ-008-10A	AZE	Daghlig Shirvan [Agsu]; 15 km W of Agsu [Aghsu]	40.6254	48.2491	334
49	TA10999	Ae. umbellulata		USA1004	12AZ-008-11A	AZE	Daghlig Shirvan [Agsu]; 15 km W of Agsu [Aghsu]	40.6253	48.2494	328
50	TA11097	Ae. umbellulata		USA029	PI 487219	SYR	Idlib (Idleb); Tall Adeh hill; on road to Qalaat Samaan	36.2514	36.7944	300
51	TA11098	Ae. umbellulata		USA029	PI 542362	TUR	Diyarbakir; 4 km NE of Dicle	38.3833	40.0833	925
52	TA11099	Ae. umbellulata		USA029	PI 542364	TUR	Diyarbakir; 25 km SW of Diyarbakir	37.75	40.1	1000
53	TA11100	Ae. umbellulata		USA029	PI 542369	TUR	Usak; 3 km E of Guney; 55 km E of Usak or 38 km W of Afyon	38.8167	29.9833	1250
54	TA11101	Ae. umbellulata		USA029	PI 542371	TUR	Izmir; Bergama stop 2; hill over looking valley with remains of Roman theatre on hillside	39.1167	27.1833	50
55	TA11102	Ae. umbellulata		USA029	PI 542372	TUR	Denizli; 500 m from junction on Pamukkale road	37.85	29.05	180
56	TA11103	Ae. umbellulata		USA029	PI 542376	TUR	Manisa; 2 km S of Sarigol	38.2	28.7167	305
57	TA11104	Ae. umbellulata		USA029	PI 554282	TUR	Kocaeli; 4 km NE of Kandira	41.0833	30.1667	50
58	TA11105	Ae. umbellulata		USA029	PI 564235	TUR	Canakkale; 9 km SE of Ayvacik	39.5833	26.4833	420
59	TA11106	Ae. umbellulata		USA029	PI 573436	TUR	Bilecik; 3 km E of the Bozuyuk-Eskisehir-Kutahya junction	39.5833	30.9333	900

## Sheet: Comopyrum_Section
B) Comopyrum_Section
S.N.	Accession ID	Species	Sub Taxa	Accession Name	Donor Number	Collection_Country	Collection Site	Latitude	Longitude	Elevation
1	TA1965	Ae. comosa	var. subventricosa	USA109	G960	TUR	Istanbul; Maltepe	40.9333	29.1333	30
2	TA1967	Ae. comosa	var. subventricosa	USA109	G603	GRC	Thessaloniki (Makedonia); 8 km N of Salonika (Thessaloniki)	39.6	20.55	135
3	TA2102	Ae. comosa	var. comosa	USA109	G601	GRC	Epidavros	37.6354	23.1537	8
4	TA2104	Ae. comosa	var. comosa	USA109	G959	GRC	Unknown
5	TA2171	Ae. comosa	var. comosa	USA628	84TK154-008	TUR	Izmir; Agean Agricultural Research Institute Gene Bank; Menemen			30
6	TA2731	Ae. comosa	var. comosa	JPN001	KU-17-4	TUR	Izmir; Suburbs of Ismir	38.389	27.2035	235
7	TA2732	Ae. comosa	var. comosa	JPN001	KU-17-5	TUR	Izmir; Suburbs of Ismir	38.389	27.2035	235
8	TA2733	Ae. comosa	var. comosa	DEU146	AE 115/91	RUS	Vavilov Institute of Research; St. Petersburg
9	TA2734	Ae. comosa	var. subventricosa	JPN001	KU-18-3	GRC	Crete (Khania); Between Hania (Khania) and Souda	35.5043	24.0381	45
10	TA2735	Ae. comosa	var. subventricosa	JPN001	KU-5801	TUR	Kocaeli; 39 km W of Izmit	40.8167	29.5	105
11	TA2736	Ae. comosa	var. subventricosa	JPN001	KU-5807	GRC	Peloponneses (Ilia); In the ruins of Olympia	37.4667	20.5	35
12	TA2737	Ae. comosa	var. subventricosa	DEU146	AE 783/87	GRC	Corfu (Kerkira); NW of Kerkira (Kepkypa/Corfu) on Isle of Kerkira; near Ptoamos River in saline habitat; NW of Corfu	39.6304	19.8863	1
13	TA2756	Ae. comosa	var. comosa	JPN001	KU-11434	GRC	Thessaly (Larissa); 11 km S of Elassona to Larissa	39.8307	22.2583	200
14	TA2757	Ae. comosa	var. comosa	JPN001	KU-11435	GRC	Thessaly (Magnissia); 52 km SE of Larissa to Volos	39.3874	22.8419	250
15	TA2758	Ae. comosa	var. comosa	JPN001	KU-12172	GRC	Sterea Ellada (Attica); Imittos (Hymettus) Mountains; E of Athens	37.963	23.8167	400
16	TA2759	Ae. comosa	var. comosa	JPN001	KU-12173	GRC	Sterea Ellada (Attica); Imittos (Hymettus) Mountains; E of Athens	37.963	23.8167	290
17	TA2760	Ae. comosa	var. comosa	JPN001	KU-12175A	GRC	Sterea Ellada (Attica); Imittos (Hymettus) Mountains; E of Athens	37.963	23.8167	210
18	TA2761	Ae. comosa	var. subventricosa	JPN001	KU-11436	GRC	Peloponneses (Lakonia); Taygetus Mts	36.9833	22.3333	1080
1	TA2180	Ae. uniaristata		USA628	M90-417	ITA	Puglia; University of Bari
2	TA2345	Ae. uniaristata	var. typica	USA109	G1439	GRC	Peloponneses (Ilia); In the ruins of Olympia	37.6381	21.6306	35
3	TA2685	Ae. uniaristata		RUS001	VIR 643	RUS	5 km S of Derbent; at Vavilov Institute of Research station	42.0651	48.2849	-10
4	TA2686	Ae. uniaristata		RUS001	VIR 650	RUS	Vavilov Institute of Research; St. Petersburg
5	TA2687	Ae. uniaristata		RUS001	VIR 667	RUS	Vavilov Institute of Research; St. Petersburg
6	TA2688	Ae. uniaristata		RUS001	VIR 1590	GRC	Peloponneses (Ilia); In the ruins of Olympia	37.6381	21.6306	35
7	TA2689	Ae. uniaristata		RUS001	VIR 2273	RUS	Vavilov Institute of Research; St. Petersburg
8	TA2693	Ae. uniaristata		USA628	84TK154-052	TUR	Izmir; Agean Agricultural Research Institute gene bank; Menemen
9	TA2694	Ae. uniaristata		USA628	LW 92-63	XKX	Unknown
10	TA2695	Ae. uniaristata		USA628	LWF 92-65	XKX	Unknown
11	TA2696	Ae. uniaristata		USA628	LW 90-100	XKX	Unknown
12	TA2739	Ae. uniaristata	var. typica	JPN001	KU-19-3	GRC	Peloponneses (Ilia); In the ruins of Olympia	37.6381	21.6306	35
13	TA2740	Ae. uniaristata		DEU146	AE 156/94	RUS	Vavilov Institute of Research; St. Petersburg
14	TA2762	Ae. uniaristata		JPN001	KU-11478	GRC	Peloponneses (Arkadia); 47 km S from Vitina to Megalopolis	37.4552	22.1031	640
15	TA2763	Ae. uniaristata		JPN001	KU-11479	GRC	Peloponneses (Arkadia);	37.3139	22.0393	640
16	TA2764	Ae. uniaristata		JPN001	KU-11480	GRC	Peloponneses (Lakonia);	36.9833	22.3333	1080
17	TA2765	Ae. uniaristata		JPN001	KU-11481	GRC	Peloponneses (Lakonia); 10 km N from Vamvakou to Karyes (Karies)	37.2783	22.5199	1030
18	TA2766	Ae. uniaristata		JPN001	KU-12177	GRC	Crete (Khania); 4.5 km SW of Omalos	35.3261	23.8666	1030
19	TA2767	Ae. uniaristata		JPN001	KU-12178	GRC	Thessaly (Ioannina); 31 km N of Ioannina	39.8668	20.6512	600
20	TA2768	Ae. uniaristata		JPN001	KU-12179	GRC	Thessaly (Ioannina); 35 km N of Ioannina	39.8823	20.631	530
21	TA10856	Ae. uniaristata		USA029	PI 554421	TUR	Eskisehir; 7 km NW of Eskisehir	39.8167	30.4333	800
22	TA11034	Ae. uniaristata		USA288	W4068	XKX	University of Missouri; Columbia

## Sheet: Cylindropyrum_Section
C) Cylindropyrum_Section
S.N.	Accession ID	Species	Sub Taxa	Accession Name	Donor Number	Collection_Country	Collection Site	Latitude	Longitude	Elevation
1	TA1843	Ae. cylindrica	var. panciaristata	USA109	G403	TUR	Igdir; Village of Harkof; near Igdir	38.9333	44.0333	2157
2	TA1844	Ae. cylindrica		USA628	84TK299-004	TUR	Cankiri; 8 km E of Cerkes	40.8167	32.9833	1000
3	TA1846	Ae. cylindrica		USA628	84TK330-006	TUR	Ankara; 5 km E of Ankara city limits sign	39.9208	32.9909	575
4	TA1847	Ae. cylindrica	var. typica	USA109	G605	TUR	Tunceli; 17 km SW of Tunceli	39.056	39.3922	1215
5	TA1856	Ae. cylindrica	var. typica	USA109	G606	IRN	Hamadan; Hamadan	34.8008	48.5149	1810
6	TA1857	Ae. cylindrica	var. typica	USA109	G660	GBR	Department of Agricultural Botany; University of Reading
7	TA1858	Ae. cylindrica		USA628	84TK368-003	TUR	Denizli; 32 km S of Denizli (Tavas junction)	37.5725	29.0796	1230
8	TA1859	Ae. cylindrica		USA628	84TK414-002	TUR	Nevsehir; 20 km SE of Mucur	39.0667	34.55	1175
9	TA2131	Ae. cylindrica		KAZ037		KAZ	Zhambyl; Karatau	43.1811	70.4589	835
10	TA2132	Ae. cylindrica		USA109	G401	TUR	Erzurum; Between Horasan and Pasinler (Hasankale)	40.0118	41.9623	1620
11	TA2133	Ae. cylindrica		KAZ037		KAZ	Shyghys Qazaqstan (East Kazahkstan); Karoi	47.9834	83.0514	680
12	TA2134	Ae. cylindrica		KAZ037		KAZ	Almaty; Almalybak	43.2171	76.6853	785
13	TA2201	Ae. cylindrica	var. pauciaristata	DEU146	AE 663/80	FRA	Hantes-Alpes; Tallard (Taliard)	44.4619	6.05533	600
14	TA2202	Ae. cylindrica	var. aristulata	DEU146	AE 889/86	ROU	Olt; Slaveni	44.083	24.533	65
15	TA2203	Ae. cylindrica		DEU146	AE 746/82	IRN	Khorasan; Fariman	35.7078	59.8537	1395
16	TA2204	Ae. cylindrica		DEU146	AE 719/81	ARM	Yerevan; Yerevan; city limits at the Obelisk of Liberty	40.1855	44.49	1065
17	TA2329	Ae. cylindrica	var. typica	USA109	G2536	IRN	Bakhtaran (Kermanshahan); 9 km NW of Kermanshah to Sar-e Pol-e Zahab	34.3763	46.9775	1400
18	TA2330	Ae. cylindrica	var. typica	USA109	G1093	TUR	Bitlis; 229 km NE of Diyarbakir	38.5804	42.3743	1350
19	TA2331	Ae. cylindrica		USA109	G1095	TUR	Bitlis; 3 km SW of Bitlis	38.3737	42.0962	1430
20	TA2332	Ae. cylindrica	var. panciaristata	USA109	G1126	TUR	Igdir; 37 km N of Dogubayazit	39.7811	44.1486	1510
21	TA2333	Ae. cylindrica		USA109	G1198	TUR	Ankara; 120 km NW of Kirsehir	39.9392	33.2721	1200
22	TA2334	Ae. cylindrica		USA109	G1199	TUR	Ankara; 120 km NW of Kirsehir	39.9392	33.2721	1200
23	TA2335	Ae. cylindrica		USA109	G1204	TUR	Ankara; 127 km NW of Kirsehir	39.9297	33.2144	1200
24	TA2336	Ae. cylindrica		USA109	G1208	TUR	Ankara; 10 km SW of Ankara	39.8022	32.5346	800
25	TA2657	Ae. cylindrica		USA628	CN 400156	SYR	Dimashq (Damascus); 17 km S of An Nabk (Nabik) from Damascus	33.8844	36.6725	1380
26	TA2799	Ae. cylindrica		USA628	84TK501-004	TUR	Van; 14 km SW Van; at sign reading 20 km to Van	38.4167	43.3	1650
27	TA10147	Ae. cylindrica		SYR002	IG 120722	KAZ	South Kazakhstan (Ongtustik Qazaqstan); 24 km N of Tashkent; towards Shymkent (Chimkent)	41.4794	69.1506	620
28	TA10148	Ae. cylindrica		SYR002	IG 120723	KAZ	South Kazakhstan (Ongtustik Qazaqstan); 73 km N of Tashkent	41.7139	69.3951	720
29	TA10149	Ae. cylindrica		SYR002	IG 120724	KAZ	South Kazakhstan (Ongtustik Qazaqstan); 82 km N of Tashkent	41.8307	69.3979	820
30	TA10150	Ae. cylindrica		SYR002	IG 120725	KAZ	South Kazakhstan (Ongtustik Qazaqstan); 169 km N of Tashkent	42.4761	69.3896	400
31	TA10151	Ae. cylindrica		SYR002	IG 120726	KAZ	South Kazakhstan (Ongtustik Qazaqstan); 245 km N of Tashkent	43.0287	69.4281	280
32	TA10152	Ae. cylindrica		SYR002	IG 120727	KAZ	South Kazakhstan (Ongtustik Qazaqstan); 424 km N of Tashkent (near Zhambyl (Shambul))	42.8931	71.3183	920
33	TA10153	Ae. cylindrica		SYR002	IG 120728	KAZ	South Kazakhstan (Ongtustik Qazaqstan); 431 km N of Tashkent (near Zhambyl (Shambul))	42.8931	71.3183	1040
34	TA10154	Ae. cylindrica		SYR002	IG 120737	KAZ	South Kazakhstan (Ongtustik Qazaqstan); 104 km N of Tashkent	42.086	69.4775	550
35	TA10181	Ae. cylindrica		SYR002	IG 120710	TKM	Balkan; Krasnovodisk airport	40.0333	52.9667	26
36	TA10201	Ae. cylindrica		SYR002	IG 120713	UZB	Jizzakh; 70 km E of Samarkand	40.0167	67.6	850
37	TA10203	Ae. cylindrica		SYR002	IG 120715	UZB	Taskent (Tashkent); 104 km E of Tashkent	40.9758	69.9774	840
38	TA10204	Ae. cylindrica		SYR002	IG 120716	UZB	Taskent (Tashkent); 126 km E of Tashkent	41.1352	70.3674	1040
39	TA10205	Ae. cylindrica		SYR002	IG 120717	UZB	Namangan; 133 km E of Tashkent	41.0835	70.5487	1150
40	TA10206	Ae. cylindrica		SYR002	IG 120718	UZB	Namangan; 140 km E of Tashkent	40.928	70.73	1240
41	TA10208	Ae. cylindrica		SYR002	IG 120720	UZB	Fergana; 196 km E of Tashkent	40.5514	70.9717	1370
42	TA10209	Ae. cylindrica		SYR002	IG 120721	UZB	Fergana; 30 km W of Kokand	40.5333	70.5833	640
43	TA10341	Ae. cylindrica		TJK020	ACYL 1	TJK	Karotegin; Hisor (Hissar) district; central Tajikistan	38.5256	68.5472	450
44	TA10342	Ae. cylindrica		TJK020	ACYL 2	TJK	Karotegin; Hisor (Hissar) district; central Tajikistan	38.5256	68.5472	450
45	TA10343	Ae. cylindrica		TJK020	ACYL 3	TJK	Khatlon (Sughd); Faizabad (Faizabod) district; central Tajikistan	38.5667	69.3167	1200
46	TA10344	Ae. cylindrica		TJK020	ACYL 4	TJK	Khatlon (Sughd); Faizabad (Faizabod) district; central Tajikistan	38.5667	69.3167	1200
47	TA10345	Ae. cylindrica		TJK020	ACYL 5	TJK	Karotegin; Tavildara district, east-central Tajikistan	38.7167	70.4667	1600
48	TA10346	Ae. cylindrica		TJK020	ACYL 6	TJK	Khatlon (Sughd); South Tajikistan	37.9114	69.097	800
49	TA10347	Ae. cylindrica		TJK020	ACYL 7	TJK	Leninobad; Istarawshan (Estaravshan) district; north Tajikistan	39.9084	69.0051	950
50	TA10348	Ae. cylindrica		TJK020	ACYL 8	TJK	Leninobad; Ghonchi (Ganchi) district; north Tajikistan	39.9667	69.1333	450
51	TA10349	Ae. cylindrica		TJK020	ACYL 9	TJK	Leninobad; Ghonchi (Ganchi) district; north Tajikistan	39.9667	69.1333	450
52	TA10350	Ae. cylindrica		TJK020	ACYL 10	TJK	Leninobad; Ghonchi (Ganchi) district; north Tajikistan	39.9667	69.1333	450
53	TA10351	Ae. cylindrica		TJK020	ACYL 11	TJK	Leninobad; Khujand (Khodjent/Khodzhent) district; north Tajikistan	40.2833	69.6333	500
54	TA10352	Ae. cylindrica		TJK020	ACYL 12	TJK	Leninobad; Khujand (Khodjent/Khodzhent) district; north Tajikistan	40.2833	69.6333	500
55	TA10353	Ae. cylindrica		TJK020	ACYL 13	UZB	Tashkent; Bekobod district; border with north Tajikistan	40.2186	69.2243	400
56	TA10354	Ae. cylindrica		TJK020	ACYL 14	TJK	Karotegin; Tursunzade (Tursunzoda) district; In the Hissar Mountains; central Tajikistan	38.5333	68.2167	1600
57	TA10355	Ae. cylindrica		TJK020	ACYL 15	KGZ	Osh; Osh	40.55	72.8	965
58	TA10356	Ae. cylindrica		TJK020	ACYL 16	KGZ	Osh; Osh	40.55	72.8	965
59	TA10842	Ae. cylindrica		USA029	PI 298891	AFG	Faryab; 20 miles S of Maimana	35.7167	64.9	915
60	TA10843	Ae. cylindrica		USA029	PI 374345	SRB	Macedonia; Prilep; Pletvar	41.3692	21.6519	995
61	TA10844	Ae. cylindrica		USA029	PI 374377	SRB	Southern and Eastern Serbia (Toplica); Prokuplje	43.2342	21.5881	277
62	TA10845	Ae. cylindrica		USA029	PI 568161	UZB	Toshkent; VIR substation at Hastrakt; 100 km NE of Tashken up the Pskim River	41.7	70.1	1200
63	TA10846	Ae. cylindrica		USA029	PI 614614	UKR	Crimea (Krym); Near Black Sea and Sanatome along road A-294	44.4044	33.825	230
64	TA10962	Ae. cylindrica		USA1004	12GE-001-1	GEO	Kvemo Kartli; 3 km W of Lake Kumisi	41.6099	44.8017	521
65	TA10963	Ae. cylindrica		USA1004	12GE-001-2	GEO	Kvemo Kartli; 3 km W of Lake Kumisi	41.6099	44.8017	521
66	TA10964	Ae. cylindrica		USA1004	12GE-004-1B	GEO	Tbilisi; Tbilisi; busy roadside corner	41.7107	44.8369	632
67	TA10965	Ae. cylindrica		USA1004	12GE-005-2B	GEO	Tbilisi; Tbilisi; near Mt. Makhata	41.7114	44.8357	646
68	TA10966	Ae. cylindrica		USA1004	12AZ-001-1	AZE	Daghlig Shirvan [Qobustan]; 90 km W of Baku	40.5001	48.9798	631
69	TA10967	Ae. cylindrica		USA1004	12AZ-002-2	AZE	Daghlig Shirvan [Qobustan]; 95 km W of Baku	40.5321	48.8973	805
70	TA10968	Ae. cylindrica		USA1004	12AZ-002-3	AZE	Daghlig Shirvan [Qobustan]; 95 km W of Baku	40.5321	48.8973	805
71	TA10969	Ae. cylindrica		USA1004	12AZ-003-2	AZE	Daghlig Shirvan [Qobustan]; 103 km W of Baku	40.5287	48.7885	691
72	TA10970	Ae. cylindrica		USA1004	12AZ-003-4	AZE	Daghlig Shirvan [Qobustan]; 103 km W of Baku	40.5295	48.7889	683
73	TA10971	Ae. cylindrica		USA1004	12AZ-005-2	AZE	Daghlig Shirvan [Samaxi]; 140 km W of Baku; W of Samaxi [Shamakhi]; 4 km from Site 4	40.6489	48.4783	790
74	TA10972	Ae. cylindrica		USA1004	12AZ-009-1	AZE	Naxcivan; 23 km N of Naxchivan City; after the village of Jahri	39.3883	45.3958	1617
75	TA10973	Ae. cylindrica		USA1004	12AZ-013-1B	AZE	Naxcivan; In riverbed of LLizbit Darasri River	39.3888	45.3436	1404
76	TA10974	Ae. cylindrica		USA1004	12AZ-016-1	AZE	Naxcivan; On the grounds of the Naxchivan Botanical Gardens	39.2141	45.4084	898
77	TA11026	Ae. cylindrica		USA288	P27	XKX	University of Missouri; Columbia
78	TA11076	Ae. cylindrica		SYR002	IG 120714	UZB	Taskent (Tashkent); 99 km E of Tashkent	40.9426	69.8895	840
1	TA1906	Ae. markgrafii		USA628	84TK123-015.03	TUR	Sanliurfa; 42 km E of Urfa	37.2106	39.2212	600
2	TA1907	Ae. markgrafii		USA628	84TK145-007	TUR	Gaziantep; 17 km NW of Gaziantep	37.2074	37.2917	850
3	TA1908-1	Ae. markgrafii			S740-69	DEU	Pflanzenzuchtung Hohenthurm
4	TA1908-2	Ae. markgrafii	var. polyathera		S740-69	DEU	Pflanzenzuchtung Hohenthurm
5	TA1908-3	Ae. markgrafii			S740-69	DEU	Pflanzenzuchtung Hohenthurm
6	TA1909	Ae. markgrafii		USA109	G979	TUR	Gaziantep; 40 km W of Gaziantep	37.1734	36.9196	690
7	TA2085	Ae. markgrafii		USA628	84TK201-008	TUR	Izmir; 0.5 km E Aliaga; E edge of village	38.7938	26.9892	60
8	TA2086	Ae. markgrafii		USA628	84TK206-004	TUR	Balikesir; 6 km N of Ayvalik	39.3659	26.7678	4
9	TA2087	Ae. markgrafii		USA628	84TK213-005	TUR	Canakkale; 7 km NE of Canakkale; in route to Lapseki	40.1773	26.4839	80
10	TA2088	Ae. markgrafii		USA628	84TK215-002	TUR	Canakkale; 3 km SW of Lapseki	40.3269	26.6563	10
11	TA2089	Ae. markgrafii		USA628	84TK254-008	TUR	Bilecik	39.8794	30.0989	800
12	TA2090	Ae. markgrafii		USA628	84TK314-005	TUR	Sinop; 6 km S of Boyabat at Samsum	41.4623	34.7875	400
13	TA2091	Ae. markgrafii		USA628	84TK348-004	TUR	Konya; 36 km NE of Beysehir	37.9117	31.9482	1300
14	TA2093	Ae. markgrafii		USA628	84TK304-003	TUR	Cankiri; 12 km S of Cankiri	40.5065	33.6271	680
15	TA2094	Ae. markgrafii		USA628	84TK354-002	TUR	Isparta; 1 km NW of Sarkikaraagac	38.1	38.1	1150
16	TA2095	Ae. markgrafii		USA628	84TK035-092.0	TUR	Antalya; 9 km NE of junction with Highway 400 to Akseki; along coastal road Antalya	36.7576	31.517	150
17	TA2096	Ae. markgrafii		USA628	84TK036-094.0	TUR	Antalya; 18 km E of Serik at junction with road to Tasgil	36.8997	31.2094	50
18	TA2192-1	Ae. markgrafii		USA288	77 TF01-19	USA	Missouri; University of Missouri; Columbia
19	TA2192-2	Ae. markgrafii		USA288	W4061	USA	Missouri; University of Missouri; Columbia
20	TA10852	Ae. markgrafii		USA029	PI 551121	GRC	Trikala; 2 km before Agios (Saint) Stephanos Monastery on road from Trikala Aghiatriada	39.7093	21.6386	450
21	TA10853	Ae. markgrafii		USA029	PI 551124	GRC	Thessaloniki; 2 km before Krini on Agios (Saint) Antonios	40.4064	23.152	220

## Sheet: Sitopsis_Section
D) Sitopsis_Section
S.N.	Accession ID	Species	Sub Taxa	Accession Name	Donor Number	Collection_Country	Collection Site	Latitude	Longitude	Elevation
1	TA1942	Ae. bicornis	var. bicornis	USA109	G1420	EGY	Marsa Matruh	31.3513	27.2296	30
2	TA1943	Ae. bicornis	var. bicornis	USA109	G1421	EGY	Marsa Matruh	31.3513	27.2296	30
3	TA1944	Ae. bicornis	var. bicornis	USA109	G1422	EGY	Al KIskandariyah; 21 km W of Alexandria	31.0365	29.7949	-1
4	TA1945	Ae. bicornis	var. bicornis	USA109	G1423	EGY	Al KIskandariyah; 21 km W of Alexandria	31.0365	29.7949	-1
5	TA1947	Ae. bicornis	var. bicornis	USA109	G1426	EGY	Al KIskandariyah; 21 km W of Alexandria	31.0365	29.7949	-1
6	TA1949	Ae. bicornis		USA109	G1298	ISR	Nirim	31.3357	34.3941	115
7	TA1950	Ae. bicornis		USA109	G1299	ISR	Gvulot	31.219	34.4736	125
8	TA1951	Ae. bicornis		USA109	G1318	ISR	Gvulot	31.2257	34.4794	125
9	TA1952	Ae. bicornis	var. bicornis	USA109	G944	JPN	Laboratory of Genetics; Kyoto University
10	TA1953	Ae. bicornis	var. bicornis	USA109	G1425	EGY	Al KIskandariyah; 21 km W of Alexandria	31.0365	29.7949	-1
11	TA1954	Ae. bicornis	var. bicornis	USA109	G1427	EGY	Al KIskandariyah; 21 km W of Alexandria	31.0365	29.7949	-1
12	TA1956	Ae. bicornis		USA109	G756	CAN	University of Manitoba; Winnipeg
13	TA11023	Ae. bicornis	var. bicornis	USA288	P101	XKX	University of Missouri; Columbia
1	TA1910	Ae. longissima		USA359	TAM 4	ISR	Unknown
2	TA1911	Ae. longissima		USA109	G609	ISR	HaNegev (Southern (HaDarom)); Gilat; northern Nagev	31.3263	34.6489	135
3	TA1912	Ae. longissima		USA109	G1303	ISR	Central (Hamerkaz); 3 km SE of Rehovot	31.8811	34.8445	82
4	TA1913	Ae. longissima		USA628	84TK154-026	TUR	Izmir; Agean Agricultural Research Institute gene bank; Menemen
5	TA1914	Ae. longissima		USA109	G3529	ISR	HaNegev (Southern (HaDarom)); Between Beer Sheva and Yeruham (Kjaryeruham); central Nagev	31.1106	34.8225	345
6	TA1916	Ae. longissima		RUS001	VIR 2291	JOR	Unknown
7	TA1917	Ae. longissima	var. typica	USA109	G1308	ISR	Central (Hamerkaz); 5 km N of Raanana on the Sharon Plain	32.2323	34.8812	20
8	TA1921	Ae. longissima	var. nova	USA109	G1415	JOR	Al Balqa (Balqa); Basin of the Jordan River (Amman‚ Dead Sea)	31.8717	35.5806	305
9	TA1924	Ae. longissima		USA109	G759	CAN	University of Manitoba; Winnipeg
10	TA10552	Ae. longissima		ISR005	TL01	ISR	HaNegev (Southern (HaDarom)); Revivim; central Negev	31.0506	34.8153	265
11	TA10553	Ae. longissima		ISR005	TL14	ISR	HaNegev (Southern (HaDarom)); Between (Horvot) Shivta and (Horvot) Haluza; western Nagev	31.0353	34.5911	250
12	TA11029	Ae. longissima		USA288	P282	XKX	University of Missouri; Columbia
1	TA1837	Ae. searsii		ISR005	TE05	PSE	Palestine; West Bank [Hebron]; E of Kurza on the Hebron (Al Khalil)‚ Beer Sheva road; Judea	31.4445	35.0196	675
2	TA1838	Ae. searsii		ISR005	TE08	PSE	Palestine; West Bank [Hebron]; S (~5 km) of Daharia (Az Zahiriyah) on the Hebron (Al Khalil)‚ Beer Sheva road	31.3645	34.9753	535
3	TA1839	Ae. searsii		CAN015	RL 5703	CAN	University of Manitoba; Winnipeg
4	TA1840	Ae. searsii		ISR005	TE09	PSE	Palestine; West Bank [Ramallah]; 4 km E of Taiyiba; E of Ramala; Samaria	31.9584	35.3386	560
5	TA1841	Ae. searsii		ISR005	TE20	PSE	Palestine; West Bank [Hebron]; Turkemiya (Tarqumiyah)‚ Az Zahiriyah Road	31.5603	35.0332	730
6	TA1842	Ae. searsii		ISR005	TE21	PSE	Palestine; West Bank [Hebron]; Between Bani Naim and Kiryat Arba (Qiryat Arba)	31.5188	35.1324	895
7	TA1925	Ae. searsii		ISR005	TE24	PSE	Palestine; West Bank [Hebron]; N Horvat (Hevel) Yattir; Judea	31.35	35.0167	600
8	TA1926	Ae. searsii		ISR005	TE27	PSE	Palestine; West Bank [Bethelem]; Netiv HaLamed Hei (31.685523, 34.984589)	31.6721	35.0711	600
9	TA2130	Ae. searsii		USA109	G3525	ISR	Palestine; West Bank [Bethelem]; Bayt Fajjar (Kufar Fajer); E of Gush Etzion; 20 km towards Hebron from Bethlehem; Judea	31.6215	35.155	945
10	TA2343-1	Ae. searsii		USA109	G1417	SYR	Daraa; Suburbs of Ghabagheb	33.1839	36.2264	90
11	TA2343-2	Ae. searsii		ISR005	TE30	SYR	Daraa; Suburbs of Ghabagheb	33.1839	36.2264	90
12	TA2343-3	Ae. searsii		USA109	G1417	SYR	Daraa; Suburbs of Ghabagheb	33.1839	36.2264	90
13	TA2344	Ae. searsii		USA109	G1419	SYR	Daraa; Suburbs of Ghabagheb	33.1839	36.2264	90
14	TA2350	Ae. searsii		USA109	G1416	JOR	Irbid; Suburbs of Ar Ramtha (Amman)	32.5681	36.0099	505
15	TA2351	Ae. searsii		ISR005	TE23	ISR	Palestine; West Bank [Hebron]; N Horvat (Hevel) Yattir; Judea	31.35	35.0167	600
16	TA2353-1	Ae. searsii		USA109	G3526	PSE	Palestine; West Bank [Hebron]; Yattir	31.3656	35.1122	700
17	TA2353-2	Ae. searsii		USA109	G3526	PSE	Palestine; West Bank [Hebron]; Yattir	31.3656	35.1122	700
18	TA2354	Ae. searsii		USA109	G3527	PSE	Palestine; West Bank [Hebron]; Yattir	31.3656	35.1122	700
19	TA2355	Ae. searsii		USA109	G3528	ISR	Palestine; West Bank [Ramallah]; 1 km E of Taiyba; 15 km E of Ramala; on an east slope in the Samaria Mts.	31.9579	35.3085	765
20	TA2668	Ae. searsii		USA628	CN 400148	JOR	Al Karak; Dana; 8 km W of the Tafila (At Tafilah)‚ Ash Shawbak junction	30.6667	35.6167	1600
21	TA2669	Ae. searsii		USA628	CN 400128	JOR	Al Karak; 18 km S of Wadi Mujib Valley	31.3667	35.7	1000
22	TA11030	Ae. searsii		USA288	P810	XKX	University of Missouri; Columbia
1	TA1995	Ae. sharonensis		USA628	84TK154-045	XKX	From the Agean Agricultural Research Institute gene bank; Menemen; Izmir
2	TA1996	Ae. sharonensis		USA109	G1321	ISR	Central (Hamerkaz); Even Yehuda	32.2766	34.8851	60
3	TA1998	Ae. sharonensis		USA109	G1323	ISR	Haifa (Hefa); 10 km N of Haifa (Hefa) to Acre (Akko)	32.8513	35.0917	15
4	TA1999-1	Ae. sharonensis		USA109	G946	JPN	Laboratory of Genetics; Kyoto University
5	TA1999-2	Ae. sharonensis		USA288	W4065	USA	University of Missouri; Columbia
6	TA2064	Ae. sharonensis		USA109	G760	CAN	University of Manitoba; Winnipeg
7	TA2174	Ae. sharonensis		USA628	M89-452	ISR	Central (Hamerkaz); Rehovot; coastal plain	31.8927	34.8136	50
8	TA10414	Ae. sharonensis		ISR005	TH02	ISR	Northern (HaZafon); Na'aman salt marsh near Acre (Akko)	32.9128	35.0878	2
9	TA10434	Ae. sharonensis		GBR247	2170001	XKX	Unknown
1	TA1770	Ae. speltoides	var. ligustica	USA109	G2815	IRQ	As Sulaymaniyah	35.5898	45.1984	780
2	TA1771	Ae. speltoides	var. ligustica	USA109	G1066	TUR	Urfa; 69 km NE of Urfa	37.6599	39.2184	620
3	TA1772	Ae. speltoides	var. ligustica	USA109	G1039	TUR	Konya; 84 km E of Eregli	37.4574	34.8809	850
4	TA1773	Ae. speltoides	var. speltoides	USA109	G1089	TUR	Bitlis; 155 km NE of Diyarbakir	38.2252	41.8799	700
5	TA1774	Ae. speltoides	var. ligustica	USA109	G1161	TUR	Elazig; 303 km SW of Erzurum near Elazig	38.6169	39.3036	1000
6	TA1775	Ae. speltoides	var. speltoides	USA109	G1167	TUR	Malatya; 29 km S of Malatya	38.1667	38.3167	1030
7	TA1776	Ae. speltoides	var. speltoides	USA109	G1171	TUR	Malatya; 29 km S of Malatya	38.1667	38.3167	1030
8	TA1777	Ae. speltoides	var. ligustica	USA109	G1180	TUR	Malatya; 36 km N of Malatya	38.6142	38.2848	820
9	TA1778	Ae. speltoides	var. ligustica	USA109	G1408	TUR	Kirakkale; 6 km SE of Cerikli	39.8752	34.0638	655
10	TA1779	Ae. speltoides	var. speltoides	USA109	G1819	TUR	Urfa; 41.1 km W of Kiziltepe	37.2167	40.15	600
11	TA1780	Ae. speltoides	var. ligustica	USA109	G1864	TUR	Sanliurfa; 80.5 km W of Kiziltepe	37.2238	39.9291	670
12	TA1781	Ae. speltoides	var. speltoides	USA109	G1896	TUR	Urfa; 78.9 km W of Kiziltepe	37.2374	39.7128	720
13	TA1783	Ae. speltoides	var. speltoides	USA109	G617	ISR	Haifa (Hefa); Technion (Israel Institute of Technology) campus; Haifa	32.7775	35.0217	200
14	TA1784	Ae. speltoides	var. speltoides	USA109	G619	ISR	Southern (HaDarom); 4 km E of Ashkelon (Ashqelon)	31.6675	34.6174	58
15	TA1785	Ae. speltoides	var. ligustica	USA109	G1909	TUR	Mardin; 45.4 km E of Nusaybin after turn to Idil	37.1538	41.6986	585
16	TA1786	Ae. speltoides	var. speltoides	USA109	G1936	TUR	Urfa; 2.9 km S of Viransehir	37.2065	39.7832	545
17	TA1787	Ae. speltoides	var. speltoides	USA109	G1971	TUR	Urfa; 5.9 km E of Urfa	37.1494	38.8497	660
18	TA1788	Ae. speltoides	var. speltoides/ligustica mix	USA109	G724	IRQ	Arbil (Irbil); Rawanduz	36.6125	44.5244	580
19	TA1789	Ae. speltoides	var. ligustica	USA109	G2294	IRQ	Arbil (Irbil); 4 km NE of Shaqlawah	36.4167	44.3667	1000
20	TA1790	Ae. speltoides	var. ligustica	USA109	G2296	IRQ	Arbil (Irbil); 4 km NE of Shaqlawah	36.4167	44.3667	1000
21	TA1791	Ae. speltoides	var. speltoides	USA109	G1972	TUR	Urfa; 22.1 km E of Urfa	37.1609	39.0296	760
22	TA1792	Ae. speltoides	var. ligustica	USA109	G2020	TUR	Urfa; Roadside next to fallow fields	37.6115	39.0138	650
23	TA1793	Ae. speltoides	var. speltoides	USA109	G2148	SYR	Al Hasakah (Haseke); S of Al Qamishli	37.0196	41.2015	375
24	TA1795	Ae. speltoides	var. speltoides	USA109	G2502	IRQ	As Sulaymaniyah; 10 km S of As-Sulaymaniyah to Qara Dagh	35.4937	45.458	720
25	TA1796	Ae. speltoides	var. speltoides	USA109	G3210	IRQ	Arbil (Irbil); 24 km NE of Dahuk to Al Amadiyah	36.9667	43.1833	950
26	TA1836	Ae. speltoides	var. speltoides	CAN015	RL 5196	CAN	Unknown
27	TA1845	Ae. speltoides	var. ligustica	USA109	G413	TUR	Diyarbakir; Along Tigris River opposite city of Diyarbakir	37.915	40.251	580
28	TA1905	Ae. speltoides	var. speltoides	USA109	G857	ITA	Instituto Orto Botanico; Rome
29	TA1922	Ae. speltoides	var. speltoides	USA628	84TK053-133.04	TUR	Hatay (Antakya); 1 km N of Iskenderum (Alexandretta)	36.6001	36.1969	50
30	TA1923	Ae. speltoides	var. speltoides	USA628	84TK066-015	TUR	Gaziantep; 1 km W of village of Kocabeyli (Kocabey); 27 km NW of Kilis	36.8124	36.911	510
31	TA1928	Ae. speltoides	var. speltoides/ligustica mix	USA628	84TK118-111.03	TUR	Urfa; 7 km NE of Harrun ruins at junction to Urfa	36.85	38.9259	350
32	TA1929	Ae. speltoides	var. speltoides	USA628	84TK123-015.04	TUR	Urfa; 42 km E of Urfa	37.2106	39.2212	600
33	TA1930	Ae. speltoides	var. ligustica	USA109	G412	TUR	Diyarbakir; Diyarbakir	37.9148	40.2306	670
34	TA1931	Ae. speltoides	var. speltoides	USA628	84TK125-019	TUR	Sanliurfa; 20 km W of Viransehir	37.2167	39.55	550
35	TA1932	Ae. speltoides	var. speltoides	USA628	84TK097-018	TUR	Diyarbakir; 4 km NW of Bismil	37.8765	40.6158	750
36	TA1933	Ae. speltoides	var. speltoides	USA628	84TK109-078	TUR	Diyarbakir; 25 km SW of Diyarbakir	37.9063	39.9573	1000
37	TA1934	Ae. speltoides	var. speltoides	USA628	84TK117-108	TUR	Urfa; 8 km N of Urfa	37.2281	38.7955	600
38	TA1935	Ae. speltoides	var. speltoides	USA628	84TK118-110	TUR	Urfa; 7 km NE of Harrun ruins at junction to Urfa	36.85	38.9259	350
39	TA1936	Ae. speltoides	var. speltoides	USA628	84TK138-023.01	TUR	Adiyamin; 9 km N of junction of Nimrud (Mount Nemrut)	37.8814	38.7419	500
40	TA1937	Ae. speltoides	var. speltoides	USA628	84TK124-016	TUR	Urfa; 48 km E of Urfa	37.2281	39.2953	600
41	TA1938	Ae. speltoides	var. speltoides	USA628	84TK126-039	TUR	Urfa; 36 km N of Ceylanpinar	37.1187	39.8474	425
42	TA1939	Ae. speltoides	var. speltoides	USA628	84TK127-027	TUR	Urfa; On state farm at Ceylanpinar	36.8549	40.0507	350
43	TA1940	Ae. speltoides	var. speltoides	USA628	84TK438-001	TUR	Malatya; 27 km N of Malatya	38.5576	38.2441	675
44	TA1941	Ae. speltoides	var. ligustica	USA109	G859	ITA	Instituto Orto Botanico, Rome
45	TA1946	Ae. speltoides	var. speltoides	USA628	84TK566-001	TUR	Hakkari; 21 km SW of Semdinli	37.2101	44.4411	1125
46	TA1948	Ae. speltoides	var. speltoides	USA628	84TK582-002	TUR	Bitlis; 18 km S of Bitlis	38.3193	42.1916	1225
47	TA1955	Ae. speltoides	var. speltoides	USA628	84TK586-001	TUR	Siirt; 22 km NW of Siirt	38.0064	41.8304	630
48	TA1969	Ae. speltoides	var. speltoides	USA628	84TK062-004.0	TUR	Hatay (Antakya); 4 km N of Kirikhan in route to Hassa	36.5345	36.3792	120
49	TA1970	Ae. speltoides	var. speltoides	USA628	84TK063-005.0	TUR	Hatay (Antakya); 19 km N of Kirikhan in route to Hassa	36.6538	36.4544	225
50	TA1971	Ae. speltoides	var. speltoides	USA628	84TK064-010.0	TUR	Hatay (Antakya); 1 km S of village of Saparozu; 3.5 km E of Hassa	36.853	36.5955	400
51	TA2065	Ae. speltoides	var. speltoides	USA109	G615	TUR	Elazig; 16 km NW of Elazig	38.7364	39.044	980
52	TA2076	Ae. speltoides	var. ligustica	USA288	79TS01-b	ISR	Southern (HaDarom); Ashkelon (Ashqelon)	31.6662	34.563	50
53	TA2092	Ae. speltoides	var. speltoides	USA628	84TK566-007	TUR	Hakkari; 21 km SW of Semdinli	37.2101	44.4411	1125
54	TA2097	Ae. speltoides	var. ligustica	USA628	84TK098-021.02	TUR	Diyarbakir; 4 km N of the Diyarbakir	38.0524	40.4479	875
55	TA2098-1	Ae. speltoides	var. ligustica	USA628	84TK115-118	TUR	Urfa; 3 km SW of Hilvan	37.5631	38.9318	600
56	TA2098-2	Ae. speltoides	var. ligustica	USA628	84TK115-118	TUR	Urfa; 3 km SW of Hilvan	37.5631	38.9318	600
57	TA2099-1	Ae. speltoides	var. ligustica	USA628	84TK119-113	TUR	Urfa; 29 km S of Urfa	36.9181	38.9108	325
58	TA2099-2	Ae. speltoides	var. ligustica	USA628	84TK119-113	TUR	Urfa; 29 km S of Urfa	36.9181	38.9108	325
59	TA2100	Ae. speltoides	var. speltoides	USA628	84TK073-025	TUR	Gaziantep; 4 km N of Yavuzeli	37.3369	37.566	450
60	TA2101	Ae. speltoides	var. ligustica	USA628	84TK120-002	TUR	Urfa; 3 km NW of junction to Bozova; N of Urfa then NW toward Bozova	37.2678	38.7646	700
61	TA2103	Ae. speltoides	var. ligustica	USA628	84TK129-034	TUR	Urfa; On state farm at Ceylanpinar	36.8549	40.0507	380
62	TA2107	Ae. speltoides	var. ligustica	USA628	84TK114-101.05	TUR	Urfa; 3 km N of Hilvan	37.6175	38.9579	600
63	TA2110	Ae. speltoides	var. ligustica	USA628	84TK118-111.01	TUR	Urfa; 7 km NE of Harrun ruins at junction to Urfa	36.85	38.9259	350
64	TA2114	Ae. speltoides	var. ligustica	USA628	84TK130-035	TUR	Diyarbakir; 7 km S of Cinar (S of Diyarbakir; at a water source/spring)	37.6784	40.4407	625
65	TA2120	Ae. speltoides	var. ligustica	USA628	84TK125-020	TUR	Sanliurfa; 20 km W of Viransehir	37.2167	39.55	550
66	TA2121	Ae. speltoides	var. ligustica	USA628	84TK129-033	TUR	Urfa; On state farm at Ceylanpinar	36.8549	40.0507	380
67	TA2122	Ae. speltoides	var. ligustica	USA628	84TK329-007	TUR	Ankara; 12 km NE of the Ankara city limits sign	40.0333	32.9167	900
68	TA2124	Ae. speltoides	var. ligustica	USA628	84TK330-001	TUR	Ankara; 5 km E of the Ankara city limits sign	39.9333	32.9333	575
69	TA2129	Ae. speltoides	var. ligustica	USA628	84TK457-001	TUR	Tunceli; 27 km S of Tunceli	38.8611	39.7897	850
70	TA2148	Ae. speltoides	var. ligustica	USA628	84TK439-001	TUR	Malatya; 28 km N of Malatya	38.5641	38.2372	650
71	TA2149	Ae. speltoides	var. speltoides	USA628	84TK583-001	TUR	Bitlis; 7 km N of Baykan	38.1993	41.8287	850
72	TA2150	Ae. speltoides	var. speltoides	USA628	84TK584-001	TUR	Siirt; 11 km S of Baykan	38.1124	41.7563	1235
73	TA2342	Ae. speltoides	var. speltoides	USA109	G1271	ISR	Southern (HaDarom); Ashkelon (Ashqelon)	31.6662	34.563	50
74	TA2348	Ae. speltoides	var. speltoides	USA109	G1272	ISR	Haifa (Hefa); Technion (Israel Institute of Technology) campus; Haifa	32.7775	35.0217	200
75	TA2356	Ae. speltoides	var. speltoides	USA628	79TK016-069	TUR	Elazig; 25 km SW of Elazig	38.5333	39.0333	1160
76	TA2357	Ae. speltoides	var. speltoides	USA628	79TK021-96	TUR	Diyarbakir; 10 km NE of Diyarbakir Regional Research Institute	37.9667	40.3333	650
77	TA2358	Ae. speltoides	var. speltoides	USA628	79TK021-104	TUR	Diyarbakir; 10 km NE of Diyarbakir Regional Research Institute	37.9667	40.3333	650
78	TA2359	Ae. speltoides	var. speltoides	USA628	79TK021-112	TUR	Diyarbakir; 10 km NE of Diyarbakir Regional Research Institute	37.9667	40.3333	650
79	TA2360	Ae. speltoides	var. ligustica	USA628	79TK021-125-1	TUR	Diyarbakir; 10 km NE of Diyarbakir Regional Research Institute	37.9667	40.3333	650
80	TA2361	Ae. speltoides	var. speltoides	USA628	79TK021-126-1	TUR	Diyarbakir; 10 km NE of Diyarbakir Regional Research Institute	37.9667	40.3333	650
81	TA2362	Ae. speltoides	var. speltoides	USA628	79TK021-129-1	TUR	Diyarbakir; 10 km NE of Diyarbakir Regional Research Institute	37.9667	40.3333	650
82	TA2363	Ae. speltoides	var. speltoides	USA628	79TK021-130	TUR	Diyarbakir; 10 km NE of Diyarbakir Regional Research Institute	37.9667	40.3333	650
83	TA2364	Ae. speltoides	var. speltoides	USA628	79TK021-131	TUR	Diyarbakir; 10 km NE of Diyarbakir Regional Research Institute	37.9667	40.3333	650
84	TA2365	Ae. speltoides	var. speltoides	USA628	79TK021-132-1	TUR	Diyarbakir; 10 km NE of Diyarbakir Regional Research Institute	37.9667	40.3333	650
85	TA2367	Ae. speltoides	var. speltoides	USA628	79TK021-147	TUR	Diyarbakir; 10 km NE of Diyarbakir Regional Research Institute	37.9667	40.3333	650
86	TA2368	Ae. speltoides	var. speltoides	USA628	79TK021-120E	TUR	Diyarbakir; 10 km NE of Diyarbakir Regional Research Institute	37.9667	40.3333	650
87	TA2645	Ae. speltoides	var. ligustica	USA628	84TK585-001	TUR	Siirt; 18 km S of Baykan	38.0854	41.8126	600
88	TA2646	Ae. speltoides	var. ligustica	USA628	84TK443-001	TUR	Elazig; 1 km E of the Arapkir-Elazig-Malatya junction toward Elazig	38.8473	38.6454	1000
89	TA2670	Ae. speltoides	var. speltoides	USA628	84TK450-001	TUR	Elazig; 12 km SW of Tunceli at junction in road	39.0299	39.496	850
90	TA2771	Ae. speltoides	var. speltoides	USA628	84TK119-119	TUR	Urfa; 29 km S of Urfa	36.9181	38.9108	325
91	TA2772	Ae. speltoides	var. ligustica	USA628	84TK126-025	TUR	Urfa; 36 km N of Ceylanpinar	37.1187	39.8474	425
92	TA2773	Ae. speltoides	var. speltoides / var. ligustica mix	USA628	84TK440-001	TUR	Malatya; 33 km N of Malatya	38.5911	38.2769	680
93	TA2774	Ae. speltoides	var. ligustica	USA628	84TK458-002	TUR	Elazig; 5 km E of Tunceli	38.7487	39.9284	900
94	TA2779	Ae. speltoides	var. ligustica	USA359	9211-5	ISR	Haifa (Hefa); Nir Etzion	32.6992	34.9922	210
95	TA2780-1	Ae. speltoides	var. speltoides	USA359	9212-2	ISR	Haifa (Hefa); Technion (Israel Institute of Technology) campus; Haifa	32.7781	35.0192	200
96	TA2780-2	Ae. speltoides	var. ligustica	USA359	9212-2	ISR	Haifa (Hefa); Technion (Israel Institute of Technology) campus; Haifa	32.7781	35.0192	200
97	TA2781	Ae. speltoides	var. ligustica	USA359	9213-2	ISR	Haifa (Hefa); Nir Etzion	32.6992	34.9922	210
98	TA10544	Ae. speltoides	var. speltoides	SYR002	IG 46560	SYR	Halab (Aleppo); 95 km NE of Aleppo in the valley of Euphrates; between Manbij and Jarablus	36.6397	38.0386	445
99	TA10545	Ae. speltoides	var. speltoides	SYR002	IG 46566	SYR	Idlib (Idleb); 1 km before Roman road; between Atareb and Bab El Hawa	36.1944	36.75	450
100	TA10549	Ae. speltoides	var. speltoides	ISR005	134	XKX	Unknown
101	TA11031	Ae. speltoides	var. ligustica	USA288	W33-3	XKX	University of Missouri; Columbia
102	TA11032	Ae. speltoides	var. ligustica	USA288	W31-7931	XKX	University of Missouri; Columbia
103	TA11257	Ae. speltoides	var. ligustica	ARG919	D.I.V. 11990	XKX	Unknown

## Sheet: Vertebrata_Section
E) Vertebrata_Section
Note: The Ae. tauschii accessions included here does not reflect the whole Ae. tauschii collection in the WGRC gene bank as most of them were already curated in the Singh et al. (2019), [https://pubmed.ncbi.nlm.nih.gov/30679756/]
S.N.	Accession ID	Species	Sub Taxa	Accession Name	Donor Number	Collection_Country	Collection Site	Latitude	Longitude	Elevation
1	TA1873	Ae. crassa		USA109	G397	IRN	Fars; Badgka; 12.8 km (8 miles) NE of Shiraz	29.7203	52.5867	1810
2	TA1874	Ae. crassa		USA109	G398	IRN	Fars; Takht-e Jamshid (Persepolis) historical site near Marv Dasht	29.9355	52.8916	1640
3	TA1875	Ae. crassa		USA109	G399	IRN	Chahar Mahall va Bakhtiari; Dastana (Dasht-e-Taneh); S of Shahr-e-Kord	32.0583	50.7705	2015
4	TA1876	Ae. crassa	var. typica	USA109	G604	IRN	Bakhtaran (Kermanshahan); About 0.8 km E of Bakhtaran (Kermanshah)	34.3144	47.0912	1360
5	TA1877	Ae. crassa		USA109	G394	IRQ	Arbil (Irbil); Arbil (Irbil) Forest nursery	36.2	44.0167	458
6	TA1878	Ae. crassa		USA628	84TK154-041	TUR	Izmir; Agean Agricultural Research Institute gene bank; Menemen
7	TA1880	Ae. crassa		USA109	G400	TUR	Sanliurfa; Ceylanpinar	36.8508	40.0475	367
8	TA1881	Ae. crassa		USA109	G396	AFG	Ghazni; Upper Tarnak Valley	32.7	67.7	1954
9	TA1882	Ae. crassa		USA109	G766	ROU	Gradina Botanica; Cluj
10	TA1883	Ae. crassa		USA109	G858	ITA	Lazio; Instituto Orto Botanico; Rome
11	TA1884	Ae. crassa		USA109	G745	CAN	Manitoba; University of Manitoba; Winnipeg
12	TA2128	Ae. crassa		KAZ037		KAZ	South Kazakh; Sary Agach	41.4518	69.1476	435
13	TA2212	Ae. crassa		DEU146	AE 244/80	TKM	Unknown
14	TA2213	Ae. crassa		DEU146	AE 290/77	TKM	Ahal; Kopet Dag (Koppeh Dagh) Mountains	37.8575	58.1177	1435
15	TA2214	Ae. crassa		DEU146	AE 332/92	IRQ	Unknown
16	TA2215	Ae. crassa		DEU146	AE 1/77	UZB	Tashkent Botanical Garden
17	TA2216	Ae. crassa		DEU146	AE 177/77	UZB	Tashkent Botanical Garden
18	TA2217	Ae. crassa		DEU146	AE 847/84	UZB	Tashkent Botanical Garden
19	TA2318	Ae. crassa		USA109	G1962	TUR	Sanliurfa; 14.6 km W of Ceyalpinar	36.795	39.9065	395
20	TA2319	Ae. crassa		USA109	G1963	TUR	Sanliurfa; 45.8 km W of Ceyalpinar	36.7345	39.5892	425
21	TA2320	Ae. crassa		USA109	G1964	TUR	Sanliurfa; 45.8 km W of Ceyalpinar	36.7345	39.5892	425
22	TA2337	Ae. crassa		USA109	G1570	IRQ	Ninawa; Tal Afar	36.3737	42.4518	400
23	TA2338	Ae. crassa		USA109	G1571	IRN	Hamadan; 80 km E of Bakhtaran (Kermanshah) to Hamadan	34.4477	47.8729	1560
24	TA2339	Ae. crassa		USA109	G1572	IRN	Khorasan; E of Bojnurd	37.4749	57.4091	1040
25	TA10334	Ae. crassa		TJK020	ACRA 1	TJK	Leninobad; Ghonchy (Ganchi) district; north Tajikistan	39.9667	69.1333	900
26	TA10335	Ae. crassa		TJK020	ACRA 2	TJK	Leninobad; Ghonchy (Ganchi) district; north Tajikistan	39.9667	69.1333	900
27	TA10336	Ae. crassa		TJK020	ACRA 3	TJK	Leninobad; Ghonchy (Ganchi) district; north Tajikistan	39.9667	69.1333	900
28	TA10337	Ae. crassa		TJK020	ACRA 4	TJK	Leninobad; Ghonchy (Ganchi) district; north Tajikistan	39.9667	69.1333	900
29	TA10338	Ae. crassa		TJK020	ACRA 5	TJK	Leninobad; Ghonchy (Ganchi) district; north Tajikistan	39.9667	69.1333	900
30	TA10339	Ae. crassa		TJK020	ACRA 6	TJK	Karotegin; Hisor (Hissar) district; central Tajikistan	38.5256	68.5472	450
31	TA10340	Ae. crassa		TJK020	ACRA 7	TJK	Karotegin; Hisor (Hissar) district; central Tajikistan	38.5256	68.5472	450
32	TA11089	Ae. crassa		USA029	PI 317393	AFG	Badghis; 11 mi SE of Qala Nau	34.9333	63.25	1068
33	TA11090	Ae. crassa		USA029	PI 317400	AFG	Samangan; 10 mi SW of Haibak	36.1833	67.8833	1098
34	TA11091	Ae. crassa		USA029	PI 487286	JOR	Kerak; 132 km S of junction Amman-desert road to Aqaba	30.7	35.9	850
1	TA2115	Ae. juvenalis		USA109	G740	CAN	University of Manitoba; Winnipeg
2	TA2116	Ae. juvenalis		USA109	G741	CAN	University of Manitoba; Winnipeg
3	TA2346	Ae. juvenalis		USA109	G1575	IRN	Bakhtaran (Kermanshahan); 70 km N of Ilam to Eslamabad	33.9456	46.2277	1590
4	TA2347	Ae. juvenalis		USA109	G1576	IRQ	Ninawa; Sinjar	36.3131	41.865	515
5	TA2666	Ae. juvenalis		USA628	84TK154-024	TUR	Izmir; Agean Agricultural Research Institute gene bank; Menemen
6	TA10045	Ae. juvenalis		DEU146	AE 91	GBR	Botanical Garden; University of Reading
7	TA10046	Ae. juvenalis		DEU146	AE 555	DEU	Institute of Plant Breeding; Hadmersleben
8	TA10047	Ae. juvenalis		DEU146	AE 578	DEU	Institute of Plant Breeding; Hohenthurm
9	TA10048	Ae. juvenalis		DEU146	AE 582	DNK	Botanical Garden; University of Copenhagen
1	SX13	Ae. tauschii
2	SX26	Ae. tauschii
3	T012	Ae. tauschii
4	T015	Ae. tauschii
5	T054	Ae. tauschii
6	T066	Ae. tauschii
7	T068	Ae. tauschii
8	T093	Ae. tauschii
9	T103	Ae. tauschii
10	TA11077	Ae. tauschii	subsp. tauschii	GEO028	Gt 15	GEO	Kvemo Kartli; Gardabani District; Village of Kojori	41.66	44.71
11	TA11078	Ae. tauschii	subsp. strangulata	GEO028	Gt 17	GEO	Kvemo Kartli; Gardabani District; Village of Tsavkisi	41.67	44.74
12	TA11079	Ae. tauschii	subsp. tauschii	GEO028	Gt 19	GEO	Tbilisi; Village of Okrokana; near the Kolkheti restaurant	41.69	44.79	714
13	TA11080	Ae. tauschii	subsp. tauschii	GEO028	Gt 24	GEO	Kvemo Kartli; Tetritskaro DIstrict; Village of Koda	41.58	44.78	644
14	TA11081	Ae. tauschii	subsp. strangulata	GEO028	Gt 30	GEO	Tbilisi; Saburtalo District; Ivane Javakhishvili Tbilisi State University	41.72	44.72
15	TA11082	Ae. tauschii	subsp. strangulata	GEO028	Gt 34	GEO	Tbilisi; Didi Dighomi District; Petre Iberi Avenue	41.79	44.76	865
16	TA11083	Ae. tauschii	subsp. tauschii	GEO028	Gt 40	GEO	Kvemo Kartli; Tetritskaro [Tetri Tskaro] District	41.54	44.47	1122
17	TA11108	Ae. tauschii	subsp. tauschii	DEU146	AE 1517	XKX	Unknown
18	TA11128	Ae. tauschii
19	TA11129	Ae. tauschii
20	TA11130	Ae. tauschii
21	TA11131	Ae. tauschii
22	TA11132	Ae. tauschii
23	TA11133	Ae. tauschii
24	TA11134	Ae. tauschii
25	TA11135	Ae. tauschii
26	TA1595_L2	Ae. tauschii
27	TA1604_L2	Ae. tauschii
28	TA1604_L3	Ae. tauschii
29	TA1629_L2	Ae. tauschii
30	TA1631_L2	Ae. tauschii
31	TA1652_L2	Ae. tauschii
32	TA1653_L2	Ae. tauschii
33	TA1655_L2	Ae. tauschii
34	TA1655_L2.1	Ae. tauschii
35	TA1657_L2	Ae. tauschii
36	TA1675_L2	Ae. tauschii
37	TA1692_L2	Ae. tauschii
38	TA1692_L3	Ae. tauschii
39	TA1693_L2	Ae. tauschii
40	TA1694_L2	Ae. tauschii
41	TA1704_L2	Ae. tauschii
42	TA2370_L2	Ae. tauschii
43	TA2377_L2	Ae. tauschii
44	TA2378_L2	Ae. tauschii
45	TA2436_L2	Ae. tauschii
46	TA2451_L2	Ae. tauschii
47	TA2452_L2	Ae. tauschii
48	TA2455_L2	Ae. tauschii
49	TA2468_L2	Ae. tauschii
50	TA2528_L2	Ae. tauschii
1	TA2340	Ae. vavilovii		USA109	G1574	ISR	Mishos Chdva; Nachal Abde
2	TA2655	Ae. vavilovii		USA628	CN 400143	JOR	At Tafilah; 132 km S of Amman‚Äìdesert road at junction to Aqaba	30.7	35.9	850
3	TA2690	Ae. vavilovii		RUS001	VIR 2334	IRQ	Unknown
4	TA2691	Ae. vavilovii		RUS001	VIR 2333	JOR	Unknown
5	TA10146	Ae. vavilovii		SYR002	IG 117904	SYR	Aleppo; After 2 km from site #5; S on the way to Ain Al Arab	36.8908	38.2386	470
1	TA1989-1	Ae. ventricosa		USA109	G667	GBR	Department of Agricultural Botany; University of Reading
2	TA1989-2	Ae. ventricosa		USA029	PI 330493	GBR	Department of Agricultural Botany; University of Reading
3	TA1990	Ae. ventricosa		USA109	G709	CHE	Botanischer Garten der University; Zurich
4	TA1992	Ae. ventricosa		USA109	G744	CAN	University of Manitoba; Winnipeg
5	TA1993	Ae. ventricosa		USA109	G780	ROU	Gradina Botanica; Cluj
6	TA1994	Ae. ventricosa		USA109	G862	ITA	Instituto Orto Botanico; Rome
7	TA2053	Ae. ventricosa		MAR071	OB 69	MAR	Khenifra; Aguelmouss	33.1587	-5.84558	1175
8	TA2067	Ae. ventricosa		MAR071	OB 86	MAR	Ait Oufela	32.9292	-5.05206	1745
9	TA2181	Ae. ventricosa		USA628	M89-47	FRA	Unknown
10	TA2209	Ae. ventricosa	var. ventricosa	DEU146	AE 645/94	DZA	Unknown
11	TA2210	Ae. ventricosa	var. truncata	DEU146	AE 842/91	LBY	Gharyan; N of Gharyan; in Jabal Nafusah; Tripolitania	32.261	12.9302	550
12	TA2211	Ae. ventricosa		DEU146	AE 1054/93	ESP	Mallorca; Baleares; Palma de Mallorca; Bellver	39.5625	2.62
13	TA2228	Ae. ventricosa		MAR071	OB 12	MAR	Meknes; 25 km S of El-Hajeb to Azrou	33.503	-5.29129	1430
14	TA2230	Ae. ventricosa		MAR071	OB 15	MAR	Fes; 11 km from Azrou between Azrou	33.483	-5.1519	1645
15	TA2234	Ae. ventricosa		MAR071	OB 20	MAR	Fes; Station Annasseur; Sefrou	33.8292	-4.84051	840
16	TA10010	Ae. ventricosa		MAR071	OB 112	MAR	Azilal; Ait Hhamed	31.8781	-6.47033	1665
17	TA10033	Ae. ventricosa		MAR071	OB 137	MAR	Agouim; center of town	31.1572	-7.46315	1720
18	TA11037	Ae. ventricosa		USA288	P316	XKX	University of Missouri; Columbia
19	TA11236	Ae. ventricosa		USA1004		XKX	Unknown
20	TA11258	Ae. ventricosa		USA029	PI 277000	XKX	Unknown
21	TA11259	Ae. ventricosa		USA029	PI 367258	XKX	Unknown
22	TA11260	Ae. ventricosa		USA029	PI 542385	TUR	Izmir; Agean Agricultural Research Institute gene bank; Menemen

## Sheet: Ae. mutica
Ae. mutica
S.N.	Accession ID	Species	Sub Taxa	Accession Name	Donor Number	Collection_Country	Collection Site	Latitude	Longitude	Elevation
	TA2111	Ae. mutica	var. muticum	USA109	G985	TUR	Ankara; 120 km NW of Kirsehir			1200
	TA2113	Ae. mutica	var. muticum	USA109	G1182	TUR	Malatya; 39 km N of Malatya	38.6378	38.2922	800
	TA2193	Ae. mutica	var. muticum	GBR247	TQ04	GBR	England; Plant Breeding Institute; Cambridge
	TA2741	Ae. mutica	var. loliaceae	JPN001	KU-5501	TUR	Yozgat
	TA2742	Ae. mutica	var. muticum	JPN001	KU-5521	TUR	Yozgat
	TA2743	Ae. mutica	var. loliaceae	JPN001	KU-5571	TUR	Nigde; 55 km E of Eregli; along roadside past Ulukisla			1500
	TA2744	Ae. mutica	var. muticum	JPN001	KU-5598	TUR	Malatya; 38.3 km SW from Malatya to Maras			890
	TA2745	Ae. mutica	var. muticum	JPN001	KU-5613	TUR	Malatya; 40.1 km SW from Malatya to Maras			910
	TA2746	Ae. mutica	var. loliaceae	JPN001	KU-5620	TUR	Malatya; 46.2 km SW from Malatya to Maras			960
	TA2747	Ae. mutica	var. loliaceae	JPN001	KU-5631	IRN	Azarbayjan-e Bakhtari (West Azerbaijan); 71.2 km SW from Maku to Khvoy (Khoy)			1440
	TA2748	Ae. mutica	var. muticum	JPN001	KU-5641	TUR	Ankara; Near bus terminal in Ankara
	TA2749	Ae. mutica	var. loliaceae	JPN001	KU-5646	TUR	Ankara; W side of Lake Mugan
	TA2750	Ae. mutica	var. muticum	JPN001	KU-5647	TUR	Konya; Suburbs of Konya
	TA2751	Ae. mutica	var. loliaceae	JPN001	KU-5652	TUR	Sivas; 89 km NE of Kayseri
	TA2752	Ae. mutica	var. loliaceae	JPN001	KU-5653	TUR	Konya; N of Konya (Konya-Ankara)
	TA2753	Ae. mutica	var. muticum	DEU146	AE 126/31	RUS	St. Petersburg
	TA2754	Ae. mutica	var. muticum	DEU146	AE 367/89	ARM	Unknown
	TA2755	Ae. mutica	var. loliaceae	DEU146	AE 464/86	ARM	Unknown
	TA2776	Ae. mutica	var. muticum	JPN001	KU-12008	TUR	Ankara; 27.6 km E of Kirikkale to Yozgat			900

## Sheet: Ae.tauschii.collection
These are the Ae. tauschii accessions previously curated and analyzed in https://pubmed.ncbi.nlm.nih.gov/30740115/; these lines GBS data were provided with the link https://github.com/cropgen/Code_Ae_tauschiiDiversity/blob/master/required_files/lininfo.txt
In this study, we used these accessions and the GBS data to understand the genomic relations of diploid Aegilops and wheat Subgenomes B and D.
Ae. tauschii
TA2505
TA2508
TA2509
TA2510
TA2514
TA2512
TA2517
TA2518
TA2516
TA2519
TA2520
TA2400
TA2521
TA2524
TA2525
TA2522
TA2523
TA2528
TA2529
TA2526
TA2410
TA2531
TA2532
TA2530
TA2535
TA2536
TA2533
TA2534
TA2539
TA2537
TA2538
TA2542
TA2422
TA2546
TA2547
TA2545
TA2548
TA2549
TA2399
TA2553
TA2430
TA2558
TA2555
TA2559
TA2561
TA2564
TA2565
TA2568
TA2569
TA2566
TA2567
TA2571
TA2575
TA2576
TA2573
TA2574
TA2579
TA2456
TA2577
TA3429
TA2583
TA2587
TA2584
TA2585
TA2473
TA2474
TA2485
TA2498
TA2389
TA2502
TA2503
TA2500
TA2501
TA2506
TA2507
TA2504
TA2513
TA2511
TA2515
TA2403
TA2404
TA2401
TA2402
TA2407
TA2408
TA2405
TA2406
TA2527
TA2409
TA2411
TA2414
TA2415
TA2412
TA2413
TA2419
TA2416
TA2417
TA2421
TA2543
TA2540
TA2420
TA2541
TA2425
TA2426
TA2423
TA2544
TA2424
TA2429
TA2427
TA2428
TA2391
TA2392
TA2390
TA2395
TA2396
TA2393
TA2394
TA2397
TA2398
TA2550
TA2432
TA2433
TA2554
TA2551
TA2431
TA2552
TA2436
TA2557
TA2437
TA2434
TA2435
TA2556
TA2438
TA2439
TA2560
TA2440
TA2443
TA2444
TA2441
TA2562
TA2442
TA2563
TA2447
TA2448
TA2445
TA2446
TA2449
TA2450
TA2451
TA2572
TA2570
TA2454
TA2455
TA2452
TA2453
TA2458
TA2459
TA2457
TA2578
TA2461
TA2582
TA2462
TA2580
TA2460
TA2581
TA2465
TA2586
TA2466
TA2463
TA2464
TA2469
TA2467
TA2468
TA2472
TA2470
TA2471
TA2476
TA2477
TA2475
TA2478
TA2479
TA2480
TA2483
TA2484
TA2481
TA2482
TA2487
TA2488
TA2486
TA2489
TA2490
TA2491
TA2494
TA2495
TA2492
TA2493
TA2377
TA2499
TA2378
TA2496
TA2497
TA2379
TA2380
TA2381
TA2384
TA2385
TA2382
TA2383
TA2388
TA2386
TA2387

## Sheet: CIMMYT-wheat-lines
CIMMYT wheat lines tested for the genetic relationships between wheat and diploid Aegilops
Detail information of these lines can be obtained in Gao et al. (2020), The Aegilops ventricosa 2NvS segment in bread wheat: cytology, genomics and breeding: Theor Appl Genet 134, 529–542 (2021). https://doi.org/10.1007/s00122-020-03712-y
Lines
GID88442
GID88448
GID88568
GID88208
GID268825
GID170062
GID88682
GID88560
GID88579
GID345692
GID222606
GID218678
GID170077
GID770319
GID324966
GID88425
GID88666
GID86005
GID41372
GID297260
GID88674
GID515272
GID88552
GID88436
GID222508
GID170091
GID268836
GID510934
GID126306
GID128843
GID451760
GID88498
GID82710
GID471368
GID4554587
GID498834
GID268922
GID88584
GID88598
GID346200
GID80512
GID42274
GID88470
GID740977
GID13396
GID66369
GID42174
GID66363
GID447647
GID14103
GID168979
GID575356
GID80559
GID130092
GID270393
GID471402
GID80496
GID68460
GID678105
GID109278
GID324715
GID143017
GID4970584
GID271590
GID897050
GID143009
GID222397
GID85852
GID144568
GID85861
GID271579
GID270484
GID96501
GID170752
GID270453
GID144554
GID270463
GID41948
GID626650
GID144543
GID72533
GID41830
GID222353
GID144656
GID85897
GID222478
GID270559
GID222360
GID640876
GID222371
GID222492
GID82480
GID222375
GID35056
GID222379
GID144638
GID144862
GID62427
GID270428
GID222391
GID222552
GID144612
GID88606
GID346247
GID677968
GID270518
GID270639
GID222567
GID85587
GID270402
GID324452
GID222445
GID66925
GID270406
GID88701
GID2457
GID741293
GID222344
GID222586
GID2465
GID144826
GID631700
GID88710
GID270624
GID169387
GID88715
GID88719
GID449286
GID453894
GID741166
GID88522
GID88404
GID85138
GID346047
GID324377
GID170023
GID88412
GID88658
GID777391
GID222403
GID222521
GID304660
GID88418
GID222409
GID97474
GID88650
GID88623
GID222415
GID16170
GID88509
GID170040
GID170046
GID88753
GID88631
GID88639
GID88517
GID77500
GID532190
GID455995
GID431445
GID346403
GID324847
GID346413
GID486816
GID851963
GID268832
GID1169832
GID1493157
GID346459
GID346212
GID566912
GID1995922
GID1995921
GID346421
GID346303
GID909857
GID851806
GID1370653
GID390895
GID902339
GID740897
GID1987914
GID915212
GID1706327
GID346095
GID325179
GID325168
GID325190
GID35054
GID346370
GID346493
GID346260
GID346227
GID358209
GID346479
GID346294
GID128567
GID346168
GID389183
GID346189
GID2163880
GID346153
GID346394
GID346148
