# Supplementary material for: Genomic characterization and gene bank curation of Aegilops: the wild relatives of wheat
Source: Frontiers journal article supplement (doi:10.3389/fpls.2023.1268370), 2023-10-17
Supplement: Table_2.xlsx [file Table_2.xlsx]

## Sheet: Misclassified_accessions
Supplementary Table S2: Missclassified and genetically identical Aegilops accessions preserved in the Wheat Genetics Resource Center (WGRC), Kansas State University
Misclassified accessions
S.N.	Accession ID	Earlier Taxa	Updated Taxa
1	TA10059	Ae. biuncialis	Ae. geniculata
2	TA2784	Ae. biuncialis	Ae. neglecta
3	TA2789	Ae. biuncialis	Ae. neglecta
4	TA10052	Ae. columnaris	Ae. umbellulata
5	TA11091	Ae. crassa	Ae. vavilovii
6	TA1711	Ae. geniculata	Ae. triuncialis
7	TA2043	Ae. geniculata	Ae. triuncialis
8	TA2047	Ae. geniculata	Ae. triuncialis
9	TA2236	Ae. geniculata	Ae. triuncialis
10	TA1985	Ae. kotschyi	Ae. peregrina
11	TA1986	Ae. kotschyi	Ae. peregrina
12	TA1909	Ae. markgraffii	Ae. sharonensis
13	TA2086	Ae. markgraffii	Ae. cylindrica
14	TA10062	Ae. neglecta	Ae. triuncialis
15	TA10065	Ae. neglecta	Ae. biuncialis
16	TA11000	Ae. neglecta	Ae. triuncialis
17	TA11001	Ae. neglecta	Ae. triuncialis
18	TA11002	Ae. neglecta	Ae. biuncialis
19	TA1864	Ae. neglecta	Ae. columnaris
20	TA1871	Ae. neglecta	Ae. uniaristata
21	TA2151	Ae. neglecta	Ae. uniaristata
22	TA2157	Ae. neglecta	Ae. biuncialis
23	TA2671	Ae. neglecta	Ae. triuncialis
24	TA2674	Ae. neglecta	Ae. peregrina
25	TA11085	Ae. peregrina	Ae. geniculata
26	TA2274	Ae. peregrina	Ae. kotschyi
27	TA2618	Ae. peregrina	Ae. triuncialis
28	TA2350	Ae. searsii	Ae. longissima
29	TA2174	Ae. sharonensis	Ae. longissima
30	TA2065	Ae. speltoides	Ae. sharonensis
31	TA2354	Ae. tauschii	Ae. searsii
32	TA10207	Ae. triuncialis	Ae. biuncialis
33	TA1733	Ae. triuncialis	Ae. umbellulata
34	TA1739	Ae. triuncialis	Ae. umbellulata
35	TA1750	Ae. triuncialis	Ae. kotschyi
36	TA2042	Ae. triuncialis	Ae. umbellulata
37	TA2231	Ae. triuncialis	Ae. geniculata
38	TA2296	Ae. triuncialis	Ae. geniculata
39	TA2308	Ae. triuncialis	Ae. columnaris
40	TA2588	Ae. triuncialis	Ae. biuncialis
41	TA2678	Ae. triuncialis	Ae. neglecta
42	TA2680	Ae. triuncialis	Ae. kotschyi
43	TA2683	Ae. triuncialis	Ae. kotschyi
44	TA11104	Ae. umbellulata	Ae. neglecta
45	TA2145	Ae. umbellulata	Ae. geniculata
46	TA1878	Ae. vavilovii	Ae. crassa
47	TA1882	Ae. vavilovii	Ae. crassa
48	TA1883	Ae. vavilovii	Ae. crassa
49	TA1884	Ae. vavilovii	Ae. crassa

## Sheet: Genetically_Identicals
Genetically identical Aegilop accessions. These identical accessions were identified based on allele matching above 99%
Note: the allele matching analysis was done only among those accesions whose genotype was called on the respective species reference assembly
S.N.	Species	Accession ID	Genetically Identical Accessions
1	Ae. searsii	TA11030	TA2355
2	Ae. searsii	TA2355	TA11030
3	Ae. searsii	TA1839	TA2130
4	Ae. searsii	TA2130	TA1839
5	Ae. bicornis	TA1952	TA11023, TA1956
6	Ae. bicornis	TA11023	TA1956, TA1952
7	Ae. bicornis	TA1956	TA1952, TA11023
8	Ae. longissima	TA1916	TA1921
9	Ae. longissima	TA1921	TA1916
10	Ae. sharonensis	TA2064	TA1999_L2
11	Ae. sharonensis	TA1999_L2	TA2064
12	Ae. tauschii	SX13	SX26-1, SX26-2, T103, T012, T015, T054, T068, T066, T093
13	Ae. tauschii	SX26-1	SX26-2, T103, T012, T015, T054, T068, T066, T093, SX13
14	Ae. tauschii	SX26-2	SX26-1, T103, T012, T015, T054, T068, T066, T093, SX13
15	Ae. tauschii	T012	SX26-1, SX26-2, T103, T015, T054, T068, T066, T093, SX13
16	Ae. tauschii	T015	SX26-1, SX26-2, T103, T012, T054, T068, T066, T093, SX13
17	Ae. tauschii	T054	SX26-1, SX26-2, T103, T012, T015, T068, T066, T093, SX13
18	Ae. tauschii	T066	SX26-1, SX26-2, T103, T012, T015, T054, T068, T093, SX13
19	Ae. tauschii	T068	SX26-1, SX26-2, T103, T012, T015, T054, T066, T093, SX13
20	Ae. tauschii	T093	SX26-1, SX26-2, T103, T012, T015, T054, T068, T066, SX13
21	Ae. tauschii	T103	SX26-1, SX26-2, T012, T015, T054, T068, T066, T093, SX13
22	Ae. tauschii	TA1604_L2	TA1604_L3
23	Ae. tauschii	TA1604_L3	TA1604_L2
24	Ae. tauschii	TA1675_L2	TA1692_L2, TA1693_L2
25	Ae. tauschii	TA1692_L2	TA1693_L2, TA1675_L2
26	Ae. tauschii	TA1693_L2	TA1692_L2, TA1675_L2
27	Ae. tauschii	TA2452_L2	TA2455_L2
28	Ae. tauschii	TA2455_L2	TA2452_L2
